# Supplementary material
Source: publisher figshare collection journal article supplement (https://acs.figshare.com/ndownloader/files/17513588)
Supplement: Supplementary file 1 [file 17513588]

# Supporting Information

## Oxidation of Tetrahydro- $\beta$ -carbolines by Persulfate

Haijun Chen,\* Fu Ye, Jing Luo, Yu Gao

Key Laboratory of Molecule Synthesis and Function Discovery (Fujian Province University),  
College of Chemistry, Fuzhou University, Fuzhou, Fujian 350116, China

## Table of Contents

|                                                                      |           |
|----------------------------------------------------------------------|-----------|
| <b>1. General Information.....</b>                                   | <b>4</b>  |
| <b>2. Optimization Studies.....</b>                                  | <b>5</b>  |
| Table S1: Investigation of Additives .....                           | 5         |
| Table S2: Investigation of oxidants .....                            | 6         |
| Table S3: Investigation of solvents.....                             | 7         |
| Table S4: Investigation of H <sub>2</sub> O .....                    | 8         |
| <b>3. Graphical Procedure for Gram-scale Preparation of 25 .....</b> | <b>9</b>  |
| <b>4. Graphical Procedure for Gram-scale Preparation of 2.....</b>   | <b>10</b> |
| <b>5. Mechanism Studies .....</b>                                    | <b>11</b> |
| Table S5: Investigation of the free radical inhibitor .....          | 11        |
| <b>6. General Procedures.....</b>                                    | <b>13</b> |
| Compound 2.....                                                      | 13        |
| Compound 3.....                                                      | 14        |
| Compound 4.....                                                      | 15        |
| Compound 5.....                                                      | 16        |
| Compound 6.....                                                      | 17        |
| Compound 7.....                                                      | 18        |
| Compound 8.....                                                      | 19        |
| Compound 9.....                                                      | 20        |
| Compound 10.....                                                     | 21        |
| Compound 11.....                                                     | 22        |
| Compound 12.....                                                     | 23        |
| Compound 13.....                                                     | 24        |
| Compound 14.....                                                     | 25        |
| Compound 15.....                                                     | 26        |
| Compound 16.....                                                     | 27        |
| Compound 17.....                                                     | 28        |
| Compound 18.....                                                     | 29        |
| Compound 19.....                                                     | 30        |
| Compound 20.....                                                     | 31        |
| Compound 21.....                                                     | 32        |
| Compound 22.....                                                     | 33        |
| Compound 23.....                                                     | 34        |
| Compound 24.....                                                     | 35        |
| Compound 25.....                                                     | 36        |
| Compound 26.....                                                     | 37        |
| <b>7. Preparation of Substrates.....</b>                             | <b>38</b> |
| <b>8. NMR Spectrum.....</b>                                          | <b>39</b> |
| <sup>1</sup> H NMR Spectrum of 2 .....                               | 39        |
| <sup>13</sup> C NMR Spectrum of 2 .....                              | 39        |
| <sup>1</sup> H NMR Spectrum of 3 .....                               | 40        |
| <sup>13</sup> C NMR Spectrum of 3 .....                              | 40        |
| <sup>1</sup> H NMR Spectrum of 4 .....                               | 41        |
| <sup>13</sup> C NMR Spectrum of 4 .....                              | 41        |
| <sup>1</sup> H NMR Spectrum of 5 .....                               | 42        |
| <sup>13</sup> C NMR Spectrum of 5 .....                              | 42        |

|                                          |           |
|------------------------------------------|-----------|
| $^1\text{H}$ NMR Spectrum of 6 .....     | 43        |
| $^{13}\text{C}$ NMR Spectrum of 6 .....  | 43        |
| $^1\text{H}$ NMR Spectrum of 7 .....     | 44        |
| $^{13}\text{C}$ NMR Spectrum of 7 .....  | 44        |
| $^1\text{H}$ NMR Spectrum of 8 .....     | 45        |
| $^{13}\text{C}$ NMR Spectrum of 8 .....  | 45        |
| $^1\text{H}$ NMR Spectrum of 9 .....     | 46        |
| $^{13}\text{C}$ NMR Spectrum of 9 .....  | 46        |
| $^1\text{H}$ NMR Spectrum of 10 .....    | 47        |
| $^{13}\text{C}$ NMR Spectrum of 10 ..... | 47        |
| $^1\text{H}$ NMR Spectrum of 11 .....    | 48        |
| $^{13}\text{C}$ NMR Spectrum of 11 ..... | 48        |
| $^1\text{H}$ NMR Spectrum of 12 .....    | 49        |
| $^{13}\text{C}$ NMR Spectrum of 12 ..... | 49        |
| $^1\text{H}$ NMR Spectrum of 13 .....    | 50        |
| $^{13}\text{C}$ NMR Spectrum of 13 ..... | 50        |
| $^1\text{H}$ NMR Spectrum of 14 .....    | 51        |
| $^{13}\text{C}$ NMR Spectrum of 14 ..... | 51        |
| $^1\text{H}$ NMR Spectrum of 15 .....    | 52        |
| $^{13}\text{C}$ NMR Spectrum of 15 ..... | 52        |
| $^1\text{H}$ NMR Spectrum of 16 .....    | 53        |
| $^{13}\text{C}$ NMR Spectrum of 16 ..... | 53        |
| $^1\text{H}$ NMR Spectrum of 17 .....    | 54        |
| $^{13}\text{C}$ NMR Spectrum of 17 ..... | 54        |
| $^1\text{H}$ NMR Spectrum of 18 .....    | 55        |
| $^{13}\text{C}$ NMR Spectrum of 18 ..... | 55        |
| $^1\text{H}$ NMR Spectrum of 19 .....    | 56        |
| $^{13}\text{C}$ NMR Spectrum of 19 ..... | 56        |
| $^1\text{H}$ NMR Spectrum of 20 .....    | 57        |
| $^{13}\text{C}$ NMR Spectrum of 20 ..... | 57        |
| $^1\text{H}$ NMR Spectrum of 21 .....    | 58        |
| $^{13}\text{C}$ NMR Spectrum of 21 ..... | 58        |
| $^1\text{H}$ NMR Spectrum of 22 .....    | 59        |
| $^{13}\text{C}$ NMR Spectrum of 22 ..... | 59        |
| $^1\text{H}$ NMR Spectrum of 23 .....    | 60        |
| $^{13}\text{C}$ NMR Spectrum of 23 ..... | 60        |
| $^1\text{H}$ NMR Spectrum of 24 .....    | 61        |
| $^{13}\text{C}$ NMR Spectrum of 24 ..... | 61        |
| $^1\text{H}$ NMR Spectrum of 25 .....    | 62        |
| $^{13}\text{C}$ NMR Spectrum of 25 ..... | 62        |
| $^1\text{H}$ NMR Spectrum of 26 .....    | 63        |
| $^{13}\text{C}$ NMR Spectrum of 26 ..... | 63        |
| <b>References .....</b>                  | <b>64</b> |

## 1. General Information

All reactions were performed under a designated atmosphere with anhydrous solvent in flame-dried round bottom flasks, magnetically stirred, unless otherwise noted. All reactions were performed at room temperature (r.t., approximately 25 °C), unless otherwise noted. Preparative column chromatography was performed using silica gel 60, particle size 0.063–0.200 mm (70–230 mesh, flash). Analytical TLC was carried out employing silica gel 60 F254 plates (Merck, Darmstadt). Visualization of the developed chromatograms was performed with detection by UV (254 nm and 365 nm). Preparative thin layer chromatography (PTLC) separations were carried out on 0.20 mm Yantai Jiangyou silica gel plates (HSGF254).  $^1\text{H}$  and  $^{13}\text{C}$  nuclear magnetic resonance (NMR) spectra were recorded on a Bruker-400 ( $^1\text{H}$ , 400 MHz;  $^{13}\text{C}$ , 101 MHz) spectrometer in a suitable deuterated solvent. Chemical shifts for protons are reported in parts per million and are references to the NMR solvent peak ( $\text{CDCl}_3$ :  $\delta$  7.26;  $\text{DMSO}-d_6$ : 2.50). Chemical shifts for carbons are reported in parts per million and are referenced to the carbon resonances of the NMR solvent ( $\text{CDCl}_3$ :  $\delta$  77.16;  $\text{DMSO}-d_6$ : 39.52). Signals are listed in ppm, and multiplicity identified as s = singlet, d = doublet, t = triplet, q = quartet, m = multiplet. Chemical shifts were expressed in ppm, and  $J$  values were given in Hz. High resolution mass Spectrum (HRMS) were obtained from Thermo Fisher Scientific Exactive Plus mass spectrometer. Melting point was determined using the X-4A melting point apparatus (Shanghai Yidian Co., Ltd.) and uncorrected. Concentration under reduced pressure was performed by rotary evaporation at 25–35 °C at appropriate pressure. Purified compounds were further dried under high vacuum (0.01–0.10 Torr). Yields refer to purified and spectroscopically pure compounds, unless otherwise noted. All commercially available starting materials and solvents were reagent grade, and used without further purification.

Abbreviations used: TLC = thin layer chromatography; DMA = *N,N*-dimethylacetamide; DMF = dimethylformamide; DMSO = dimethyl sulfoxide; EtOAc = ethyl acetate; THF = tetrahydrofuran; NMA = *N*-methylacetamide; TEAPF<sub>6</sub> = tetraethylammonium hexafluorophosphate; TOAS = methyltrioctyl ammonium hydrogen sulfate; TMAC = tetrabutyl ammonium chloride; TBAC = tetrabutyl ammonium chloride; TEACl = tetraethylammonium Chloride; TMACl = tetramethylammonium chloride; TBAI = tetrabutylammonium iodide; TEAB = tetraethyl ammonium bromide; TBAF<sub>4</sub> = tetrabutylammonium tetrafluoroborate; 2-MeTHF = 2-methyltetra-hydrofuran; TBAC = *tert*-butyl acetate; AcOH = acetic acid; PE = petroleum ether; Vc = ascorbic acid; TEMPO = 2,2,6,6-tetramethylpiperidine-1-oxyl.

## 2. Optimization Studies

**Table S1:** Investigation of Additives

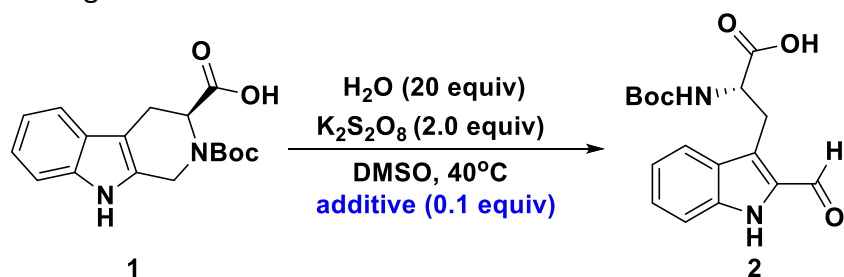

| Entry <sup>[a]</sup> | Additive     | Yield <sup>[b]</sup> | Entry | Additive           | Yield <sup>[b]</sup> |
|----------------------|--------------|----------------------|-------|--------------------|----------------------|
| 1                    | <b>TMACl</b> | <b>93</b>            | 6     | TBAF <sub>4</sub>  | <72                  |
| 2                    | TEACl        | <75                  | 7     | TMAC               | <78                  |
| 3                    | TBAI         | <70                  | 8     | TBAC               | <80                  |
| 4                    | TEAB         | <65                  | 9     | TEAPF <sub>6</sub> | <62                  |
| 5                    | TOAS         | <67                  | 10    | -                  | 66                   |

[a] Reaction conditions: Unless otherwise noted, all reactions were carried out with TH $\beta$ C **1** (0.1 mmol) in 1.0 mL of DMSO, different additive (0.1 equiv) and  $\text{K}_2\text{S}_2\text{O}_8$  (2.0 equiv) was added. Then  $\text{H}_2\text{O}$  (20 equiv) was added into the mixture. The reaction mixture was stirred for another 6 h. [b] All yields were determined by  $^1\text{H}$  NMR analysis of the crude products using 1,3,5-trimethoxybenzene as an internal standard.

**Table S2:** Investigation of oxidants

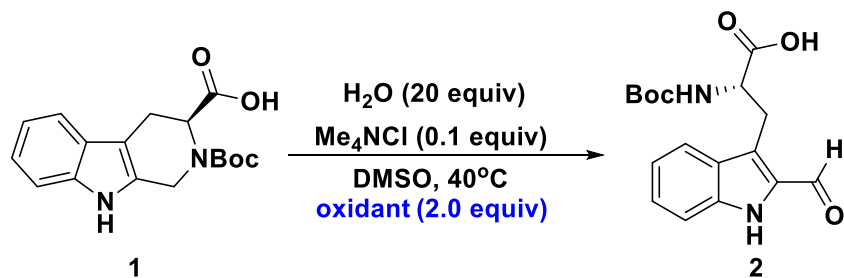

| Entry <sup>[a]</sup> | Oxidant                                                       | equiv    | Yield <sup>[b]</sup> |
|----------------------|---------------------------------------------------------------|----------|----------------------|
| 1                    | K <sub>2</sub> S <sub>2</sub> O <sub>8</sub>                  | 0        | 0                    |
| 2                    | K <sub>2</sub> S <sub>2</sub> O <sub>8</sub>                  | 1        | 82                   |
| <b>3</b>             | <b>K<sub>2</sub>S<sub>2</sub>O<sub>8</sub></b>                | <b>2</b> | <b>93</b>            |
| 4                    | K <sub>2</sub> S <sub>2</sub> O <sub>8</sub>                  | 5        | <90                  |
| 5                    | Na <sub>2</sub> S <sub>2</sub> O <sub>8</sub>                 | 1        | <70                  |
| 7                    | Na <sub>2</sub> S <sub>2</sub> O <sub>8</sub>                 | 2        | 82                   |
| 8                    | (NH <sub>4</sub> ) <sub>2</sub> S <sub>2</sub> O <sub>8</sub> | 1        | <30                  |
| 9                    | (NH <sub>4</sub> ) <sub>2</sub> S <sub>2</sub> O <sub>8</sub> | 2        | 38                   |

[a] Reaction conditions: Unless otherwise noted, all reactions were carried out with THβC **1** (0.1 mmol) in 1.0 mL of DMSO, different oxidant (0-5 equiv), Me<sub>4</sub>NCl (0.1 equiv) was added. Then H<sub>2</sub>O (20 equiv) was added into the mixture. The reaction mixture was stirred for another 6 h. [b] All yields were determined by <sup>1</sup>H NMR analysis of the crude products using 1,3,5-trimethoxybenzene as an internal standard.

**Table S3:** Investigation of solvents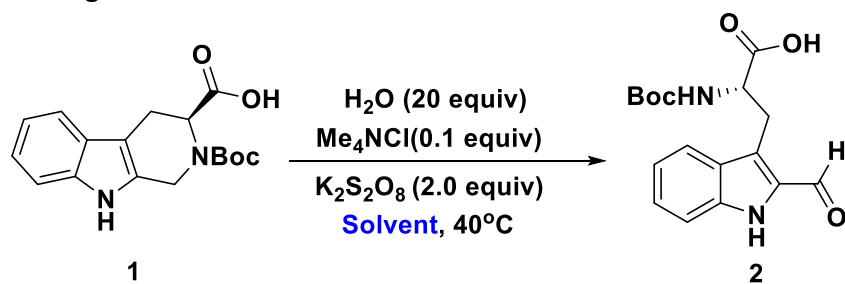

| Entry <sup>[a]</sup> | Solvent            | Yield <sup>[b]</sup> | Entry     | Solvent                              | Yield <sup>[b]</sup> |
|----------------------|--------------------|----------------------|-----------|--------------------------------------|----------------------|
| 1                    | DMF                | trace                | 9         | NMR                                  | <35                  |
| 2                    | 2-MeTHF            | <30                  | 10        | EtOAc                                | trace                |
| 3                    | MeOAc              | <50                  | 11        | DMA                                  | 46                   |
| 4                    | THF                | trace                | 12        | CH <sub>2</sub> ClCH <sub>2</sub> Cl | trace                |
| 5                    | CH <sub>3</sub> CN | trace                | <b>13</b> | <b>DMSO</b>                          | <b>93</b>            |
| 6                    | DMF                | trace                | 14        | H <sub>2</sub> O                     | trace                |
| 7                    | CHCl <sub>3</sub>  | <60                  | 15        | MeOH                                 | <40                  |
| 8                    | EtOH               | trace                | 16        | CHCl <sub>2</sub>                    | <30                  |

[a] Reaction conditions: Unless otherwise noted, all reactions were carried out with TH $\beta$ C **1** (0.1 mmol) in different solvent (1 mL), Me<sub>4</sub>NCl (0.1 equiv) and Na<sub>2</sub>S<sub>2</sub>O<sub>8</sub> (2.0 equiv) was added. Then H<sub>2</sub>O (20 equiv) was added into the mixture. The reaction mixture was stirred for another 6 h. [b] All yields were determined by <sup>1</sup>H NMR analysis of the crude products using 1,3,5-trimethoxybenzene as an internal standard.

**Table S4:** Investigation of H<sub>2</sub>O

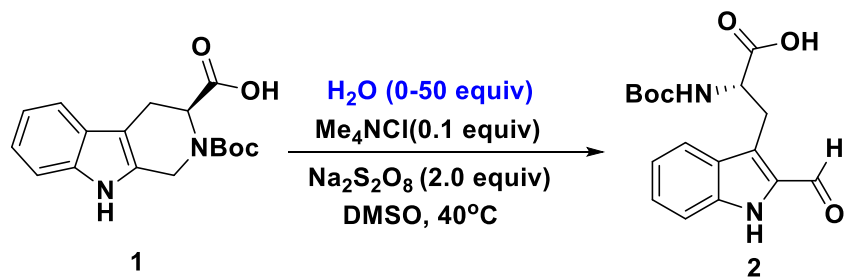

| Entry <sup>[a]</sup> | H <sub>2</sub> O (equiv) | Yield <sup>[b]</sup> | Entry    | H <sub>2</sub> O (equiv) | Yield <sup>[b]</sup> |
|----------------------|--------------------------|----------------------|----------|--------------------------|----------------------|
| 1                    | 0                        | 0                    | 4        | 10                       | 82                   |
| 2                    | 1                        | <56                  | <b>5</b> | <b>20</b>                | <b>93</b>            |
| 3                    | 5                        | 75                   | 6        | 50                       | <88                  |

[a] Reaction conditions: Unless otherwise noted, all reactions were carried out with THβC **1** (0.1 mmol) in DMSO (1 mL), Me<sub>4</sub>NCl (0.1 equiv) and Na<sub>2</sub>S<sub>2</sub>O<sub>8</sub> (2.0 equiv) was added. Then H<sub>2</sub>O (0-50 equiv) was added into the mixture. The reaction mixture was stirred for another 6 h. [b] All yields were determined by <sup>1</sup>H NMR analysis of the crude products using 1,3,5-trimethoxybenzene as an internal standard.



### 3. Graphical Procedure for Gram-scale Preparation of 25

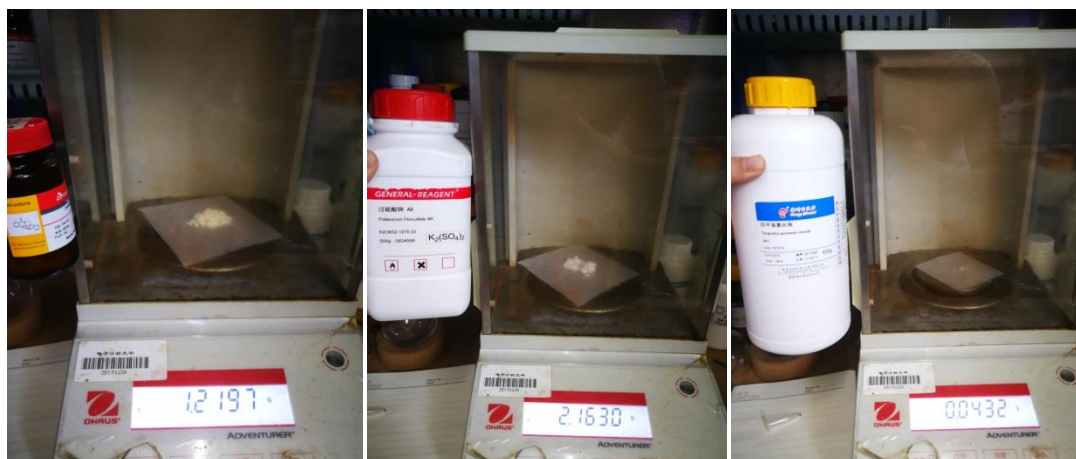

**(Left)** Evodiamine (1.21 g, 4 mmol); **(Center)**  $\text{Na}_2\text{S}_2\text{O}_8$  (2.16 g, 8 mmol); **(Right)**  $\text{Me}_4\text{NCl}$  (43 mg, 0.4 mmol).

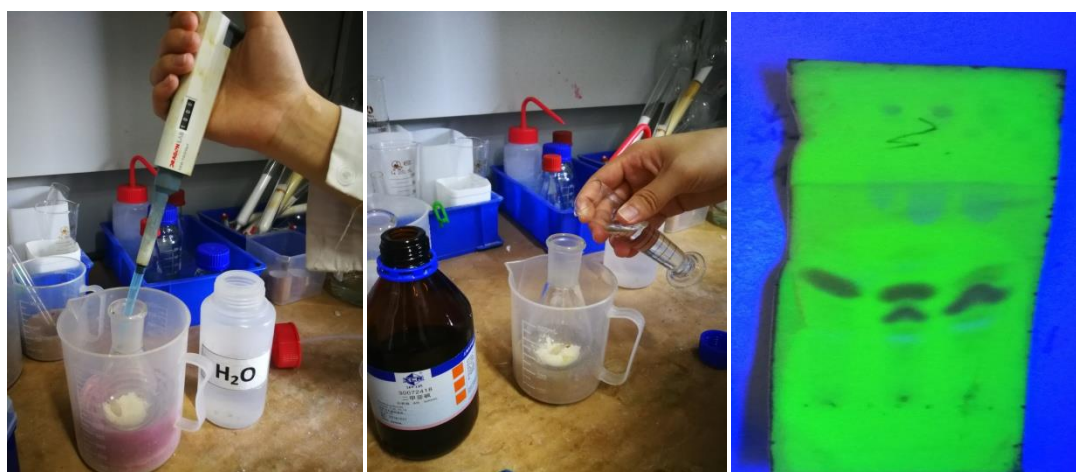

**(Left)** Addition of  $\text{H}_2\text{O}$  (1.4 mL, 80 mmol); **(Center)** Dissolved in DMSO (25 mL); **(Right)** TLC under UV (PE/EtOAc = 2:1).

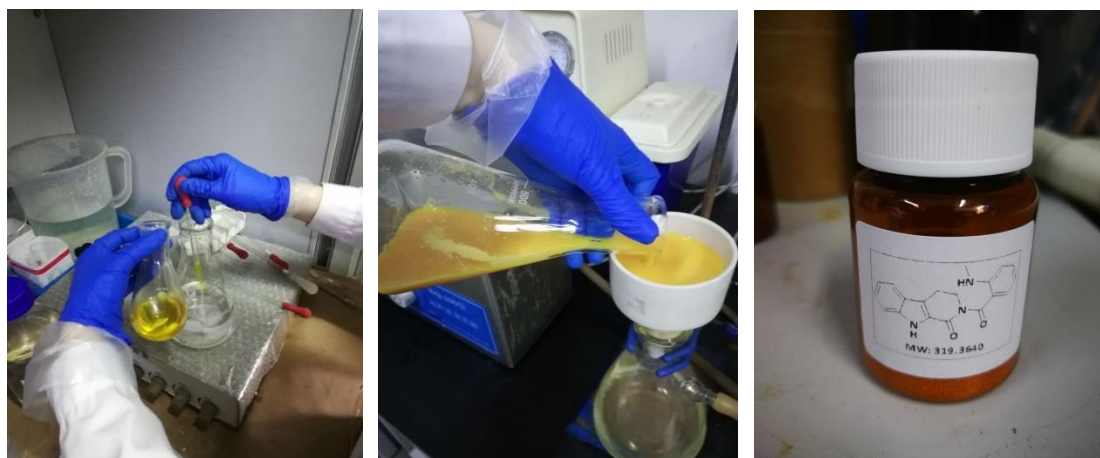

**(Left)** The reaction mixture was diluted with water (100 mL); **(Center)** Purified by filtered; **(Right)** Product after filtered.

#### 4. Graphical Procedure for Gram-scale Preparation of 2

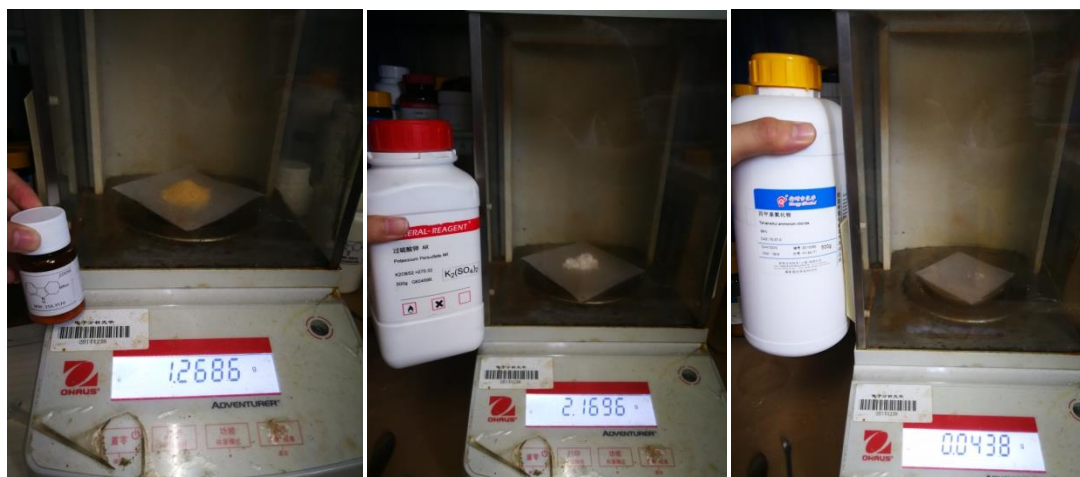

**(Left)** **1** (1.26 g, 4 mmol); **(Center)**  $\text{Na}_2\text{S}_2\text{O}_8$  (2.16 g, 8 mmol); **(Right)**  $\text{Me}_4\text{NCl}$  (43 mg, 0.4 mmol).

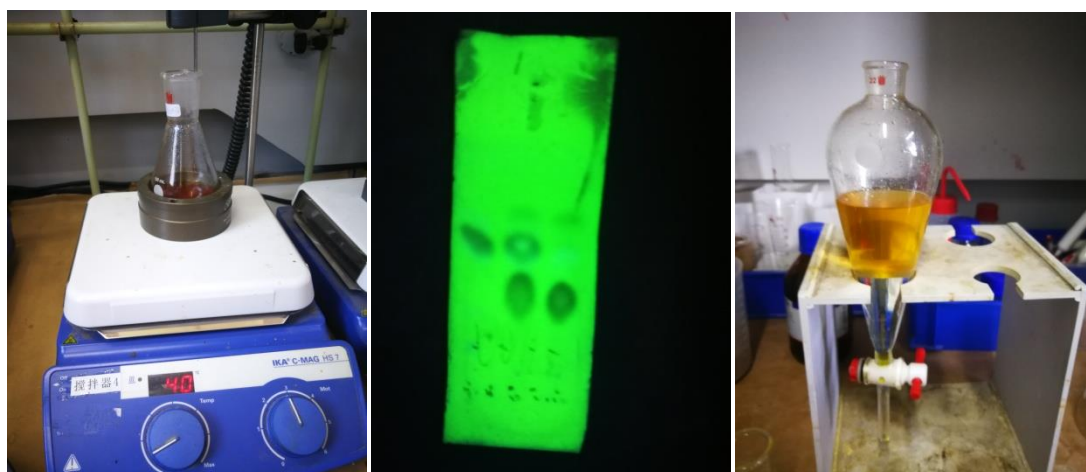

**(Left)** Stirred at 40 °C for 10 h; **(Center)** TLC under UV (PE/EtOAc = 2:1); **(Right)** Extracted with EtOAc and  $\text{H}_2\text{O}$ .

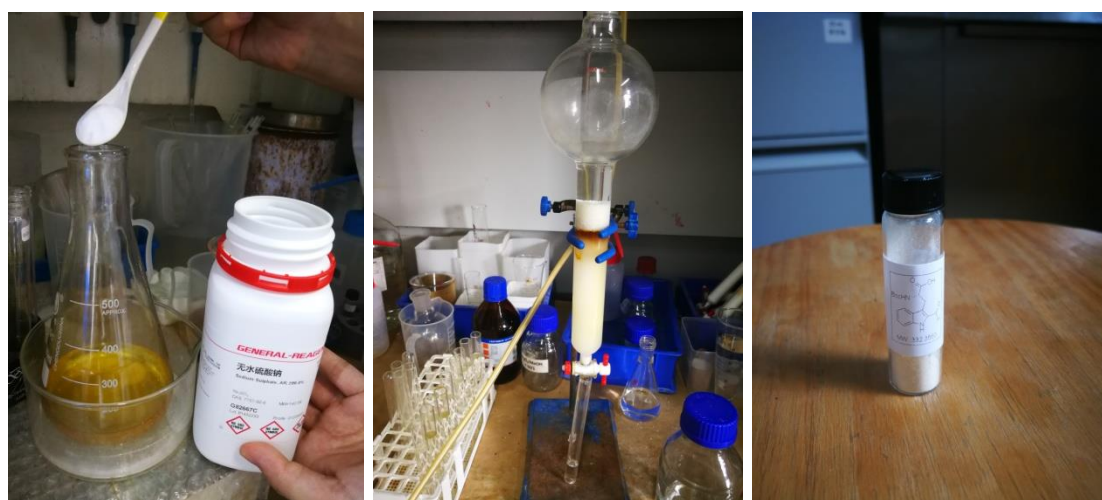

**(Left)** dried with  $\text{Na}_2\text{SO}_4$ ; **(Center)** Purified by chromatography on silica gel (PE/EtOAc = 2:1); **(Right)** Product after column chromatography.

## 5. Mechanism Studies

**Table S5:** Investigation of the free radical inhibitor

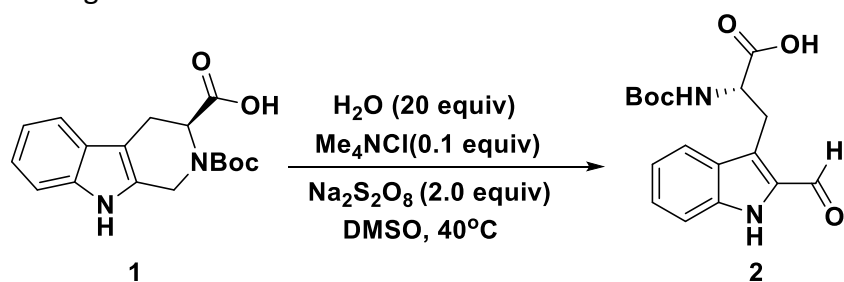

| Entry <sup>[a]</sup> | Inhibitor | equiv | Yield <sup>[b]</sup> |
|----------------------|-----------|-------|----------------------|
| 1                    | Vc        | 2     | 0                    |
| 2                    | TEMPO     | 2     | 0                    |

[a] Reaction conditions: Unless otherwise noted, all reactions were carried out with TH $\beta$ C **1** (0.1 mmol) in DMSO (1 mL), Me<sub>4</sub>NCl (0.1 equiv) and Inhibitor was added. Then H<sub>2</sub>O (0-50 equiv) was added into the mixture. The reaction mixture was stirred for another 6 h. [b] All yields were determined by <sup>1</sup>H NMR analysis of the crude products.

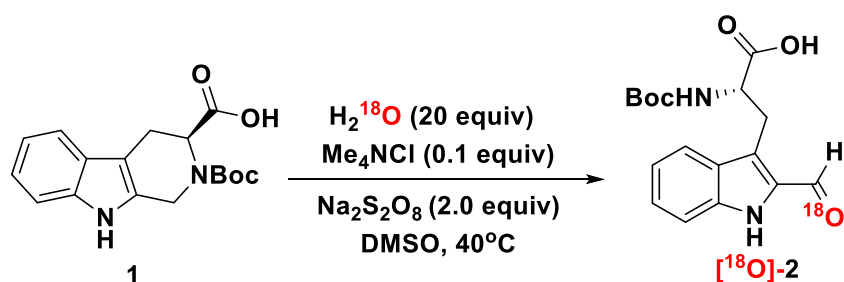

To a solution of TH $\beta$ C **1** (32 mg, 0.1 mmol) in DMSO (1 mL) was added K<sub>2</sub>S<sub>2</sub>O<sub>8</sub> (54 mg, 0.2 mmol). The reaction mixture was stirred at 40 °C. for 1 min, then NMe<sub>4</sub>Cl (1 mg, 0.01 mmol) and H<sub>2</sub><sup>18</sup>O (36  $\mu$ L, 2 mmol) was added into the mixture. After stirring for 7 h, the reaction mixture was diluted with EtOAc (50 mL) and extracted with saturated NaHCO<sub>3</sub> (5 mL), The combined organic layers were washed with saturated brine, dried over anhydrous Na<sub>2</sub>SO<sub>4</sub>, filtered, and concentrated under reduced pressure to afford the crude product, which was purified by silica gel chromatography (PE/EtOAc = 1:2) to give the desired product (28 mg, 84%) as a white solid.

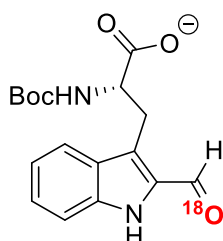

Exact Mass: 333.1342

**Found: 333.1348**

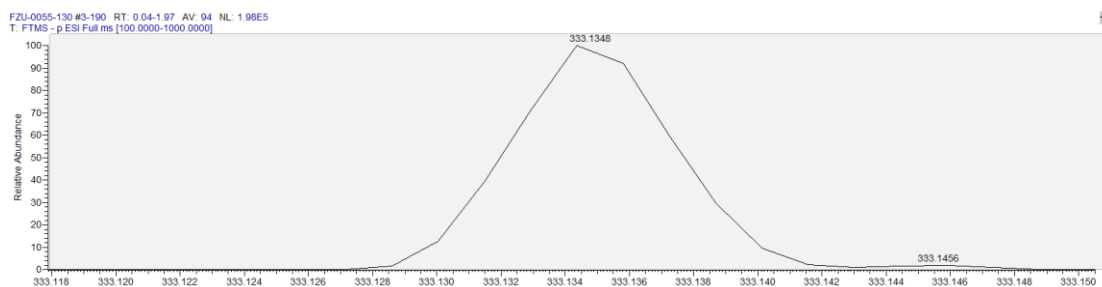

**Figure S1.** HRMS of **[<sup>18</sup>O]-2**.

## 6. General Procedures

### Compound 2

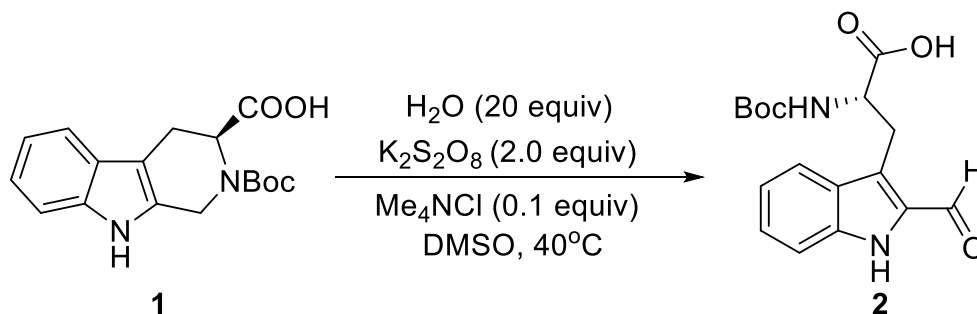

#### 2-((tert-butoxycarbonyl)amino)-3-(2-formyl-1H-indol-3-yl)propanoic acid

To a solution of (*S*)-2-(tert-butoxycarbonyl)-2,3,4,9-tetrahydro-1H-pyrido[3,4-*b*]indole-3-carboxylic acid (316 mg, 1 mmol) in DMSO (6 mL) was added K<sub>2</sub>S<sub>2</sub>O<sub>8</sub> (540 mg, 2 mmol). The reaction mixture was stirred at 40 °C. for 1 min, then NMe<sub>4</sub>Cl (11 mg, 0.1 mmol) and H<sub>2</sub>O (360 μL, 20 mmol) was added into the mixture. After stirring for 7 h, the reaction mixture was diluted with EtOAc (20 mL) and extracted with saturated NaHCO<sub>3</sub> (20 mL), The combined organic layers were washed with saturated brine, dried over anhydrous Na<sub>2</sub>SO<sub>4</sub>, filtered, and concentrated under reduced pressure to afford the crude product, which was purified by silica gel chromatography (PE/EtOAc = 1:2) to give the desired product (298 mg, 90%) as a white solid.

#### Gram-scale preparation of 2

To a solution of (*S*)-2-(tert-butoxycarbonyl)-2,3,4,9-tetrahydro-1H-pyrido[3,4-*b*]indole-3-carboxylic acid (1.26 g, 4 mmol) in DMSO (20 mL) was added K<sub>2</sub>S<sub>2</sub>O<sub>8</sub> (2.16 g, 8 mmol). The reaction mixture was stirred at 40 °C. for 1 min, then NMe<sub>4</sub>Cl (44 mg, 0.4 mmol) and H<sub>2</sub>O (1.4 mL, 80 mmol) was added into the mixture. After stirring for 10 h, the reaction mixture was diluted with EtOAc (200 mL) and extracted with saturated NaHCO<sub>3</sub> (200 mL), The combined organic layers were washed with saturated brine, dried over anhydrous Na<sub>2</sub>SO<sub>4</sub>, filtered, and concentrated under reduced pressure to afford the crude product, which was purified by silica gel chromatography (PE/EtOAc = 1:2) to give the desired product (1.15 g, 87%) as a white solid.

**Physical State:** white solid.

**Melting Point:** 151.3 – 152.5 °C.

**TLC:** R<sub>f</sub> = 0.21 (PE/EtOAc = 1:2).

**<sup>1</sup>H NMR (400 MHz, DMSO-*d*<sub>6</sub>)** δ 12.73 (s, 1H), 11.69 (s, 1H), 9.98 (s, 1H), 7.77 (d, *J* = 8.1 Hz, 1H), 7.42 (d, *J* = 8.2 Hz, 1H), 7.33 (t, *J* = 7.5 Hz, 1H), 7.22 – 7.01 (m, 2H), 4.27 – 4.14 (m, 1H), 3.58 – 3.48 (m, 1H), 3.43 – 3.37 (m, 1H), 1.29 (s, 9H).

**<sup>13</sup>C NMR (101 MHz, DMSO-*d*<sub>6</sub>)** δ 182.62, 173.53, 155.70, 138.06, 133.76, 127.44, 126.89, 123.51, 121.52, 120.41, 113.26, 78.63, 55.17, 28.52 (3C), 25.96.

**HRMS (ESI):** calcd for C<sub>17</sub>H<sub>20</sub>N<sub>2</sub>O<sub>5</sub> [M + H]<sup>+</sup> *m/z* 333.1445, found 333.1420.

### Compound 3

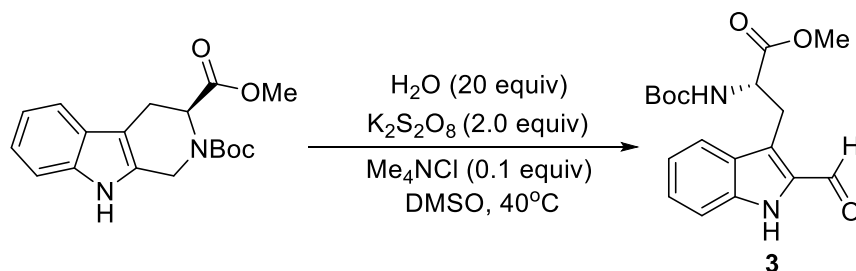

#### ***Methyl (S)-2-((tert-butoxycarbonyl)amino)-3-(2-formyl-1H-indol-3-yl)propanoate***

To a solution of 2-(tert-butyl) 3-methyl (R)-1,3,4,9-tetrahydro-2H-pyrido[3,4-b]indole-2,3-dicarboxylate (330 mg, 1 mmol) in DMSO (6 mL) was added  $K_2S_2O_8$  (540 mg, 2 mmol). The reaction mixture was stirred at 40 °C for 1 min, then  $NMe_4Cl$  (11 mg, 0.1 mmol) and  $H_2O$  (360  $\mu$ L, 20 mmol) was added into the mixture. After stirring for 8 h, the reaction mixture was diluted with EtOAc (20 mL) and extracted with saturated  $NaHCO_3$  (20 mL). The combined organic layers were washed with saturated brine, dried over anhydrous  $Na_2SO_4$ , filtered, and concentrated under reduced pressure to afford the crude product, which was purified by silica gel chromatography (PE/EtOAc = 2:1) to give the desired product (253 mg, 73%) as a white solid.

**Physical State:** white solid.

**Melting Point:** 147.2 - 147.8 °C.

**TLC:**  $R_f$  = 0.55 (PE/EtOAc = 2:1).

**$^1H$  NMR (400 MHz,  $CDCl_3$ )**  $\delta$  9.89 (s, 1H), 9.12 (s, 1H), 7.71 (d,  $J$  = 8.0 Hz, 1H), 7.41 (s, 2H), 7.21 – 7.17 (m, 1H), 5.25 (d,  $J$  = 6.6 Hz, 1H), 4.80 – 4.74 (m, 1H), 3.67 (s, 3H), 3.67 – 3.63 (m, 2H), 1.47 (s, 9H).

**$^{13}C$  NMR (101 MHz,  $CDCl_3$ )**  $\delta$  181.07, 171.68, 154.97, 137.46, 133.36, 127.71, 127.51, 121.99, 121.35, 120.85, 112.56, 80.27, 54.36, 52.53, 28.27 (3C), 26.83.

**HRMS (ESI):** calcd for  $C_{18}H_{22}N_2O_5$   $[M + H]^+$   $m/z$  347.1601, found 347.1588.



#### Compound 4

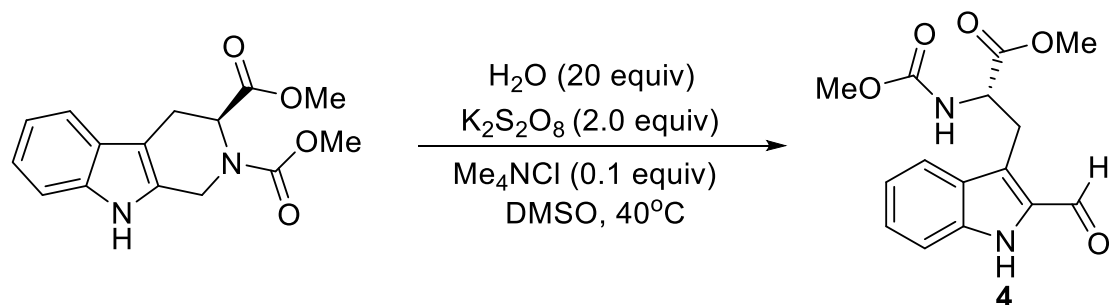

#### **Methyl 3-(2-formyl-1H-indol-3-yl)-2-((methoxycarbonyl)amino)propanoate**

To a solution of dimethyl 1,3,4,9-tetrahydro-2H-pyrido[3,4-b]indole-2,3-dicarboxylate (144 mg, 0.5 mmol) in DMSO (6 mL) was added K<sub>2</sub>S<sub>2</sub>O<sub>8</sub> (270 mg, 1 mmol). The reaction mixture was stirred at 40 °C. for 1 min, then Me<sub>4</sub>NCl (6 mg, 0.05 mmol) and H<sub>2</sub>O (180 μL, 10 mmol) was added into the mixture. After stirring for 8 h, the reaction mixture was diluted with EtOAc (20 mL) and extracted with saturated NaHCO<sub>3</sub> (20 mL), The combined organic layers were washed with saturated brine, dried over anhydrous Na<sub>2</sub>SO<sub>4</sub>, filtered, and concentrated under reduced pressure to afford the crude product, which was purified by silica gel chromatography (PE/EtOAc = 2:1) to give the desired product (118 mg, 78%) as a white solid.

**Physical State:** white solid.

**Melting Point:** 128.3 - 129.8 °C.

**TLC:** R<sub>f</sub> = 0.30 (PE/EtOAc = 2:1).

**<sup>1</sup>H NMR (400 MHz, CDCl<sub>3</sub>)** δ 9.88 (s, 1H), 9.63 (s, 1H), 7.69 (d, *J* = 8.2 Hz, 1H), 7.35 (s, 2H), 7.19 – 7.14 (m, 1H), 5.69 (d, *J* = 7.5 Hz, 1H), 4.90 – 4.80 (m, 1H), 3.70 (s, 3H), 3.67 (s, 3H), 3.65 (s, 2H).

**<sup>13</sup>C NMR (101 MHz, CDCl<sub>3</sub>)** δ 181.09, 171.72, 156.44, 137.52, 133.23, 127.56 (2C), 121.76, 121.14, 120.94, 112.65, 54.84, 52.63 (2C), 26.90.

**HRMS (ESI):** calcd for C<sub>15</sub>H<sub>16</sub>N<sub>2</sub>O<sub>5</sub> [M + H]<sup>+</sup> *m/z* 305.1132, found 305.1124.

## Compound 5

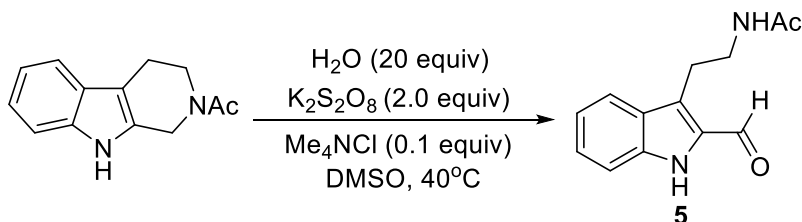

### ***N*-(2-(2-formyl-1H-indol-3-yl)ethyl)acetamide**

To a solution of 1-(1,3,4,9-tetrahydro-2H-pyrido[3,4-b]indol-2-yl)ethan-1-one (214 mg, 1 mmol) in DMSO (6 mL) was added K<sub>2</sub>S<sub>2</sub>O<sub>8</sub> (540 mg, 2 mmol). The reaction mixture was stirred at 40 °C. for 1 min, then NMe<sub>4</sub>Cl (11 mg, 0.1 mmol) and H<sub>2</sub>O (360 μL, 20 mmol) was added into the mixture. After stirring for 5 h, the reaction mixture was diluted with EtOAc (20 mL) and extracted with saturated NaHCO<sub>3</sub> (20 mL), The combined organic layers were washed with saturated brine, dried over anhydrous Na<sub>2</sub>SO<sub>4</sub>, filtered, and concentrated under reduced pressure to afford the crude product, which was purified by silica gel chromatography (CH<sub>2</sub>Cl<sub>2</sub>/MeOH = 10:1) to give the desired product (180 mg, 80%) as a white solid.

**Physical State:** white solid.

**Melting Point:** 111.2 – 112.5 °C.

**TLC:** R<sub>f</sub> = 0.26 (PE/EtOAc = 1:2).

**<sup>1</sup>H NMR (400 MHz, DMSO-*d*<sub>6</sub>)** δ 11.68 (s, 1H), 9.95 (s, 1H), 8.01 (s, 1H), 7.77 (d, *J* = 8.1 Hz, 1H), 7.43 (d, *J* = 8.3 Hz, 1H), 7.33 (t, *J* = 7.6 Hz, 1H), 7.11 (t, *J* = 7.5 Hz, 1H), 3.36 – 3.32 (m, 2H), 3.21 (t, *J* = 6.6 Hz, 2H), 1.77 (s, 3H).

**<sup>13</sup>C NMR (101 MHz, DMSO-*d*<sub>6</sub>)** δ 181.98, 169.80, 138.21, 133.24, 127.45, 127.05, 125.65, 121.57, 120.34, 113.26, 40.80, 23.84, 23.01.

**HRMS (ESI):** calcd for C<sub>13</sub>H<sub>14</sub>N<sub>2</sub>O<sub>2</sub> [M + H]<sup>+</sup> *m/z* 231.1128, found 231.1121.



## Compound 6

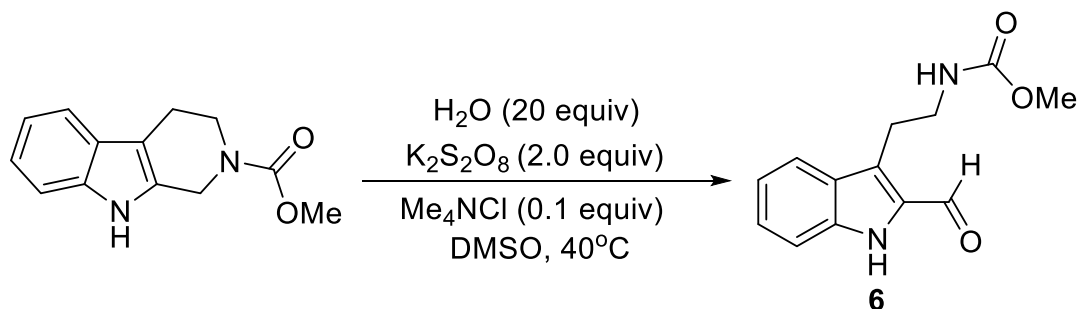

### **Methyl (2-(2-formyl-1H-indol-3-yl)ethyl)carbamate**

To a solution of *methyl 1,3,4,9-tetrahydro-2H-pyrido[3,4-b]indole-2-carboxylate* (230 mg, 1 mmol) in DMSO (6 mL) was added K<sub>2</sub>S<sub>2</sub>O<sub>8</sub> (540 mg, 2 mmol). The reaction mixture was stirred at 40 °C. for 1 min, then NMe<sub>4</sub>Cl (11 mg, 0.1 mmol) and H<sub>2</sub>O (360 μL, 20 mmol) was added into the mixture. After stirring for 5 h, the reaction mixture was diluted with EtOAc (20 mL) and extracted with saturated NaHCO<sub>3</sub> (20 mL), The combined organic layers were washed with saturated brine, dried over anhydrous Na<sub>2</sub>SO<sub>4</sub>, filtered, and concentrated under reduced pressure to afford the crude product, which was purified by silica gel chromatography (PE/EtOAc = 2:1) to give the desired product (209 mg, 85%) as a white solid.

**Physical State:** white solid.

**Melting Point:** 125.3 – 126.5 °C.

**TLC:** R<sub>f</sub> = 0.33 (PE/EtOAc = 2:1).

**<sup>1</sup>H NMR (400 MHz, CDCl<sub>3</sub>)** δ 9.92 (s, 1H), 9.70 (s, 1H), 7.74 – 7.69 (m, 1H), 7.42 (d, *J* = 8.2 Hz, 1H), 7.36 (t, *J* = 7.5 Hz, 1H), 7.14 (t, *J* = 7.4 Hz, 1H), 5.08 (s, 1H), 3.66 (s, 3H), 3.55 – 3.49 (m, 2H), 3.31 (t, *J* = 6.0 Hz, 2H).

**<sup>13</sup>C NMR (101 MHz, CDCl<sub>3</sub>)** δ 180.81, 157.18, 137.86, 132.84, 127.64, 127.34, 125.72, 121.23, 120.76, 112.70, 52.21, 42.26, 24.33.

**HRMS (ESI):** calcd for C<sub>13</sub>H<sub>14</sub>N<sub>2</sub>O<sub>3</sub> [M + H]<sup>+</sup> *m/z* 247.1077, found 247.1071.

## Compound 7

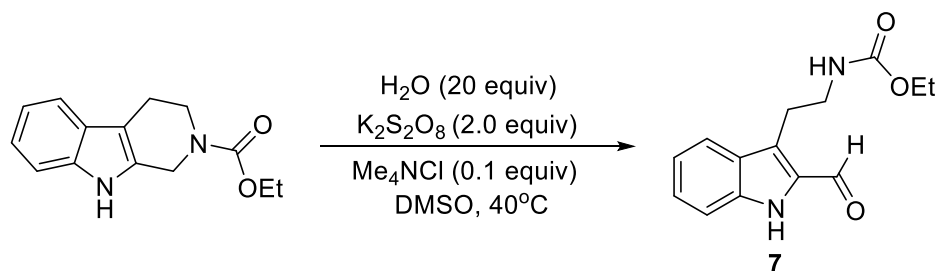

### *N*-(2-(2-formyl-1H-indol-3-yl)ethyl)propionamide

To a solution of 1-(1,3,4,9-tetrahydro-2H-pyrido[3,4-b]indol-2-yl)propan-1-one (244 mg, 1 mmol) in DMSO (6 mL) was added  $K_2S_2O_8$  (540 mg, 2 mmol). The reaction mixture was stirred at 40 °C. for 1 min, then  $NMe_4Cl$  (11 mg, 0.1 mmol) and  $H_2O$  (360  $\mu$ L, 20 mmol) was added into the mixture. After stirring for 5 h, the reaction mixture was diluted with EtOAc (20 mL) and extracted with saturated  $NaHCO_3$  (20 mL), The combined organic layers were washed with saturated brine, dried over anhydrous  $Na_2SO_4$ , filtered, and concentrated under reduced pressure to afford the crude product, which was purified by silica gel chromatography (PE/EtOAc = 2:1) to give the desired product (182 mg, 70%) as a white solid.

**Physical State:** white solid.

**Melting Point:** 117.5 – 118.6 °C.

**TLC:**  $R_f$  = 0.40 (PE/EtOAc = 2:1).

**$^1H$  NMR (400 MHz,  $CDCl_3$ )**  $\delta$  10.10 (s, 1H), 9.89 (s, 1H), 7.68 (d,  $J$  = 8.0 Hz, 1H), 7.41 (d,  $J$  = 8.3 Hz, 1H), 7.33 (d,  $J$  = 7.2 Hz, 1H), 7.09 (t,  $J$  = 7.4 Hz, 1H), 5.23 (s, 1H), 4.15 – 4.08 (m, 2H), 3.51 – 3.46 (m, 2H), 3.26 (t,  $J$  = 6.1 Hz, 2H), 1.22 – 1.17 (m, 3H).

**$^{13}C$  NMR (101 MHz,  $CDCl_3$ )**  $\delta$  181.02, 156.90, 138.06, 132.85, 127.54, 127.32, 126.02, 121.21, 120.62, 112.81, 60.92, 42.19, 24.29, 14.64.

**HRMS (ESI):** calcd for  $C_{14}H_{16}N_2O_3$   $[M + H]^+$   $m/z$  261.1234, found 261.1226.

## Compound 8

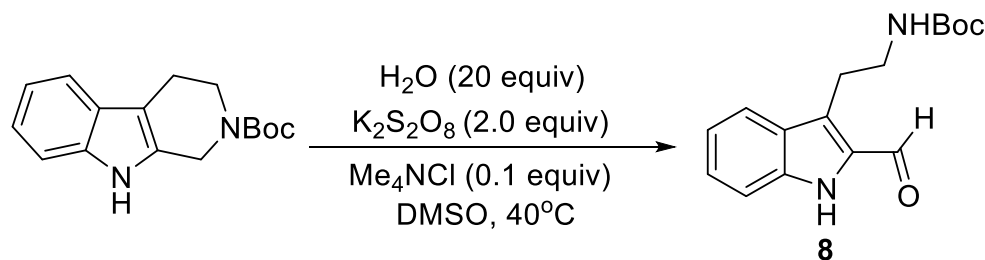

### ***Tert-butyl (2-(2-formyl-1H-indol-3-yl)ethyl)carbamate***

To a solution of *tert-butyl 1,3,4,9-tetrahydro-2H-pyrido[3,4-b]indole-2-carboxylate* (136 mg, 0.5 mmol) in DMSO (4 mL) was added  $\text{K}_2\text{S}_2\text{O}_8$  (270 mg, 1 mmol). The reaction mixture was stirred at 40 °C. for 1 min, then  $\text{NMe}_4\text{Cl}$  (6 mg, 0.05 mmol) and  $\text{H}_2\text{O}$  (180  $\mu\text{L}$ , 10 mmol) was added into the mixture. After stirring for 4 h, the reaction mixture was diluted with EtOAc (20 mL) and extracted with saturated  $\text{NaHCO}_3$  (20 mL), The combined organic layers were washed with saturated brine, dried over anhydrous  $\text{Na}_2\text{SO}_4$ , filtered, and concentrated under reduced pressure to afford the crude product, which was purified by silica gel chromatography (PE/EtOAc = 2:1) to give the desired product (98 mg, 68%) as a white solid.

**Physical State:** white solid.

**Melting Point:** 144.9 – 145.6 °C.

**TLC:**  $R_f$  = 0.34 (PE/EtOAc = 2:1).

**$^1\text{H}$  NMR (400 MHz,  $\text{CDCl}_3$ )**  $\delta$  9.94 (s, 1H), 9.56 (s, 1H), 7.72 (d,  $J$  = 8.1 Hz, 1H), 7.43 (d,  $J$  = 8.3 Hz, 2H), 7.37 (d,  $J$  = 7.8 Hz, 1H), 7.14 (t,  $J$  = 7.2 Hz, 2H), 4.74 (s, 1H), 3.50 – 3.42 (m, 4H), 3.29 (t,  $J$  = 7.1 Hz, 3H), 1.44 (s, 13H).

**$^{13}\text{C}$  NMR (101 MHz,  $\text{CDCl}_3$ )**  $\delta$  180.84, 155.95, 137.82, 132.96, 127.59, 127.40, 125.96, 121.33, 120.69, 112.62, 79.54, 41.78, 28.37 (3C), 24.25.

**HRMS (ESI):** calcd for  $\text{C}_{16}\text{H}_{20}\text{N}_2\text{O}_3$   $[\text{M} + \text{H}]^+$   $m/z$  289.1547, found 289.1526.

## Compound 9

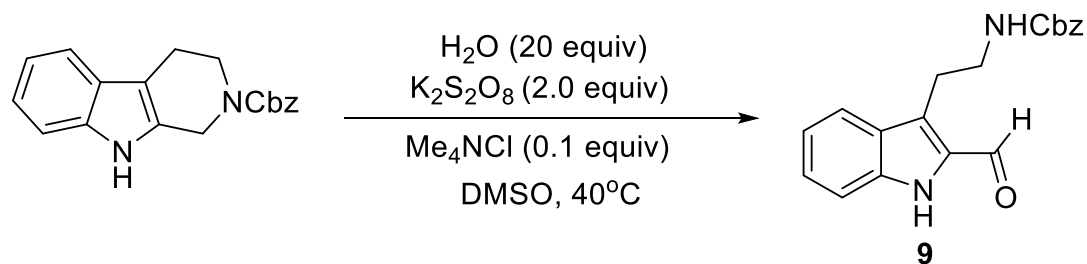

### ***Benzyl (2-(2-formyl-1H-indol-3-yl)ethyl)carbamate***

To a solution of *benzyl 1,3,4,9-tetrahydro-2H-pyrido[3,4-b]indole-2-carboxylate* (153 mg, 0.5 mmol) in DMSO (4 mL) was added  $\text{K}_2\text{S}_2\text{O}_8$  (270 mg, 1 mmol). The reaction mixture was stirred at  $40^\circ\text{C}$ . for 1 min, then  $\text{NMe}_4\text{Cl}$  (6 mg, 0.05 mmol) and  $\text{H}_2\text{O}$  (180  $\mu\text{L}$ , 10 mmol) was added into the mixture. After stirring for 4 h, the reaction mixture was diluted with EtOAc (20 mL) and extracted with saturated  $\text{NaHCO}_3$  (20 mL). The combined organic layers were washed with saturated brine, dried over anhydrous  $\text{Na}_2\text{SO}_4$ , filtered, and concentrated under reduced pressure to afford the crude product, which was purified by silica gel chromatography (PE/EtOAc = 2:1) to give the desired product (105 mg, 65%) as a white solid.

**Physical State:** white solid.

**Melting Point:**  $142.5 - 143.8^\circ\text{C}$ .

**TLC:**  $R_f = 0.47$  (PE/EtOAc = 2:1).

**$^1\text{H}$  NMR (400 MHz,  $\text{DMSO}-d_6$ )**  $\delta$  11.68 (s, 1H), 9.98 (s, 1H), 7.76 (d,  $J = 7.9$  Hz, 1H), 7.42 (d,  $J = 8.2$  Hz, 2H), 7.36 – 7.28 (m, 6H), 7.08 (t,  $J = 7.2$  Hz, 1H), 4.99 (s, 2H), 3.34 – 3.30 (m, 2H), 3.25 (t,  $J = 5.6$  Hz, 2H).

**$^{13}\text{C}$  NMR (101 MHz,  $\text{DMSO}-d_6$ )**  $\delta$  182.00, 156.62, 138.21, 137.68, 133.28, 128.79 (2C), 128.17, 128.04 (2C), 127.53, 126.99, 125.34, 121.57, 120.32, 113.26, 65.62, 42.47, 24.17.

**HRMS (ESI):** calcd for  $\text{C}_{19}\text{H}_{18}\text{N}_2\text{O}_3$   $[\text{M} + \text{H}]^+$   $m/z$  323.1390, found 323.1379.

## Compound 10

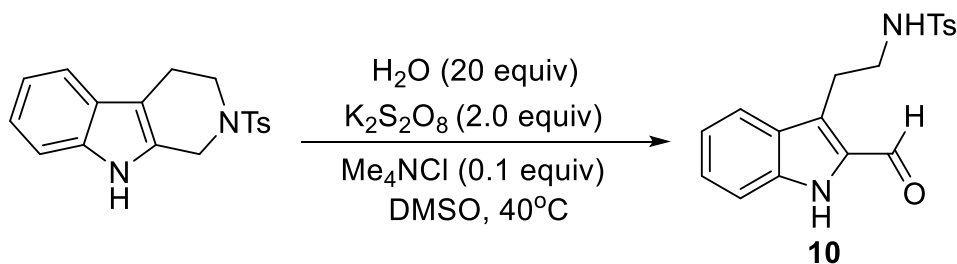

### *N*-(2-(2-formyl-1H-indol-3-yl)ethyl)-4-methylbenzenesulfonamide

To a solution of 2-tosyl-2,3,4,9-tetrahydro-1H-pyrido[3,4-b]indole (326 mg, 1 mmol) in DMSO (6 mL) was added K<sub>2</sub>S<sub>2</sub>O<sub>8</sub> (540 mg, 2 mmol). The reaction mixture was stirred at 40 °C. for 1 min, then NMe<sub>4</sub>Cl (11 mg, 0.1 mmol) and H<sub>2</sub>O (360 μL, 20 mmol) was added into the mixture. After stirring for 5 h, the reaction mixture was diluted with EtOAc (20 mL) and extracted with saturated NaHCO<sub>3</sub> (20 mL), The combined organic layers were washed with saturated brine, dried over anhydrous Na<sub>2</sub>SO<sub>4</sub>, filtered, and concentrated under reduced pressure to afford the crude product, which was purified by silica gel chromatography (PE/EtOAc = 2:1) to give the desired product (273 mg, 80%) as a white solid.

**Physical State:** white solid.

**Melting Point:** 126.3 – 127.1 °C.

**TLC:** R<sub>f</sub> = 0.34 (PE/EtOAc = 2:1).

**<sup>1</sup>H NMR (400 MHz, CDCl<sub>3</sub>)** δ 9.81 (s, 1H), 9.61 (s, 1H), 7.70 (d, *J* = 7.4 Hz, 2H), 7.60 (d, *J* = 8.1 Hz, 1H), 7.44 (d, *J* = 8.0 Hz, 1H), 7.38 (t, *J* = 7.4 Hz, 1H), 7.25 (d, *J* = 7.9 Hz, 2H), 7.12 (t, *J* = 7.4 Hz, 1H), 5.55 (s, 1H), 3.41 – 3.35 (m, 2H), 3.33 (t, *J* = 5.1 Hz, 2H), 2.40 (s, 3H).

**<sup>13</sup>C NMR (101 MHz, DMSO-*d*<sub>6</sub>)** δ 182.24, 143.01, 138.13, 137.98, 133.26, 130.01, 127.22, 126.93, 126.90, 124.35, 121.38, 120.37, 113.29, 44.32, 24.37, 21.42.

**HRMS (ESI):** calcd for C<sub>18</sub>H<sub>18</sub>N<sub>2</sub>O<sub>3</sub>S [M + H]<sup>+</sup> *m/z* 343.1111, found 343.1099.

## Compound 11

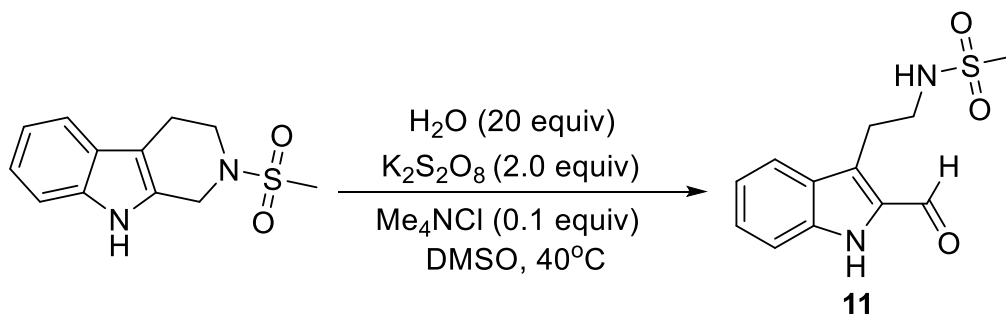

### *N*-(2-(2-formyl-1H-indol-3-yl)ethyl)methanesulfonamide

To a solution of 2-(methanesulfonyl)-2,3,4,9-tetrahydro-1H-pyrido[3,4-b]indole (250 mg, 1 mmol) in DMSO (6 mL) was added K<sub>2</sub>S<sub>2</sub>O<sub>8</sub> (540 mg, 2 mmol). The reaction mixture was stirred at 40 °C. for 1 min, then NMe<sub>4</sub>Cl (11 mg, 0.1 mmol) and H<sub>2</sub>O (360 μL, 20 mmol) was added into the mixture. After stirring for 8 h, the reaction mixture was diluted with EtOAc (20 mL) and extracted with saturated NaHCO<sub>3</sub> (20 mL), The combined organic layers were washed with saturated brine, dried over anhydrous Na<sub>2</sub>SO<sub>4</sub>, filtered, and concentrated under reduced pressure to afford the crude product, which was purified by silica gel chromatography (PE/EtOAc = 2:1) to give the desired product (244 mg, 92%) as a white solid.

**Physical State:** white solid.

**Melting Point:** 151.9 – 152.8 °C.

**TLC:** R<sub>f</sub> = 0.60 (PE/EtOAc = 1:2).

**<sup>1</sup>H NMR (400 MHz, DMSO-*d*<sub>6</sub>)** δ 11.72 (s, 1H), 10.02 (s, 1H), 7.77 (d, *J* = 8.0 Hz, 1H), 7.43 (d, *J* = 8.2 Hz, 1H), 7.33 (t, *J* = 7.4 Hz, 1H), 7.18 – 7.09 (m, 2H), 3.37 (s, 1H), 3.27 (s, 2H), 3.02 (d, *J* = 15.4 Hz, 1H), 2.82 (s, 3H).

**<sup>13</sup>C NMR (101 MHz, DMSO-*d*<sub>6</sub>)** δ 182.36, 138.16, 133.31, 127.33, 127.01, 124.63, 121.57, 120.42, 113.30, 44.39, 42.59, 24.87.

**HRMS (ESI):** calcd for C<sub>12</sub>H<sub>14</sub>N<sub>2</sub>O<sub>3</sub>S [M + H]<sup>+</sup> *m/z* 267.0798, found 267.0797.

## Compound 12

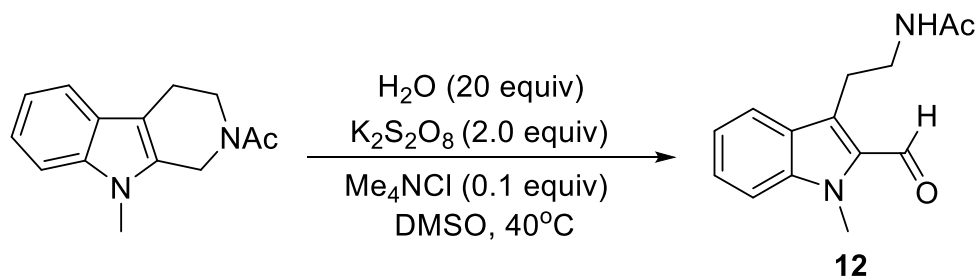

### ***N*-(2-(2-formyl-1-methyl-1H-indol-3-yl)ethyl)acetamide**

To a solution of 1-(9-methyl-1,3,4,9-tetrahydro-2H-pyrido[3,4-b]indol-2-yl)ethan-1-one (66 mg, 0.3 mmol) in DMSO (2 mL) was added  $K_2S_2O_8$  (160 mg, 0.6 mmol). The reaction mixture was stirred at 40 °C. for 1 min, then  $NMe_4Cl$  (3 mg, 0.03 mmol) and  $H_2O$  (108  $\mu$ L, 6 mmol) was added into the mixture. After stirring for 6 h, the reaction mixture was diluted with EtOAc (10 mL) and extracted with saturated  $NaHCO_3$  (10 mL), The combined organic layers were washed with saturated brine, dried over anhydrous  $Na_2SO_4$ , filtered, and concentrated under reduced pressure to afford the crude product, which was purified by silica gel chromatography (PE/EtOAc = 1:1) to give the desired product (36 mg, 52%) as a white solid.

**Physical State:** white solid.

**Melting Point:** 146.4 – 147.5 °C.

**TLC:**  $R_f$  = 0.28 (PE/EtOAc = 1:2).

**$^1H$  NMR (400 MHz,  $CDCl_3$ )**  $\delta$  10.08 (s, 1H), 7.73 (d,  $J$  = 8.0 Hz, 1H), 7.43 (t,  $J$  = 7.5 Hz, 1H), 7.35 (d,  $J$  = 8.4 Hz, 1H), 7.17 (t,  $J$  = 7.4 Hz, 1H), 5.78 (s, 1H), 4.04 (s, 3H), 3.56 – 3.52 (m, 2H), 3.30 (t,  $J$  = 6.2 Hz, 2H), 1.91 (s, 3H).

**$^{13}C$  NMR (101 MHz,  $CDCl_3$ )**  $\delta$  181.62, 170.25, 139.73, 131.72, 127.46, 127.00, 126.31, 121.20, 120.70, 110.40, 41.25, 31.52, 23.75, 23.25.

**HRMS (ESI):** calcd for  $C_{14}H_{16}N_2O_2$   $[M + H]^+$   $m/z$  245.1285, found 245.1277.

**Compound 13**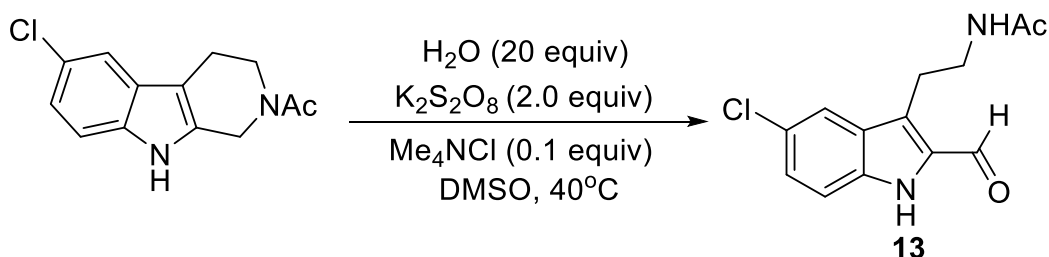***N*-(2-(5-chloro-2-formyl-1H-indol-3-yl)ethyl)acetamide**

To a solution of 1-(6-chloro-1,3,4,9-tetrahydro-2H-pyrido[3,4-b]indol-2-yl)ethan-1-one (214 mg, 1 mmol) in DMSO (6 mL) was added K<sub>2</sub>S<sub>2</sub>O<sub>8</sub> (540 mg, 2 mmol). The reaction mixture was stirred at 40 °C. for 1 min, then NMe<sub>4</sub>Cl (11 mg, 0.1 mmol) and H<sub>2</sub>O (360 μL, 20 mmol) was added into the mixture. After stirring for 5 h, the reaction mixture was diluted with EtOAc (20 mL) and extracted with saturated NaHCO<sub>3</sub> (20 mL), The combined organic layers were washed with saturated brine, dried over anhydrous Na<sub>2</sub>SO<sub>4</sub>, filtered, and concentrated under reduced pressure to afford the crude product, which was purified by silica gel chromatography (CH<sub>2</sub>Cl<sub>2</sub>/MeOH = 10:1) to give the desired product (210 mg, 79%) as a white solid.

**Physical State:** white solid.

**Melting Point:** 116.8 – 117.8 °C.

**TLC:** R<sub>f</sub> = 0.29 (PE/EtOAc = 1:2).

**<sup>1</sup>H NMR (400 MHz, DMSO-*d*<sub>6</sub>)** δ 11.86 (s, 1H), 9.94 (s, 1H), 7.97 (s, 1H), 7.84 (s, 1H), 7.42 (d, *J* = 8.7 Hz, 1H), 7.32 (d, *J* = 8.7 Hz, 1H), 3.31 – 3.28 (m, 2H), 3.19 (t, *J* = 6.7 Hz 2H), 1.73 (s, 3H).

**<sup>13</sup>C NMR (101 MHz, DMSO-*d*<sub>6</sub>)** δ 182.32, 169.83, 136.47, 134.32, 128.47, 127.01, 124.91(2C), 120.72, 114.96, 40.65, 23.65, 22.96.

**HRMS (ESI):** calcd for C<sub>13</sub>H<sub>13</sub>ClN<sub>2</sub>O<sub>2</sub> [M + H]<sup>+</sup> *m/z* 265.0738, found 265.0730.



## Compound 14

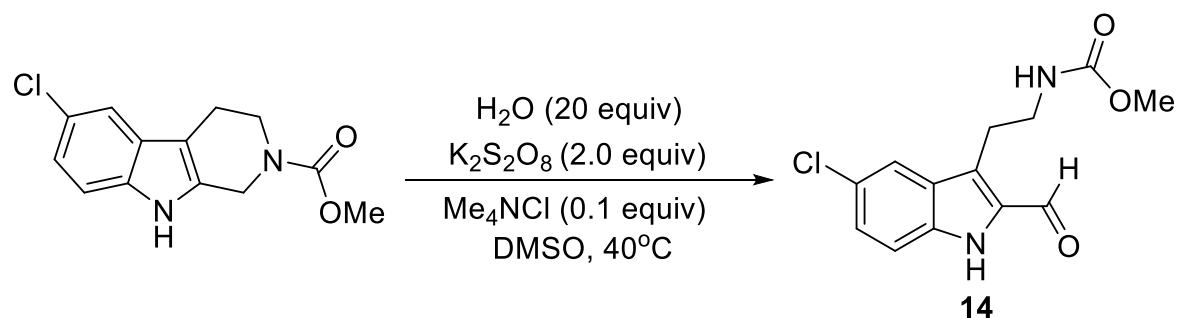

### ***Methyl (2-(5-chloro-2-formyl-1H-indol-3-yl)ethyl)carbamate***

To a solution of *methyl 6-chloro-1,3,4,9-tetrahydro-2H-pyrido[3,4-b]indole-2-carboxylate* (264 mg, 1 mmol) in DMSO (6 mL) was added  $K_2S_2O_8$  (540 mg, 2 mmol). The reaction mixture was stirred at 40 °C. for 1 min, then  $NMe_4Cl$  (11 mg, 0.1 mmol) and  $H_2O$  (360  $\mu$ L, 20 mmol) was added into the mixture. After stirring for 5 h, the reaction mixture was diluted with EtOAc (20 mL) and extracted with saturated  $NaHCO_3$  (20 mL), The combined organic layers were washed with saturated brine, dried over anhydrous  $Na_2SO_4$ , filtered, and concentrated under reduced pressure to afford the crude product, which was purified by silica gel chromatography (PE/EtOAc = 2:1) to give the desired product (229 mg, 82%) as a white solid.

**Physical State:** white solid.

**Melting Point:** 178.9 – 179.5 °C.

**TLC:**  $R_f$  = 0.32 (PE/EtOAc = 2:1).

**$^1H$  NMR (400 MHz, DMSO- $d_6$ )**  $\delta$  11.87 (s, 1H), 9.96 (s, 1H), 7.84 (s, 1H), 7.43 (d,  $J$  = 8.8 Hz, 1H), 7.33 (d,  $J$  = 8.8 Hz, 1H), 7.24 (s, 1H), 3.34 (s, 3H), 3.29 – 3.24 (m, 2H), 3.21 (t,  $J$  = 5.7 Hz, 2H).

**$^{13}C$  NMR (101 MHz, DMSO- $d_6$ )**  $\delta$  182.36, 157.22, 136.46, 134.36, 128.54, 126.98, 124.89, 124.64, 120.68, 114.96, 51.68, 42.30, 23.92.

**HRMS (ESI):** calcd for  $C_{13}H_{14}ClN_2O_3$   $[M + H]^+$   $m/z$  281.0698, found 281.0688.

### Compound 15

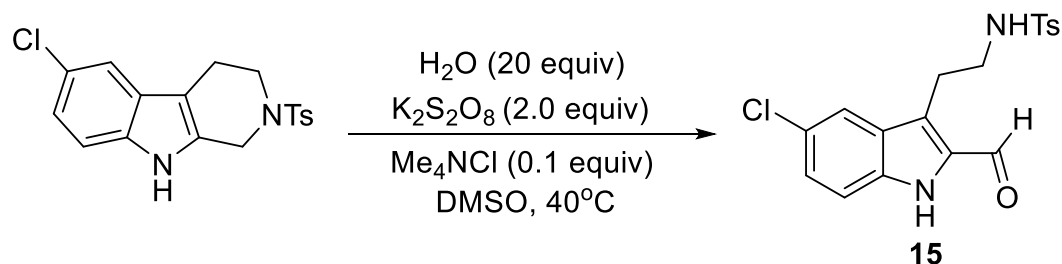

#### ***N*-(2-(5-chloro-2-formyl-1H-indol-3-yl)ethyl)-4-methylbenzenesulfonamide**

To a solution of 6-chloro-2-tosyl-2,3,4,9-tetrahydro-1H-pyrido[3,4-b]indole (361 mg, 1 mmol) in DMSO (6 mL) was added  $K_2S_2O_8$  (540 mg, 2 mmol). The reaction mixture was stirred at 40 °C. for 1 min, then  $NMe_4Cl$  (11 mg, 0.1 mmol) and  $H_2O$  (360  $\mu$ L, 20 mmol) was added into the mixture. After stirring for 5 h, the reaction mixture was diluted with EtOAc (20 mL) and extracted with saturated  $NaHCO_3$  (20 mL), The combined organic layers were washed with saturated brine, dried over anhydrous  $Na_2SO_4$ , filtered, and concentrated under reduced pressure to afford the crude product, which was purified by silica gel chromatography (PE/EtOAc = 2:1) to give the desired product (250 mg, 67%) as a white solid.

**Physical State:** white solid.

**Melting Point:** 118.7 – 119.5 °C.

**TLC:**  $R_f$  = 0.38 (PE/EtOAc = 2:1).

**$^1H$  NMR (400 MHz, DMSO- $d_6$ )**  $\delta$  11.85 (s, 1H), 9.94 (s, 1H), 7.71 (s, 1H), 7.64 (t,  $J$  = 5.5 Hz, 1H), 7.59 (s, 1H), 7.57 (s, 1H), 7.40 (d,  $J$  = 8.9 Hz, 1H), 7.32 – 7.29 (m, 3H), 3.16 (m, 2H), 3.01 (t,  $J$  = 6.1 Hz, 2H), 2.36 (s, 3H).

**$^{13}C$  NMR (101 MHz, DMSO- $d_6$ )**  $\delta$  182.66, 143.00, 137.88, 136.39, 134.41, 129.97 (2C), 128.25, 126.91, 126.84 (2C), 124.91, 123.66, 120.57, 114.98, 44.18, 24.08, 21.43.

**HRMS (ESI):** calcd for  $C_{18}H_{17}ClN_2O_3S$   $[M + H]^+$   $m/z$  377.0721, found 377.0711.

## Compound 16

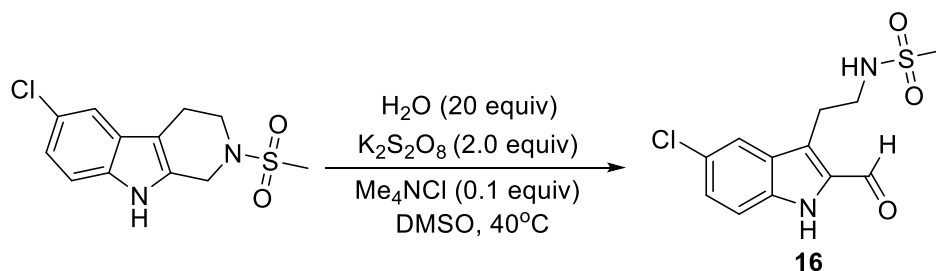

### *N*-(2-(2-formyl-1H-indol-3-yl)ethyl)methanesulfonamide

To a solution of 6-chloro-2-(methanesulfonyl)-2,3,4,9-tetrahydro-1H-pyrido[3,4-b]indole (143 mg, 0.5 mmol) in DMSO (3 mL) was added  $K_2S_2O_8$  (270 mg, 1 mmol). The reaction mixture was stirred at 40 °C. for 1 min, then  $NMe_4Cl$  (6 mg, 0.05 mmol) and  $H_2O$  (180  $\mu$ L, 10 mmol) was added into the mixture. After stirring for 5 h, the reaction mixture was diluted with EtOAc (20 mL) and extracted with saturated  $NaHCO_3$  (20 mL), The combined organic layers were washed with saturated brine, dried over anhydrous  $Na_2SO_4$ , filtered, and concentrated under reduced pressure to afford the crude product, which was purified by silica gel chromatography (PE/EtOAc = 2:1) to give the desired product (129 mg, 86%) as a white solid.

**Physical State:** white solid.

**Melting Point:** 162.9 – 163.5 °C.

**TLC:**  $R_f$  = 0.48 (PE/EtOAc = 1:2).

**$^1H$  NMR (400 MHz, DMSO- $d_6$ )**  $\delta$  11.92 (s, 1H), 10.02 (s, 1H), 7.86 (s, 1H), 7.45 (d,  $J$  = 8.7 Hz, 1H), 7.33 (d,  $J$  = 8.7 Hz, 1H), 7.14 (s, 1H), 3.25 (s, 4H), 2.83 (s, 3H).

**$^{13}C$  NMR (101 MHz, DMSO- $d_6$ )**  $\delta$  182.75, 136.41, 134.42, 128.35, 127.04, 125.00, 123.99, 120.73, 115.02, 44.25, 39.77, 24.58.

**HRMS (ESI):** calcd for  $C_{12}H_{13}ClN_2O_3S$  [ $M + H$ ] $^+$   $m/z$  301.0408, found 301.0435.

**Compound 17**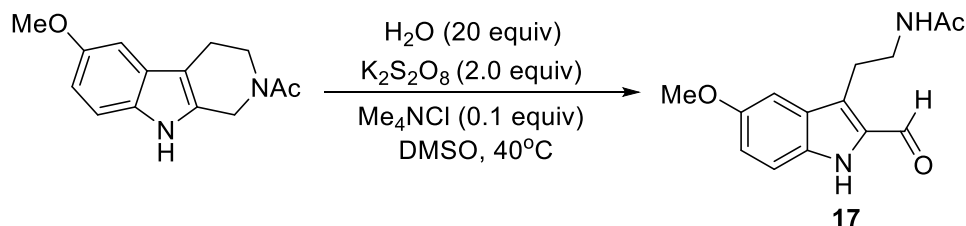***N*-(2-(2-formyl-5-methoxy-1*H*-indol-3-yl)ethyl)acetamide**

To a solution of 1-(6-methoxy-1,3,4,9-tetrahydro-2*H*-pyrido[3,4-*b*]indol-2-yl)ethan-1-one (122 mg, 0.5 mmol) in DMSO (4 mL) was added K<sub>2</sub>S<sub>2</sub>O<sub>8</sub> (270 mg, 1 mmol). The reaction mixture was stirred at 40 °C. for 1 min, then NMe<sub>4</sub>Cl (6 mg, 0.05 mmol) and H<sub>2</sub>O (180 μL, 10 mmol) was added into the mixture. After stirring for 8 h, the reaction mixture was diluted with EtOAc (20 mL) and extracted with saturated NaHCO<sub>3</sub> (20 mL), The combined organic layers were washed with saturated brine, dried over anhydrous Na<sub>2</sub>SO<sub>4</sub>, filtered, and concentrated under reduced pressure to afford the crude product, which was purified by silica gel chromatography (PE/EtOAc = 1:4) to give the desired product (92 mg, 71%) as a white solid.

**Physical State:** white solid.

**Melting Point:** 181.9 – 182.8 °C.

**TLC:** R<sub>f</sub> = 0.34 (PE/EtOAc = 1:2).

**<sup>1</sup>H NMR (400 MHz, DMSO-*d*<sub>6</sub>)** δ 11.55 (s, 1H), 9.89 (s, 1H), 7.99 (s, 1H), 7.32 (d, *J* = 8.8 Hz, 1H), 7.21 (s, 1H), 7.00 (d, *J* = 9.1 Hz, 1H), 3.80 (s, 3H), 3.33 – 3.30 (m, 2H), 3.17 (t, *J* = 6.7 Hz, 2H), 1.76 (s, 3H).

**<sup>13</sup>C NMR (101 MHz, DMSO)** δ 181.71, 169.73, 154.22, 133.69, 133.65, 127.71, 124.98, 118.87, 114.26, 101.24, 55.79, 40.69, 23.86, 23.04.

**HRMS (ESI):** calcd for C<sub>14</sub>H<sub>16</sub>N<sub>2</sub>O<sub>3</sub> [M + H]<sup>+</sup> *m/z* 261.1234, found 261.1226.

## Compound 18

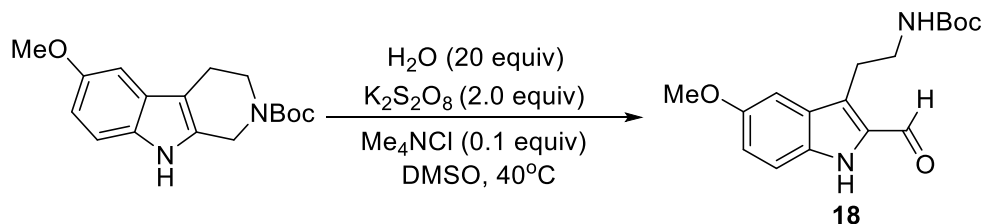

### *N*-(2-(2-formyl-5-methoxy-1H-indol-3-yl)ethyl)acetamide

To a solution of *tert*-butyl 6-methoxy-1,3,4,9-tetrahydro-2H-pyrido[3,4-*b*]indole-2-carboxylate (151 mg, 0.5 mmol) in DMSO (6 mL) was added K<sub>2</sub>S<sub>2</sub>O<sub>8</sub> (270 mg, 1 mmol). The reaction mixture was stirred at 40 °C. for 1 min, then NMe<sub>4</sub>Cl (6 mg, 0.05 mmol) and H<sub>2</sub>O (180 μL, 10 mmol) was added into the mixture. After stirring for 6 h, the reaction mixture was diluted with EtOAc (20 mL) and extracted with saturated NaHCO<sub>3</sub> (20 mL), The combined organic layers were washed with saturated brine, dried over anhydrous Na<sub>2</sub>SO<sub>4</sub>, filtered, and concentrated under reduced pressure to afford the crude product, which was purified by silica gel chromatography (PE/EtOAc = 2:1) to give the desired product (87 mg, 55%) as a brown oil.

**Physical State:** brown oil.

**TLC:** R<sub>f</sub> = 0.23 (PE/EtOAc = 2:1).

**<sup>1</sup>H NMR (400 MHz, CDCl<sub>3</sub>)** δ 9.14 (s, 1H), 8.46 (s, 1H), 6.97 (s, 1H), 6.88 – 6.72 (m, 2H), 3.89 (d, *J* = 6.9 Hz, 1H), 3.82 (s, 3H), 3.76 – 3.72 (m, 1H), 3.47 (s, 1H), 2.20 (d, *J* = 11.3 Hz, 2H), 1.56 (s, 9H).

**<sup>13</sup>C NMR (101 MHz, CDCl<sub>3</sub>)** δ 179.57, 162.94, 155.77, 152.26, 135.01, 130.13, 112.71, 111.39, 110.21, 84.23, 55.81, 44.45, 37.74, 28.79, 28.02 (3C).

**HRMS (ESI):** calcd for C<sub>17</sub>H<sub>22</sub>N<sub>2</sub>O<sub>4</sub> [M + H]<sup>+</sup> *m/z* 318.1580, found 318.1622.

## Compound 19

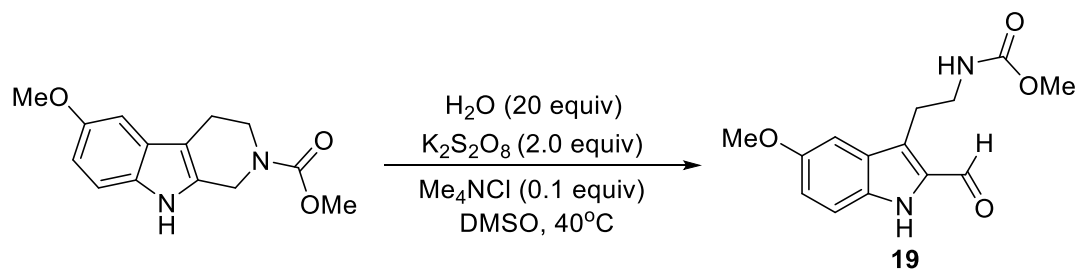

### **Methyl (2-(2-formyl-5-methoxy-1H-indol-3-yl)ethyl)carbamate**

To a solution of methyl 6-methoxy-1,3,4,9-tetrahydro-2H-pyrido[3,4-b]indole-2-carboxylate (130 mg, 0.5 mmol) in DMSO (6 mL) was added K<sub>2</sub>S<sub>2</sub>O<sub>8</sub> (270 mg, 1 mmol). The reaction mixture was stirred at 40 °C. for 1 min, then NMe<sub>4</sub>Cl (6 mg, 0.05 mmol) and H<sub>2</sub>O (180 μL, 10 mmol) was added into the mixture. After stirring for 10 h, the reaction mixture was diluted with EtOAc (20 mL) and extracted with saturated NaHCO<sub>3</sub> (20 mL), The combined organic layers were washed with saturated brine, dried over anhydrous Na<sub>2</sub>SO<sub>4</sub>, filtered, and concentrated under reduced pressure to afford the crude product, which was purified by silica gel chromatography (PE/EtOAc = 2:1) to give the desired product (88 mg, 65%) as a white solid.

**Physical State:** white solid.

**Melting Point:** 168.2 – 169.1 °C.

**TLC:** R<sub>f</sub> = 0.22 (PE/EtOAc = 2:1).

**<sup>1</sup>H NMR (400 MHz, CDCl<sub>3</sub>)** δ 9.93 (s, 1H), 9.22 (s, 1H), 7.35 (d, *J* = 9.1 Hz, 1H), 7.10 (d, *J* = 6.7 Hz, 2H), 4.94 (s, 1H), 3.89 (s, 3H), 3.70 (s, 3H), 3.55 - 3.58 (m, 2H), 3.30 (t, *J* = 6.0 Hz, 2H).

**<sup>13</sup>C NMR (101 MHz, DMSO)** δ 181.72, 157.23, 154.22, 133.68, 133.66, 127.72, 124.74, 118.84, 114.25, 101.23, 55.76, 51.69, 42.32, 24.14.

**HRMS (ESI):** calcd for C<sub>14</sub>H<sub>16</sub>N<sub>2</sub>O<sub>4</sub> [M + H]<sup>+</sup> *m/z* 277.1183, found 277.1176.

## Compound 20

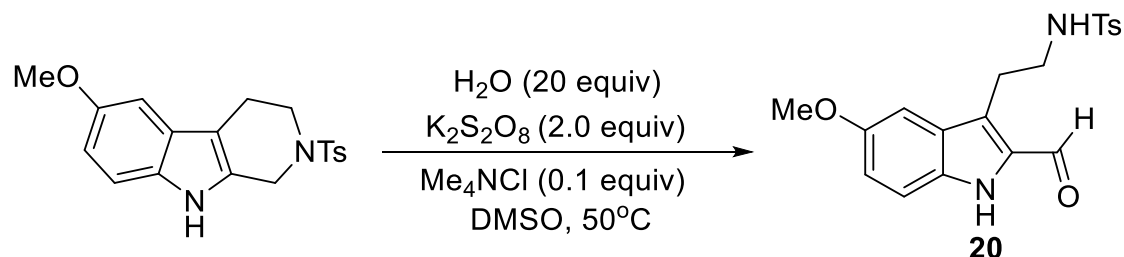

### ***N*-(2-(2-formyl-5-methoxy-1H-indol-3-yl)ethyl)-4-methylbenzenesulfonamide**

To a solution of 6-methoxy-2-tosyl-2,3,4,9-tetrahydro-1H-pyrido[3,4-b]indole (180 mg, 0.5 mmol) in DMSO (5 mL) was added K<sub>2</sub>S<sub>2</sub>O<sub>8</sub> (270 mg, 1 mmol). The reaction mixture was stirred at 50 °C. for 1 min, then NMe<sub>4</sub>Cl (6 mg, 0.05 mmol) and H<sub>2</sub>O (180 μL, 10 mmol) was added into the mixture. After stirring for 100 h, the reaction mixture was diluted with EtOAc (10 mL) and extracted with saturated NaHCO<sub>3</sub> (10 mL), The combined organic layers were washed with saturated brine, dried over anhydrous Na<sub>2</sub>SO<sub>4</sub>, filtered, and concentrated under reduced pressure to afford the crude product, which was purified by silica gel chromatography (PE/EtOAc = 2:1) to give the desired product (131 mg, 70%) as a white solid.

**Physical State:** white solid.

**Melting Point:** 130.4 – 131.5 °C.

**TLC:** R<sub>f</sub> = 0.65 (PE/EtOAc = 2:1).

**<sup>1</sup>H NMR (400 MHz, DMSO-*d*<sub>6</sub>)** <sup>1</sup>H NMR (400 MHz, DMSO-*d*<sub>6</sub>) δ 11.56 (s, 1H), 9.90 (s, 1H), 7.71 – 7.68 (m, 1H), 7.63 (d, *J* = 7.6 Hz, 2H), 7.34 (d, *J* = 7.6 Hz, 2H), 7.08 (s, 1H), 6.98 (d, *J* = 8.8 Hz, 1H), 3.78 (s, 3H), 3.17 (t, *J* = 6.3 Hz, 2H), 3.00 – 3.05 (m, *J* = 6.0 Hz, 2H), 2.37 (s, 3H).

**<sup>13</sup>C NMR (101 MHz, DMSO-*d*<sub>6</sub>)** δ 181.97, 154.24, 143.00, 137.98, 133.65, 133.62, 129.99, 127.49, 126.89, 123.69, 118.77, 114.29, 101.14, 55.78, 44.18, 24.39, 21.41.

**HRMS (ESI):** calcd for C<sub>19</sub>H<sub>20</sub>N<sub>2</sub>O<sub>4</sub>S [M + H]<sup>+</sup> *m/z* 373.1217, found 373.1203.

## Compound 21

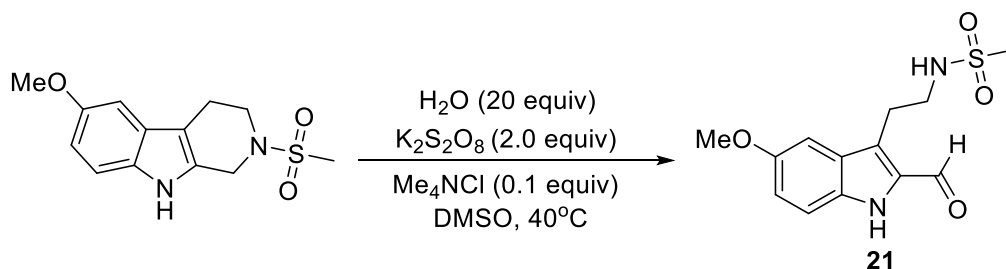

### ***N*-(2-(2-formyl-5-methoxy-1H-indol-3-yl)ethyl)methanesulfonamide**

To a solution of 6-methoxy-2-(methylsulfonyl)-2,3,4,9-tetrahydro-1H-pyrido[3,4-*b*]indole (140 mg, 0.5 mmol) in DMSO (4 mL) was added K<sub>2</sub>S<sub>2</sub>O<sub>8</sub> (270 mg, 1 mmol). The reaction mixture was stirred at 40 °C. for 1 min, then NMe<sub>4</sub>Cl (6 mg, 0.05 mmol) and H<sub>2</sub>O (180 μL, 10 mmol) was added into the mixture. After stirring for 10 h, the reaction mixture was diluted with EtOAc (20 mL) and extracted with saturated NaHCO<sub>3</sub> (20 mL), The combined organic layers were washed with saturated brine, dried over anhydrous Na<sub>2</sub>SO<sub>4</sub>, filtered, and concentrated under reduced pressure to afford the crude product, which was purified by silica gel chromatography (PE/EtOAc = 1:1) to give the desired product (110 mg, 75%) as a white solid.

**Physical State:** white solid.

**Melting Point:** 162.5 – 163.4 °C.

**TLC:** R<sub>f</sub> = 0.26 (PE/EtOAc = 1:1).

**<sup>1</sup>H NMR (400 MHz, DMSO-*d*<sub>6</sub>)** δ 11.60 (s, 1H), 9.97 (s, 1H), 7.33 (d, *J* = 8.8 Hz, 1H), 7.21 (s, 1H), 7.15 (s, 1H), 7.01 (d, *J* = 8.9 Hz, 1H), 3.81 (s, 3H), 3.25 (s, 4H), 2.83 (s, 3H).

**<sup>13</sup>C NMR (101 MHz, DMSO)** δ 182.11, 154.26, 133.71, 133.64, 127.62, 124.04, 118.83, 114.30, 101.34, 55.80, 44.26, 39.79, 24.87.

**HRMS (ESI):** calcd for C<sub>13</sub>H<sub>16</sub>N<sub>2</sub>O<sub>4</sub>S [M + H]<sup>+</sup> *m/z* 297.0904, found 297.0946.



## Compound 22

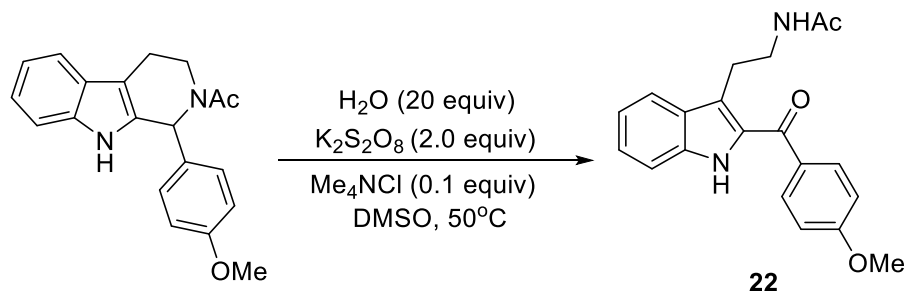

### ***N*-(2-(2-(4-methoxybenzoyl)-1*H*-indol-3-yl)ethyl)acetamide**

To a solution of 1-(1-(4-methoxyphenyl)-1,3,4,9-tetrahydro-2*H*-pyrido[3,4-*b*]indol-2-yl)ethan-1-one (162 mg, 0.5 mmol) in DMSO (6 mL) was added K<sub>2</sub>S<sub>2</sub>O<sub>8</sub> (270 mg, 1 mmol). The reaction mixture was stirred at 50 °C. for 1 min, then NMe<sub>4</sub>Cl (6 mg, 0.05 mmol) and H<sub>2</sub>O (180 μL, 10 mmol) was added into the mixture. After stirring for 10 h, the reaction mixture was diluted with EtOAc (20 mL) and extracted with saturated NaHCO<sub>3</sub> (20 mL), The combined organic layers were washed with saturated brine, dried over anhydrous Na<sub>2</sub>SO<sub>4</sub>, filtered, and concentrated under reduced pressure to afford the crude product, which was purified by silica gel chromatography (PE/EtOAc = 1:1) to give the desired product (118 mg, 70%) as a white solid.

**Physical State:** white solid.

**Melting Point:** 170.4 – 171.5 °C.

**TLC:** R<sub>f</sub> = 0.32 (PE/EtOAc = 1:2).

**<sup>1</sup>H NMR (400 MHz, CDCl<sub>3</sub>)** δ 9.05 (s, 1H), 7.86 (d, *J* = 7.4 Hz, 2H), 7.74 (d, *J* = 8.0 Hz, 1H), 7.43 (d, *J* = 8.3 Hz, 1H), 7.38 (d, *J* = 7.1 Hz, 1H), 7.21 (d, *J* = 7.3 Hz, 1H), 7.00 (d, *J* = 7.6 Hz, 3H), 3.90 (d, *J* = 1.7 Hz, 3H), 3.54 - 3.56 (m, 2H), 3.21 (t, *J* = 5.9 Hz, 2H), 1.86 (s, 3H).

**<sup>13</sup>C NMR (101 MHz, CDCl<sub>3</sub>)** δ 188.06, 170.51, 163.51, 136.49, 132.14, 131.94 (2C), 130.87, 127.76, 126.12, 121.91, 120.77, 120.74, 114.03 (2C), 112.24, 55.57, 41.08, 23.98, 23.11.

**HRMS (ESI):** calcd for C<sub>20</sub>H<sub>20</sub>N<sub>2</sub>O<sub>3</sub> [M + H]<sup>+</sup> *m/z* 336.1474, found 336.1496.

### Compound 23

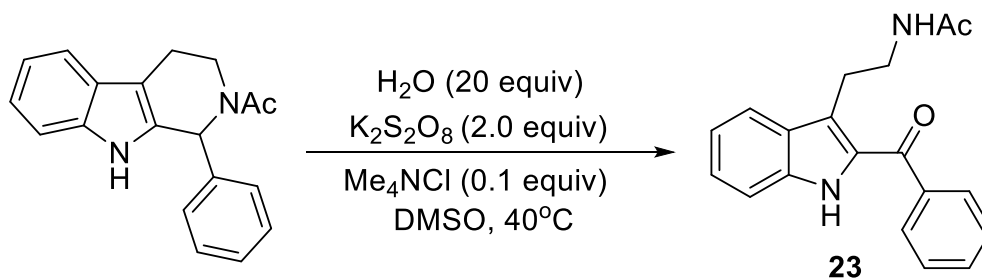

#### ***N*-(2-(2-benzoyl-1H-indol-3-yl)ethyl)acetamide**

To a solution of 1-(1-phenyl-1,3,4,9-tetrahydro-2H-pyrido[3,4-b]indol-2-yl)ethan-1-one (116 mg, 0.4 mmol) in DMSO (6 mL) was added K<sub>2</sub>S<sub>2</sub>O<sub>8</sub> (216 mg, 0.8 mmol). The reaction mixture was stirred at 40 °C. for 1 min, then NMe<sub>4</sub>Cl (5 mg, 0.04 mmol) and H<sub>2</sub>O (144 μL, 8 mmol) was added into the mixture. After stirring for 48 h, the reaction mixture was diluted with EtOAc (20 mL) and extracted with saturated NaHCO<sub>3</sub> (20 mL), The combined organic layers were washed with saturated brine, dried over anhydrous Na<sub>2</sub>SO<sub>4</sub>, filtered, and concentrated under reduced pressure to afford the crude product, which was purified by silica gel chromatography (PE/EtOAc = 1:1) to give the desired product (91 mg, 75%) as a white solid.

**Physical State:** white solid.

**Melting Point:** 102.6 – 103.5 °C.

**TLC:** R<sub>f</sub> = 0.33 (PE/EtOAc = 1:1).

**<sup>1</sup>H NMR (400 MHz, CDCl<sub>3</sub>)** δ 8.69 (s, 1H), 7.86 (s, 2H), 7.79 (d, *J* = 7.9 Hz, 1H), 7.66 (t, *J* = 7.1 Hz, 1H), 7.57 (t, *J* = 7.1 Hz, 2H), 7.42 (s, 2H), 7.25 – 7.20 (m, 1H), 6.55 (s, 1H), 3.57 - 3.59 (m, 2H), 3.23 (t, *J* = 5.2 Hz, 2H), 1.90 (d, *J* = 2.4 Hz, 3H).

**<sup>13</sup>C NMR (101 MHz, DMSO-*d*<sub>6</sub>)** δ 189.01, 169.46, 139.38, 137.21, 132.72, 131.90, 129.39 (2C), 129.06 (2C), 128.04, 125.73, 121.47, 121.16, 120.25, 113.25, 30.32, 25.47, 23.05.

**HRMS (ESI):** calcd for C<sub>19</sub>H<sub>18</sub>N<sub>2</sub>O<sub>2</sub> [M + H]<sup>+</sup> *m/z* 307.1441, found 307.1456.

**Compound 24**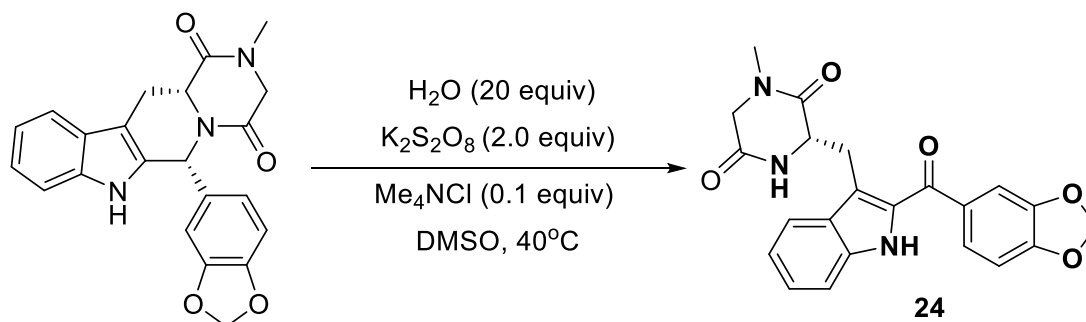**3-((2-(Benzo[d][1,3]dioxole-5-carbonyl)-1H-indol-3-yl)methyl)-1-methylpiperazine-2,5-dione**

To a solution of 6-(benzo[d][1,3]dioxol-5-yl)-2-methyl-2,3,6,7,12,12a-hexahydropyrazino[1',2':1,6]pyrido[3,4-b]indole-1,4-dione (117 mg, 0.3 mmol) in DMSO (4 mL) was added  $\text{K}_2\text{S}_2\text{O}_8$  (160 mg, 0.6 mmol). The reaction mixture was stirred at 40 °C. for 1 min, then  $\text{Me}_4\text{NCl}$  (4 mg, 0.03 mmol) and  $\text{H}_2\text{O}$  (108  $\mu\text{L}$ , 6 mmol) was added into the mixture. After stirring for 18 h, the reaction mixture was diluted with EtOAc (20 mL) and extracted with saturated  $\text{NaHCO}_3$  (20 mL), The combined organic layers were washed with saturated brine, dried over anhydrous  $\text{Na}_2\text{SO}_4$ , filtered, and concentrated under reduced pressure to afford the crude product, which was purified by silica gel chromatography ( $\text{CH}_2\text{Cl}_2/\text{MeOH}$  = 20:1) to give the desired product (96 mg, 79%) as a white solid.

**Physical State:** white solid.

**Melting Point:** 187.6 – 188.5 °C.

**TLC:**  $R_f$  = 0.20 (PE/EtOAc = 1:2).

**$^1\text{H}$  NMR (400 MHz,  $\text{CDCl}_3$ )**  $\delta$  9.11 (s, 1H), 7.71 (d,  $J$  = 8.1 Hz, 1H), 7.45 (d,  $J$  = 8.2 Hz, 1H), 7.38 (t,  $J$  = 7.3 Hz, 1H), 7.28 (s, 1H), 7.22 – 7.16 (m, 2H), 6.82 (d,  $J$  = 7.8 Hz, 1H), 6.72 (s, 1H), 6.05 (s, 2H), 4.35 (s, 1H), 3.78 – 3.71 (m, 1H), 3.62 (d,  $J$  = 16.5 Hz, 1H), 3.50 (d,  $J$  = 17.4 Hz, 1H), 2.92 (d,  $J$  = 17.5 Hz, 1H), 2.73 (s, 3H).

**$^{13}\text{C}$  NMR (101 MHz,  $\text{CDCl}_3$ )**  $\delta$  186.84, 166.24, 165.37, 151.57, 148.16, 136.30, 132.68, 132.58, 127.42, 126.46, 125.63, 121.29, 121.12, 118.22, 112.35, 109.39, 108.13, 101.96, 56.17, 51.02, 33.81, 28.89.

**HRMS (ESI):** calcd for  $\text{C}_{22}\text{H}_{19}\text{N}_3\text{O}_5$  [ $\text{M} + \text{H}$ ] $^+$   $m/z$  406.1397, found 406.1386.

## Compound 25

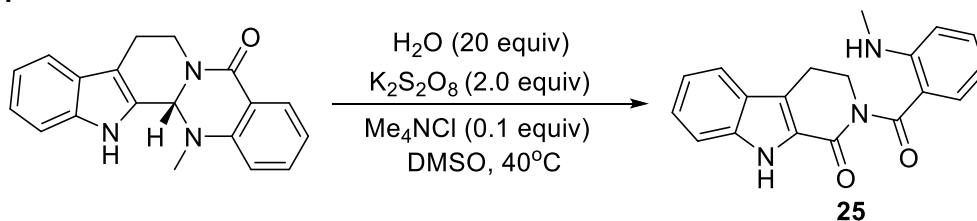

### **2-(2-(Methylamino)benzoyl)-2,3,4,9-tetrahydro-1H-pyrido[3,4-b]indol-1-one**

To a solution of evodiamine (303 mg, 1 mmol) in DMSO (3 mL) was added  $\text{K}_2\text{S}_2\text{O}_8$  (540 mg, 2 mmol). The reaction mixture was stirred at  $40^\circ\text{C}$  for 1 min, then  $\text{NMe}_4\text{Cl}$  (11 mg, 0.1 mmol) and  $\text{H}_2\text{O}$  (360  $\mu\text{L}$ , 20 mmol) was added into the mixture. After stirring for 10 h, After cooling, the mixtures poured into  $\text{H}_2\text{O}$  and the precipitate was collected by filtration to give the desired product as a white solid (277 mg, 87%).

Procedure for gram-scale of 25

To a solution of evodiamine (1.21 g, 4 mmol) in DMSO (25 mL) was added  $\text{K}_2\text{S}_2\text{O}_8$  (2.16 g, 8 mmol). The reaction mixture was stirred at  $40^\circ\text{C}$  for 1 min, then  $\text{NMe}_4\text{Cl}$  (44 mg, 0.4 mmol) and  $\text{H}_2\text{O}$  (1.4 mL, 80 mmol) was added into the mixture. After stirring for 15 h, After cooling, the mixtures poured into  $\text{H}_2\text{O}$  and the precipitate was collected by filtration to give the desired product as a white solid (1.06 g, 83%).

**Physical State:** white solid.

**Melting Point:**  $119.7 - 120.6^\circ\text{C}$ .

**TLC:**  $R_f = 0.23$  (PE/EtOAc = 1:1).

**$^1\text{H}$  NMR (400 MHz, DMSO- $d_6$ )**  $\delta$  11.75 (s, 1H), 7.70 (d,  $J = 8.1$  Hz, 1H), 7.43 (d,  $J = 8.4$  Hz, 1H), 7.31 (t,  $J = 7.4$  Hz, 3H), 7.12 (t,  $J = 7.5$  Hz, 1H), 6.90 (d,  $J = 4.9$  Hz, 1H), 6.70 (d,  $J = 8.3$  Hz, 1H), 6.49 (t,  $J = 7.4$  Hz, 1H), 4.11 (t,  $J = 6.0$  Hz, 2H), 3.18 (t,  $J = 6.0$  Hz, 2H), 2.82 (d,  $J = 4.6$  Hz, 3H).

**$^{13}\text{C}$  NMR (101 MHz, DMSO- $d_6$ )**  $\delta$  175.25, 161.56, 150.24, 138.89, 134.03, 131.94, 126.47, 126.16, 124.92, 123.03, 121.35, 120.54, 117.36, 114.70, 113.28, 111.37, 47.38, 29.99, 21.00.

**HRMS (ESI):** calcd for  $\text{C}_{19}\text{H}_{17}\text{N}_3\text{O}_2$   $[\text{M} + \text{H}]^+$   $m/z$  320.1394, found 320.1384.

## Compound 26

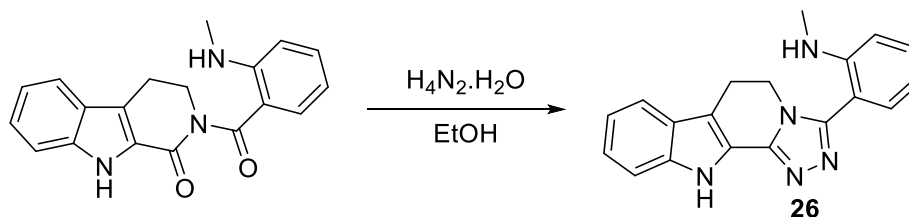

### **2-(6,11-dihydro-5H-[1,2,4]triazolo[4',3':1,2]pyrido[3,4-b]indol-3-yl)-N-methylaniline**

To a solution of 2-(2-(methylamino)benzoyl)-2,3,4,9-tetrahydro-1H-pyrido[3,4-b]indol-1-one (319 mg, 1 mmol) in EtOH (3 mL) was added  $\text{H}_4\text{N}_2 \cdot \text{H}_2\text{O}$  (0.6 mL, 2 mmol). The reaction mixture was stirred at 70 °C for 2 h, the reaction mixture was diluted with EtOAc (20 mL) and extracted with saturated  $\text{NaHCO}_3$  (20 mL). The combined organic layers were washed with saturated brine, dried over anhydrous  $\text{Na}_2\text{SO}_4$ , filtered, and concentrated under reduced pressure to afford the crude product, which was purified by silica gel chromatography (PE/EtOAc = 1:1) to give the desired product (277 mg, 88%) as a yellow solid.

**Physical State:** yellow solid.

**Melting Point:** 110.5 – 111.6 °C.

**TLC:**  $R_f$  = 0.25 (PE/EtOAc = 1:1).

**$^1\text{H}$  NMR (400 MHz,  $\text{CDCl}_3$ )**  $\delta$  10.95 (s, 1H), 7.60 (d,  $J$  = 8.0 Hz, 1H), 7.51 (d,  $J$  = 8.3 Hz, 1H), 7.42 (d,  $J$  = 7.7 Hz, 1H), 7.33 (m,  $J$  = 13.3, 7.2 Hz, 2H), 7.15 (t,  $J$  = 7.4 Hz, 1H), 7.02 (s, 1H), 6.68 (d,  $J$  = 8.4 Hz, 1H), 6.58 (t,  $J$  = 7.5 Hz, 1H), 3.68 (t,  $J$  = 6.9 Hz, 2H), 3.05 (t,  $J$  = 6.9 Hz, 2H), 2.87 (s, 3H).

**$^{13}\text{C}$  NMR (101 MHz,  $\text{CDCl}_3$ )**  $\delta$  170.93, 163.94, 150.48, 137.71, 133.18, 127.37, 126.35, 125.20, 125.07, 120.25, 120.11, 119.96, 114.65, 113.27, 112.73, 111.07, 42.06, 29.69, 20.81.

**HRMS (ESI):** calcd for  $\text{C}_{19}\text{H}_{17}\text{N}_5$   $[\text{M} + \text{H}]^+$   $m/z$  316.1557, found 316.1555.

## 7. Preparation of Substrates

Substrates were prepared according to the published procedures.<sup>1-6</sup>

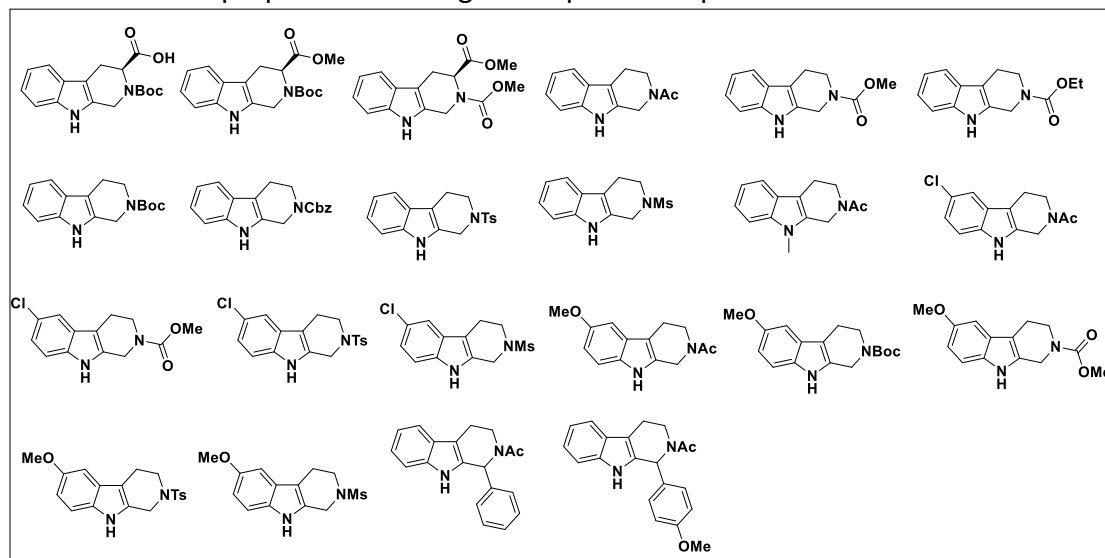

## 8. NMR Spectrum

### <sup>1</sup>H NMR Spectrum of 2

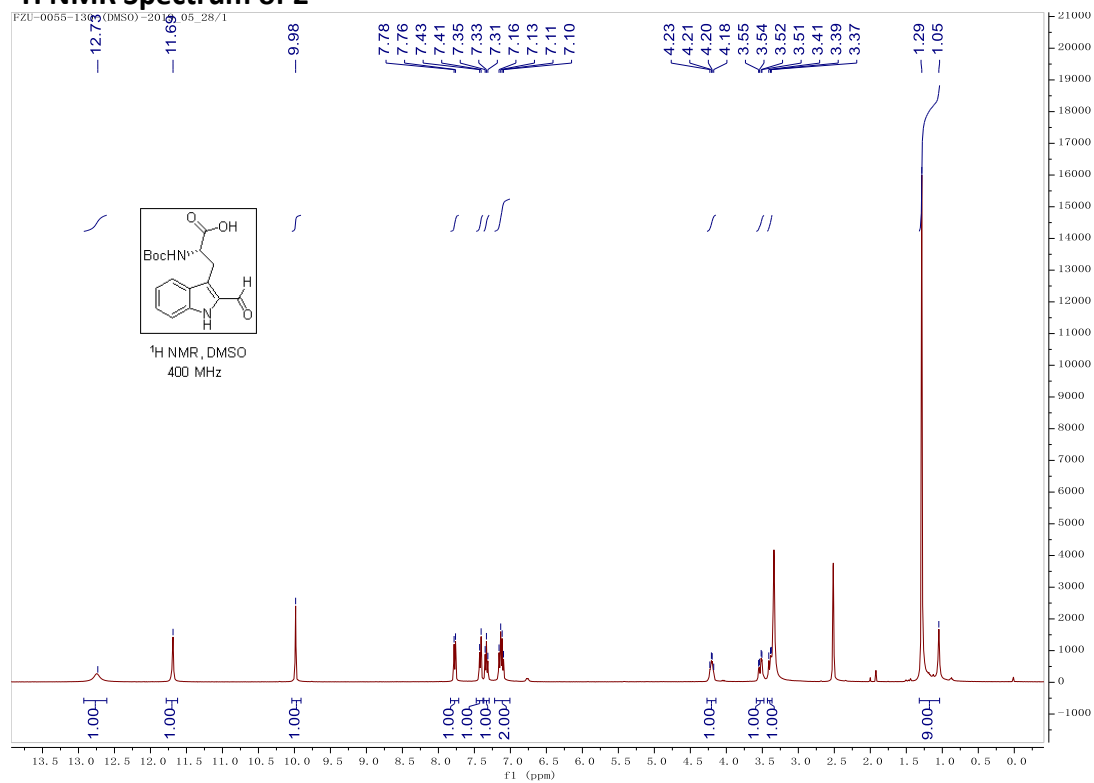

### <sup>13</sup>C NMR Spectrum of 2

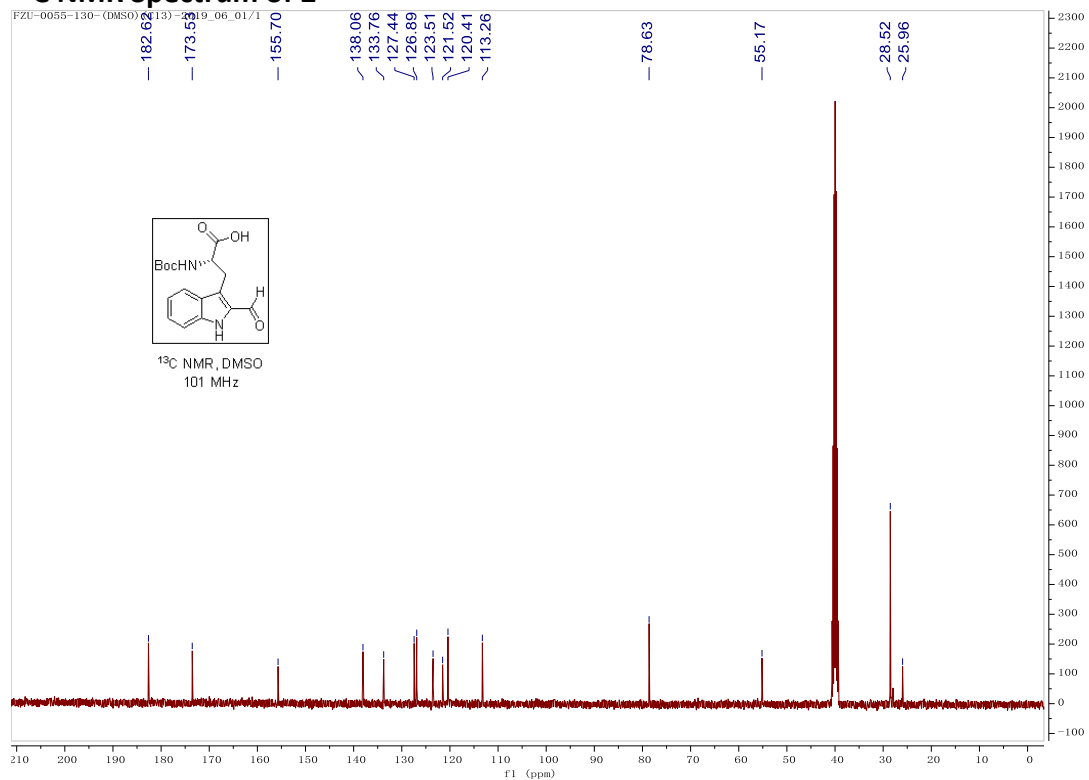

# <sup>1</sup>H NMR Spectrum of 3

FZU-0055-20-1-2019\_07\_29/1

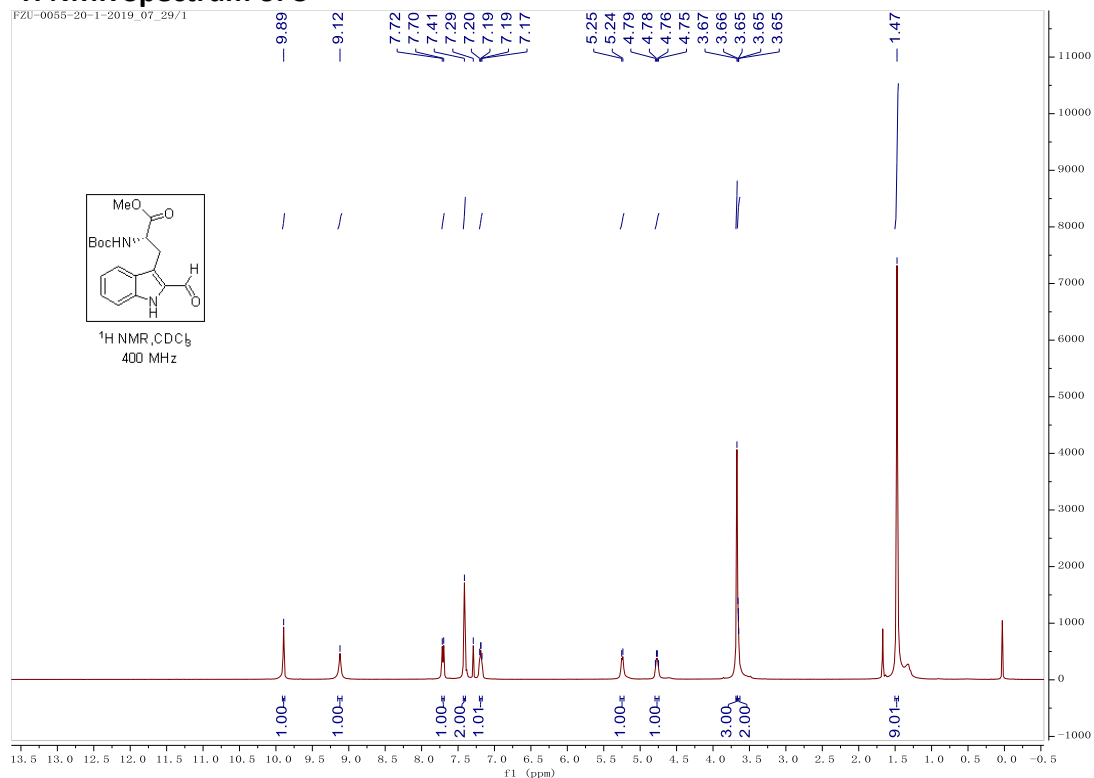

# <sup>13</sup>C NMR Spectrum of 3

FZU-0033-042-020-1 (CN3)-2019\_03\_15/2

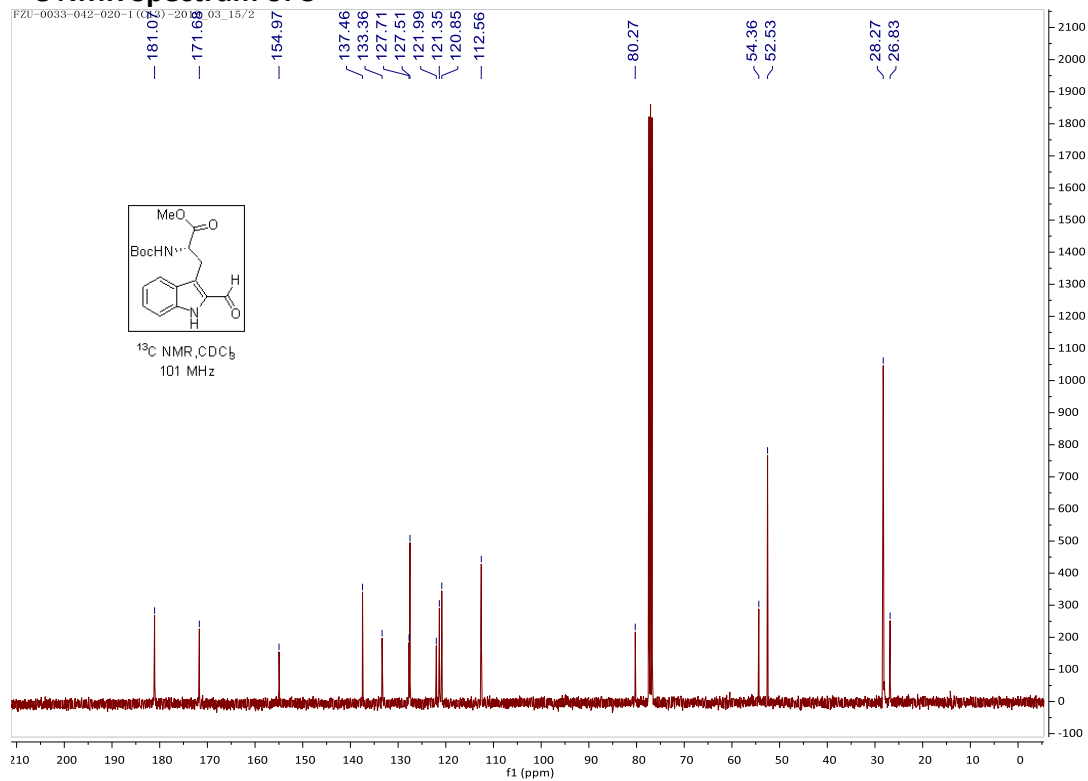



# <sup>1</sup>H NMR Spectrum of 4

FZU-0055-160-2019\_06\_27/1

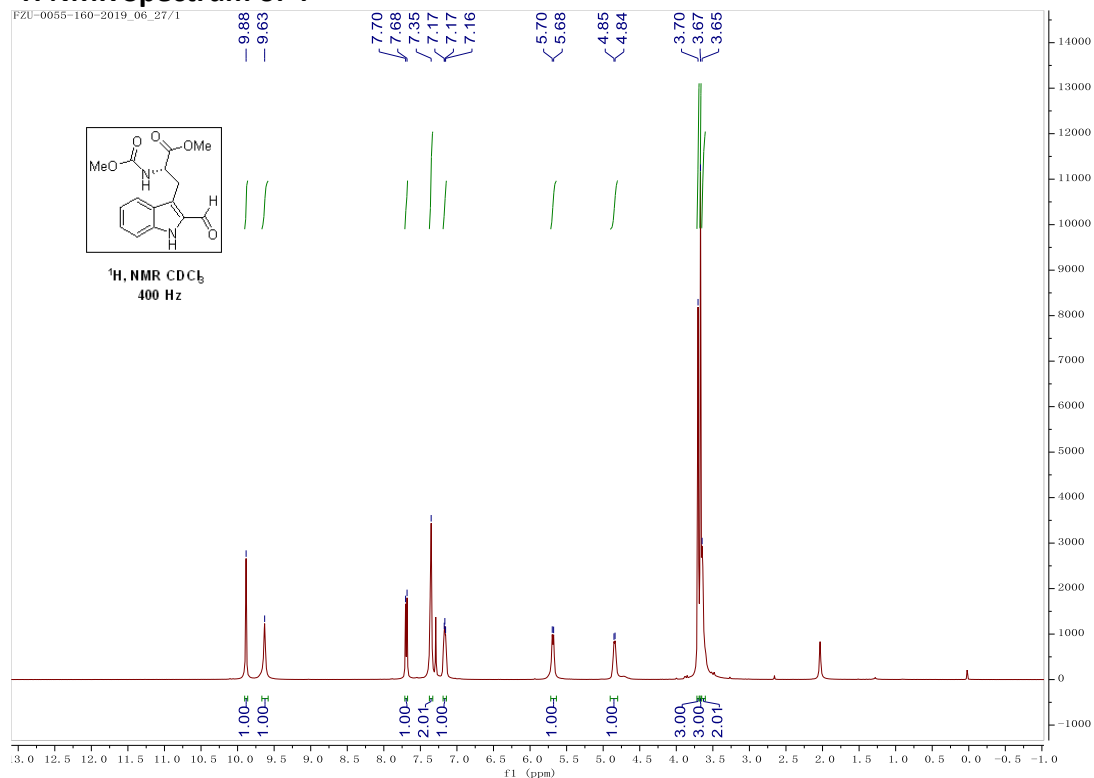

# <sup>13</sup>C NMR Spectrum of 4

FZU-0055-160 (C13)-2019\_06\_27/2

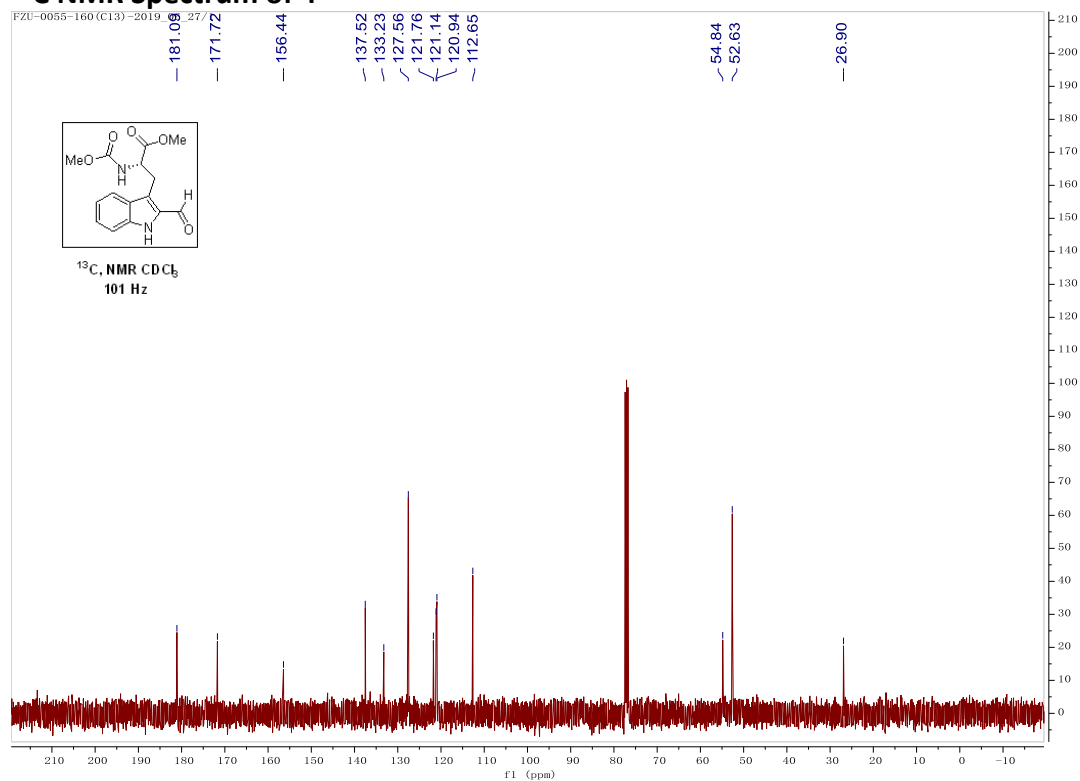

# <sup>1</sup>H NMR Spectrum of 5

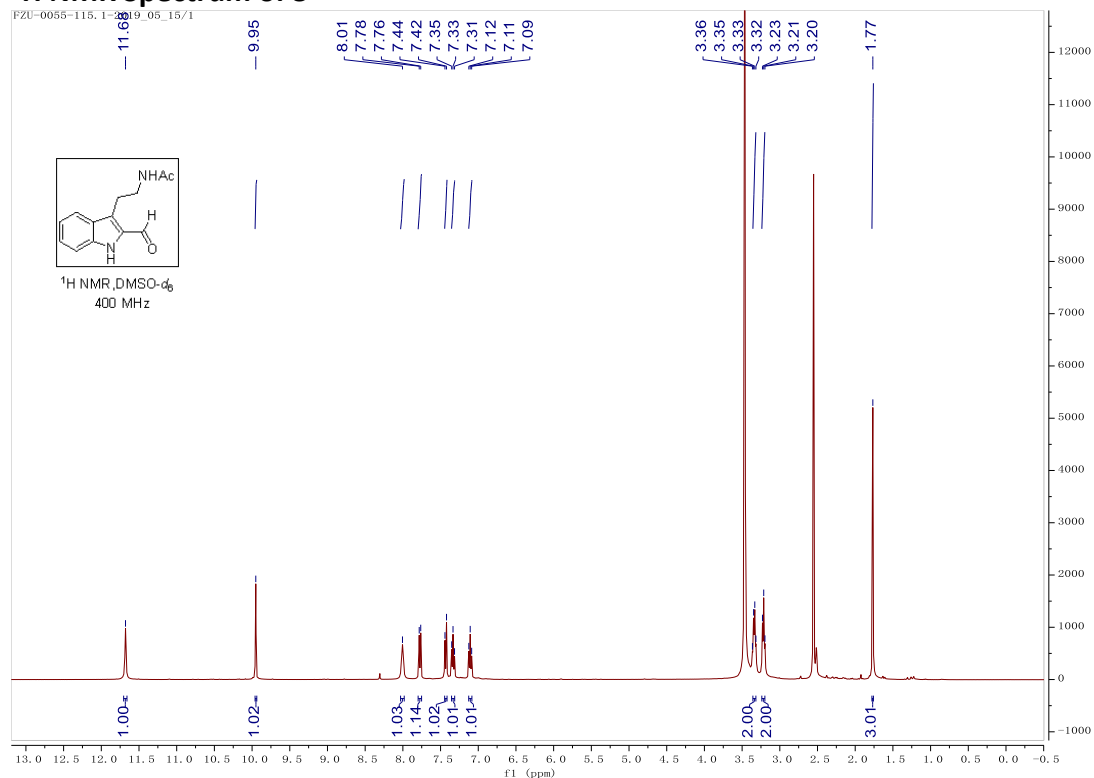

# <sup>13</sup>C NMR Spectrum of 5

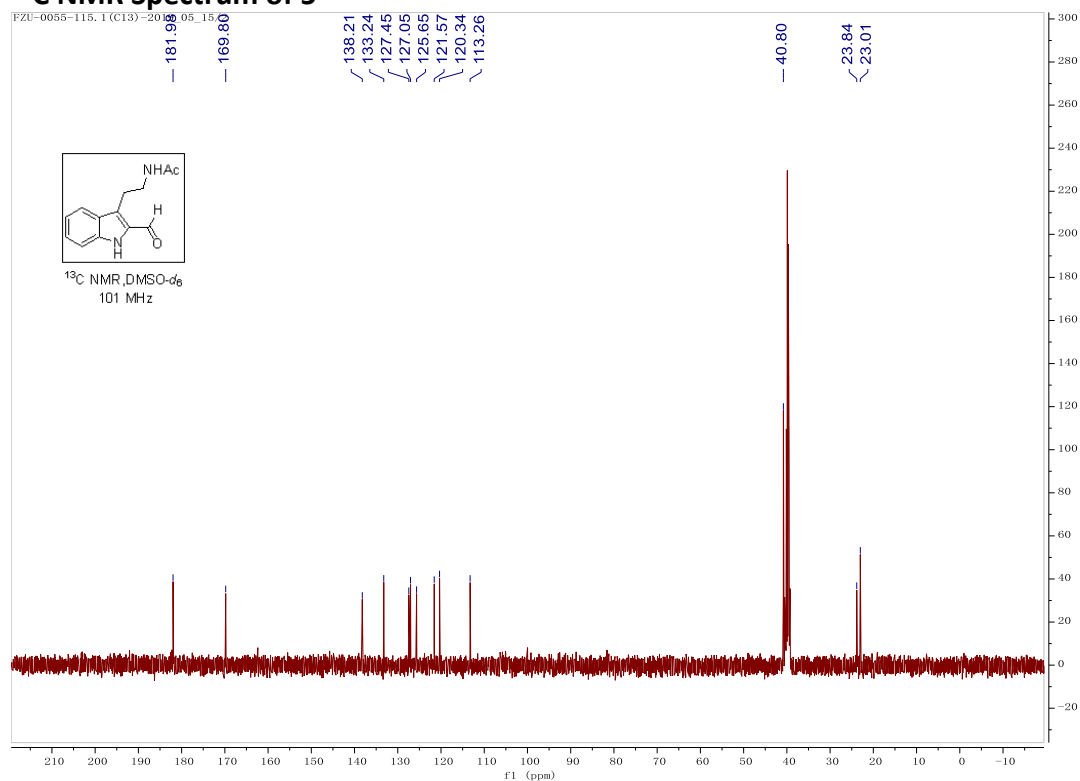

# <sup>1</sup>H NMR Spectrum of 6

FZU-0055-128-2019\_05\_27/1

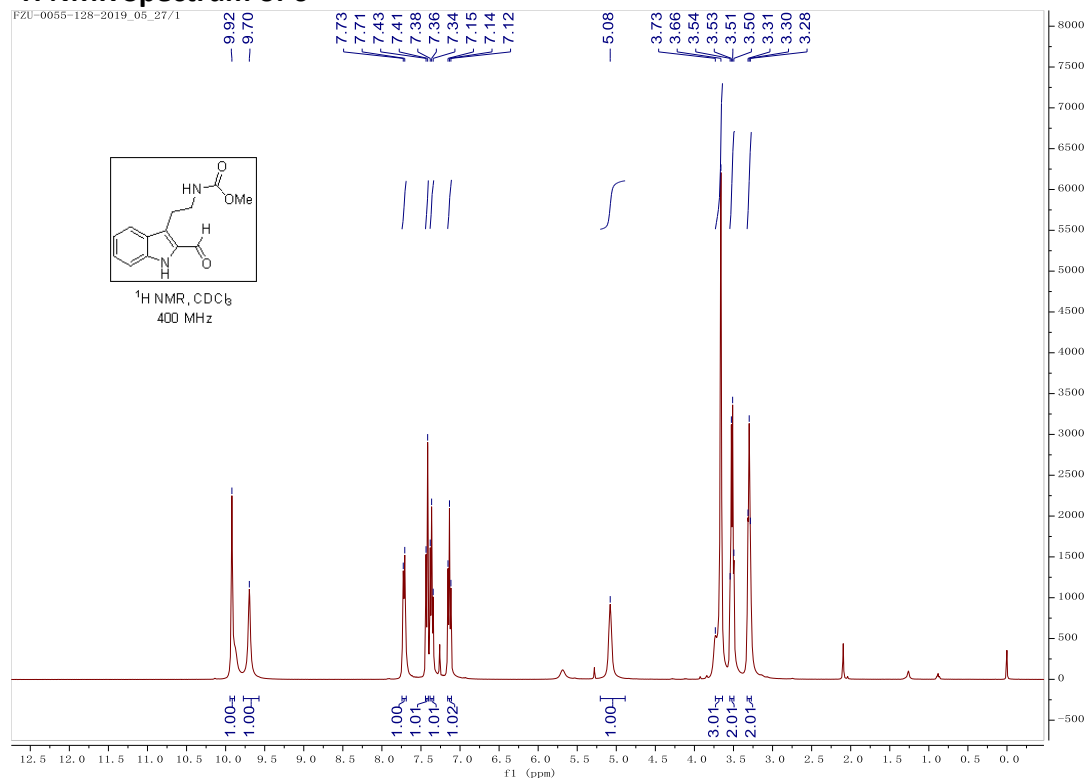

# <sup>13</sup>C NMR Spectrum of 6

FZU-0055-128-(C13)-2019\_05\_27/2

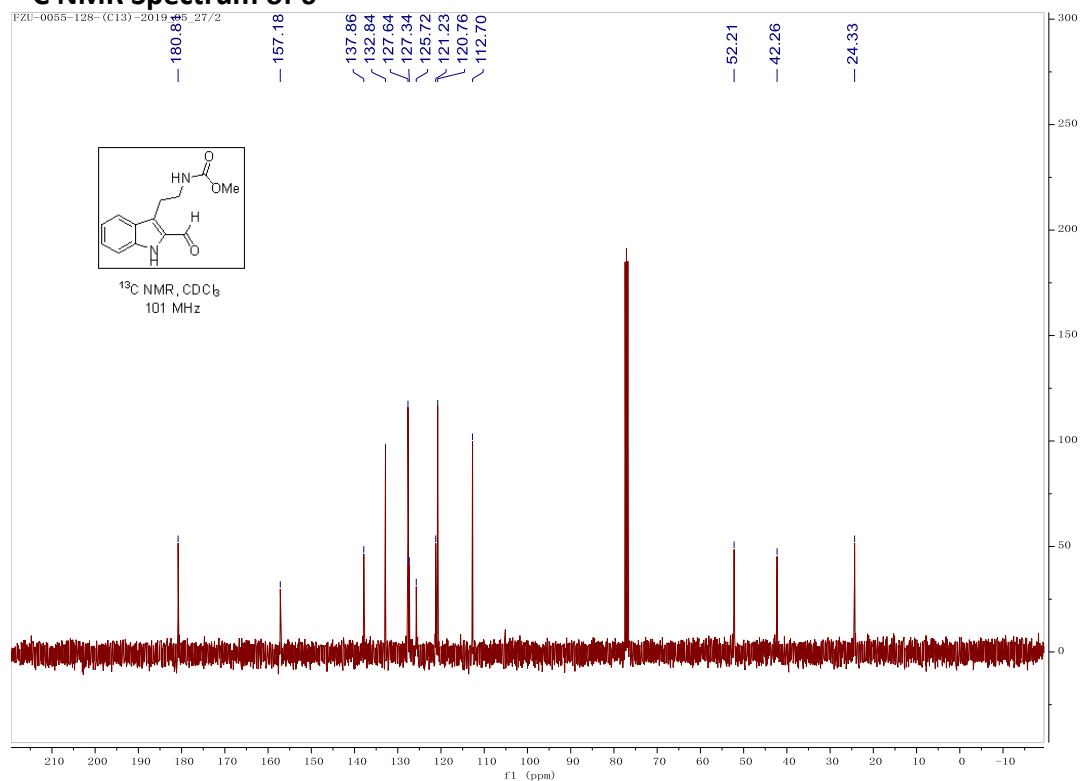

# <sup>1</sup>H NMR Spectrum of 7

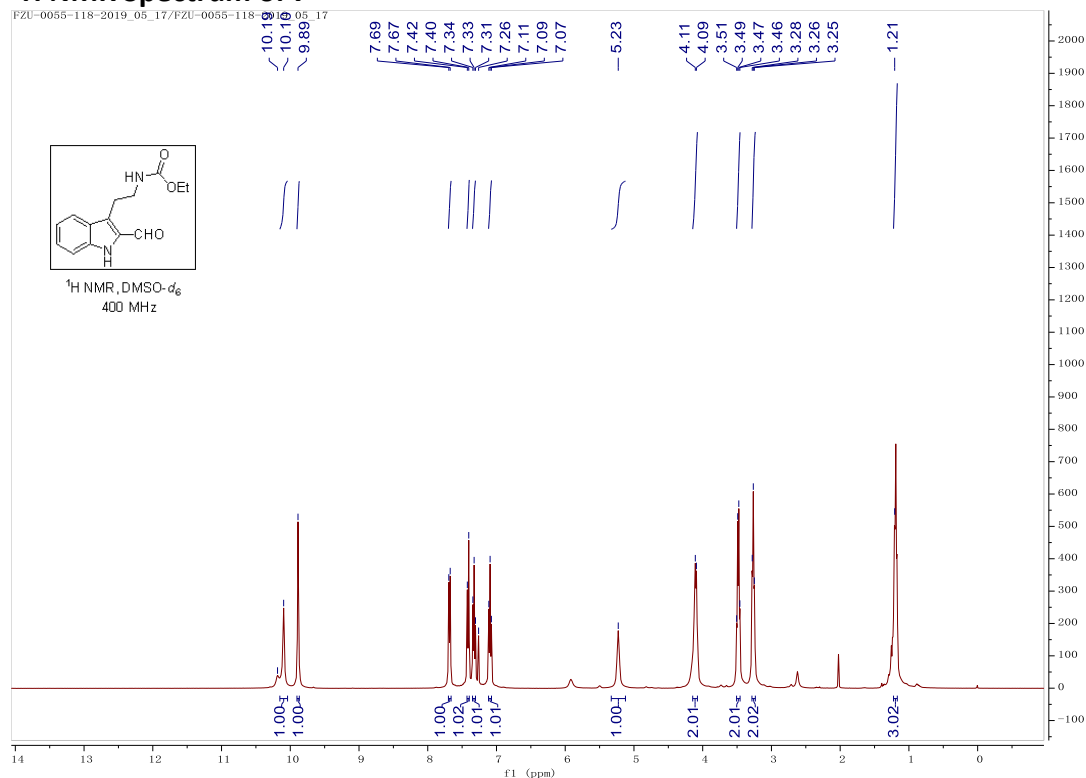

# <sup>13</sup>C NMR Spectrum of 7

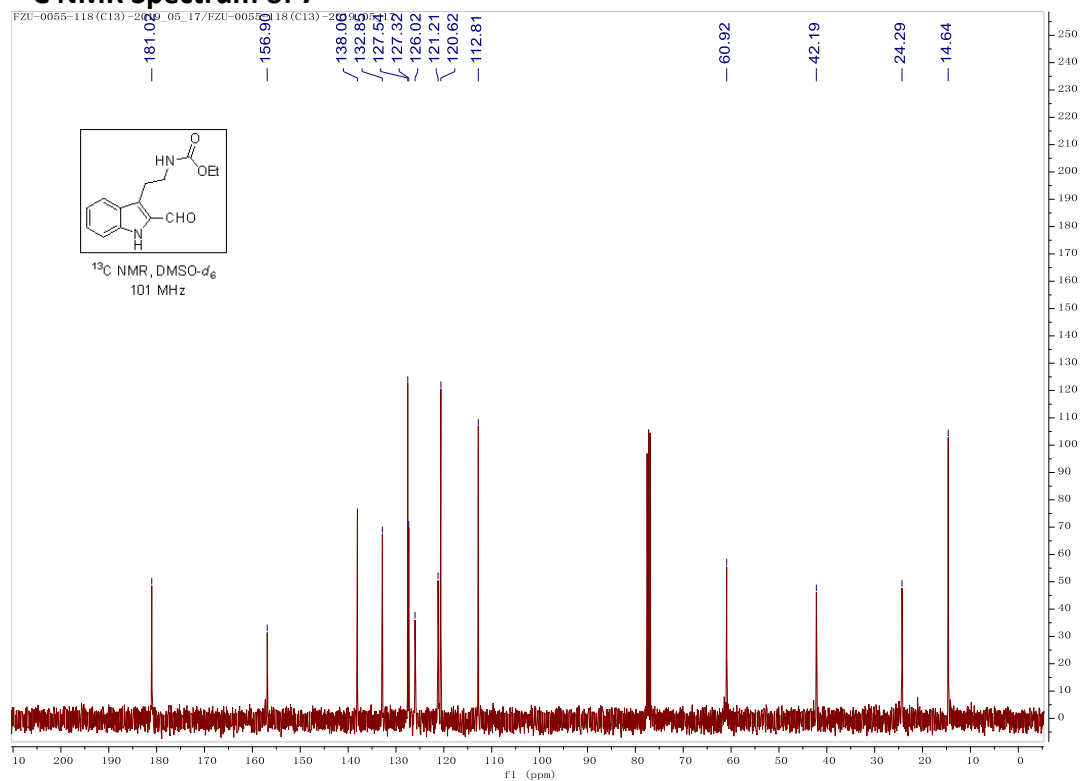

# <sup>1</sup>H NMR Spectrum of 8

FZU-0055-135-2019\_06\_03/1

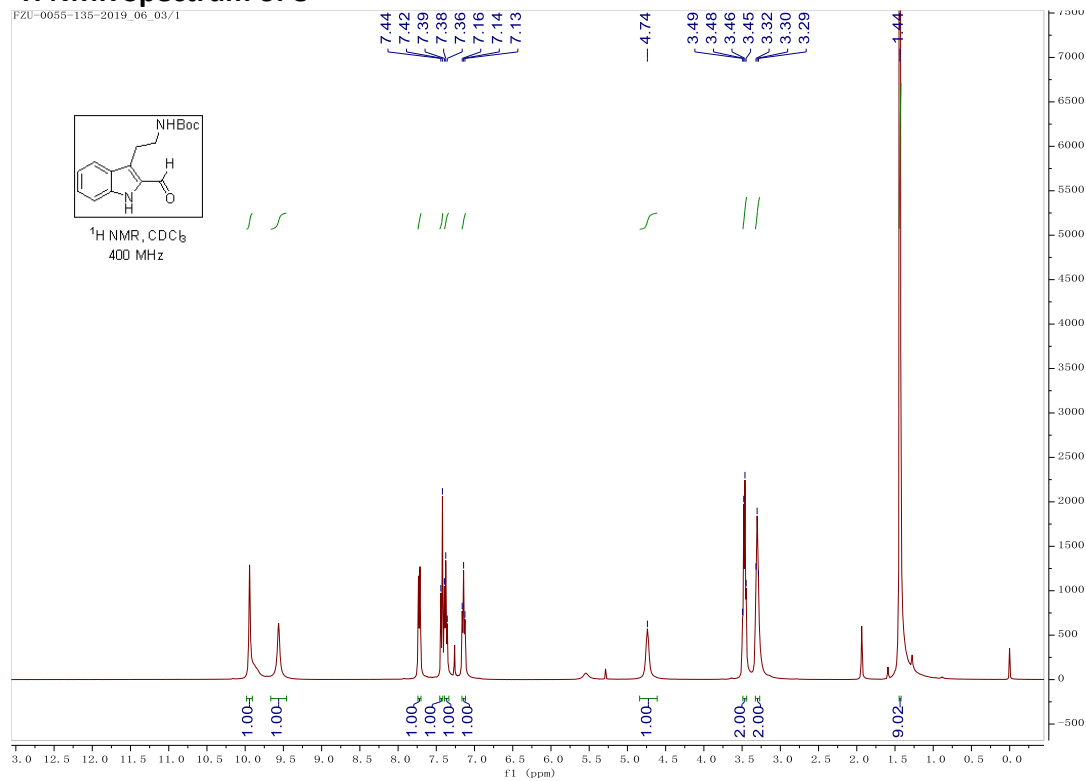

# <sup>13</sup>C NMR Spectrum of 8

FZU-0055-135-(C13)-2019\_06\_05/2

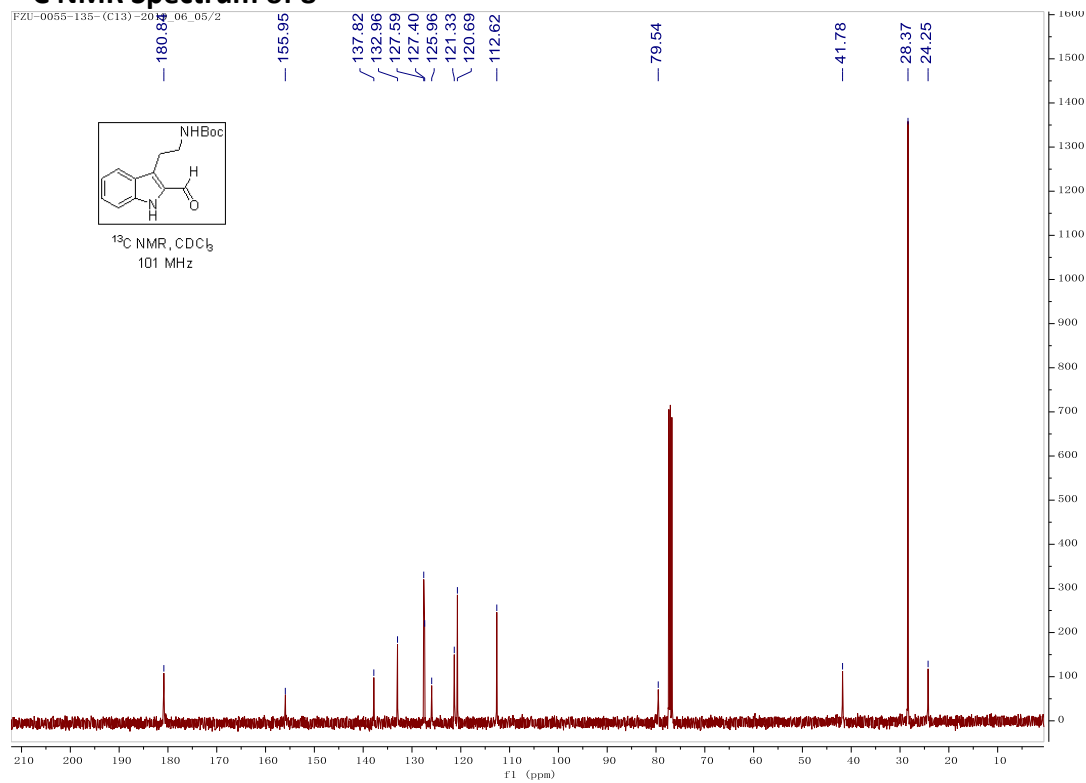

# **<sup>1</sup>H NMR Spectrum of 9**

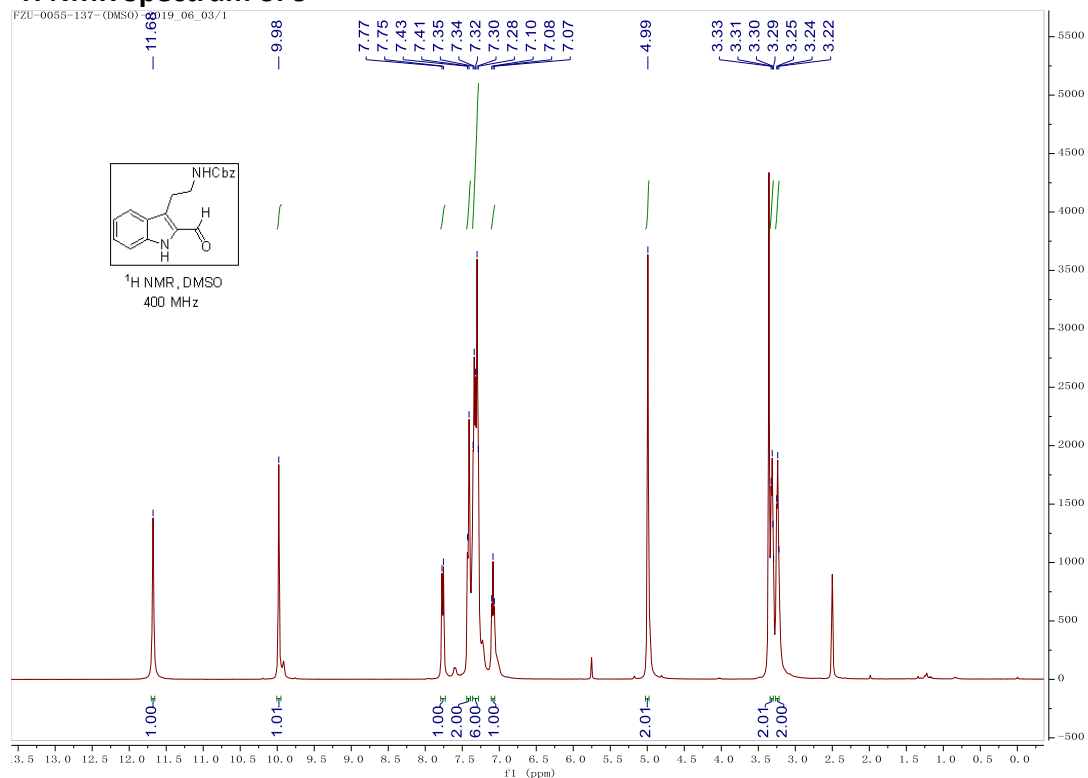

# **<sup>13</sup>C NMR Spectrum of 9**

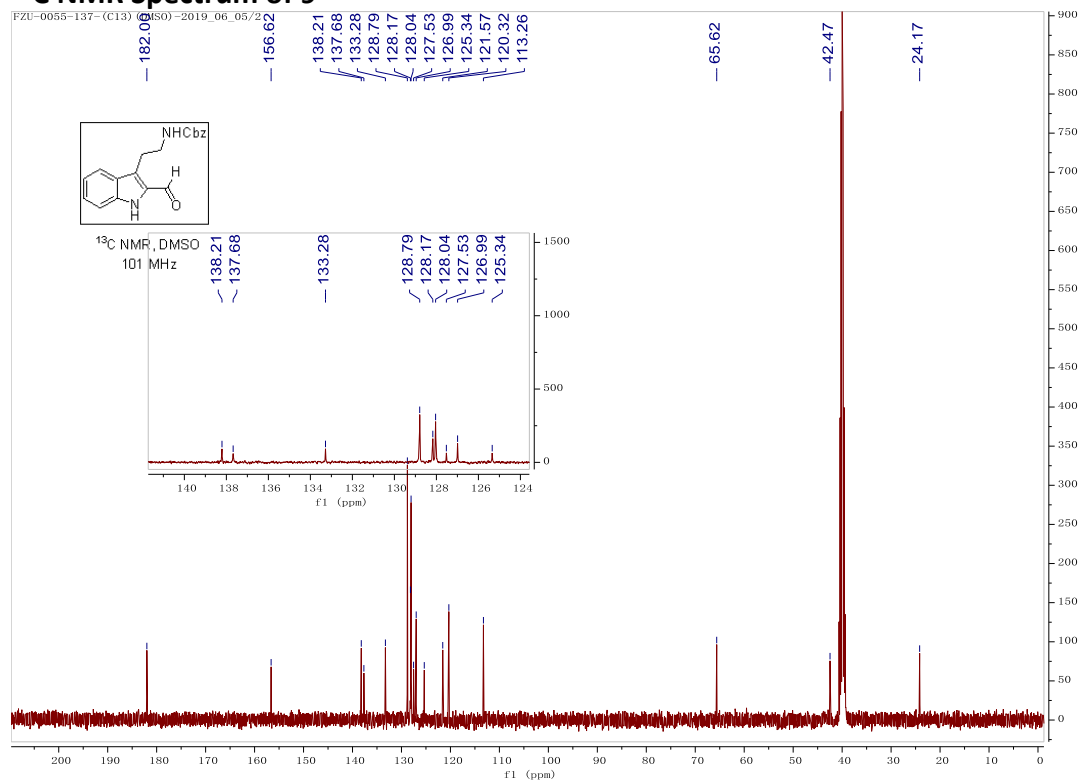

# **<sup>1</sup>H NMR Spectrum of 10**

FZU-0055-126-2019\_05\_28/1

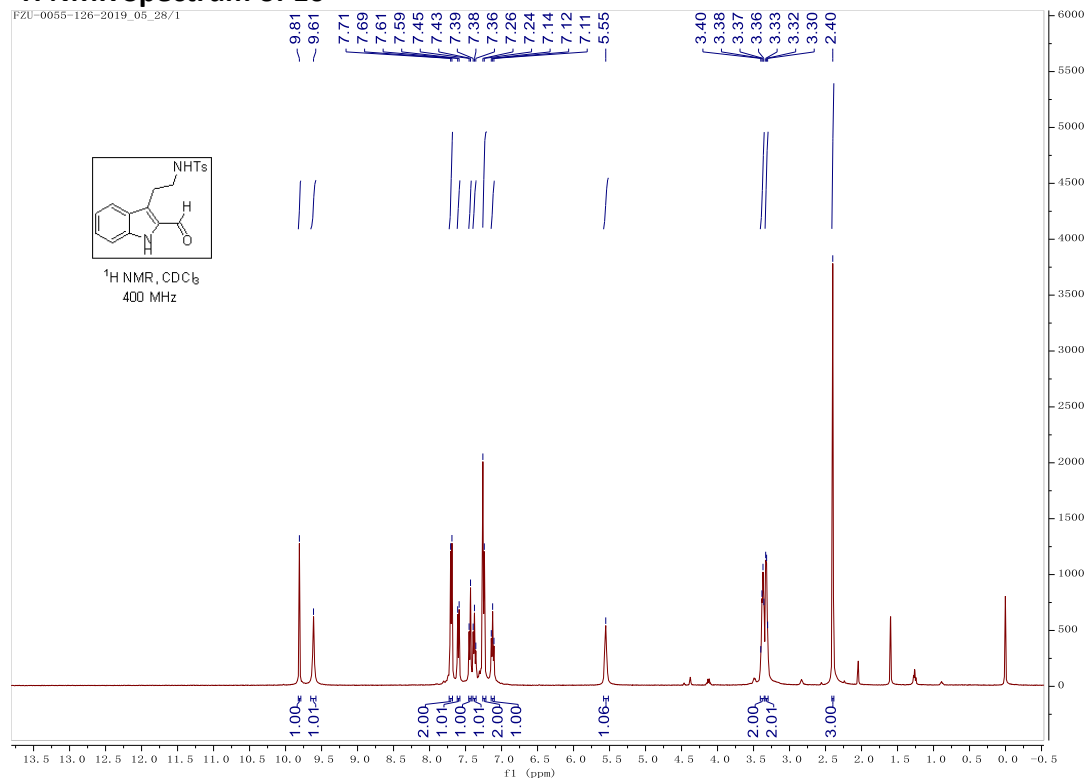

# **<sup>13</sup>C NMR Spectrum of 10**

FZU-0055-126-(DMSO) (C13) 2019\_06\_01/2

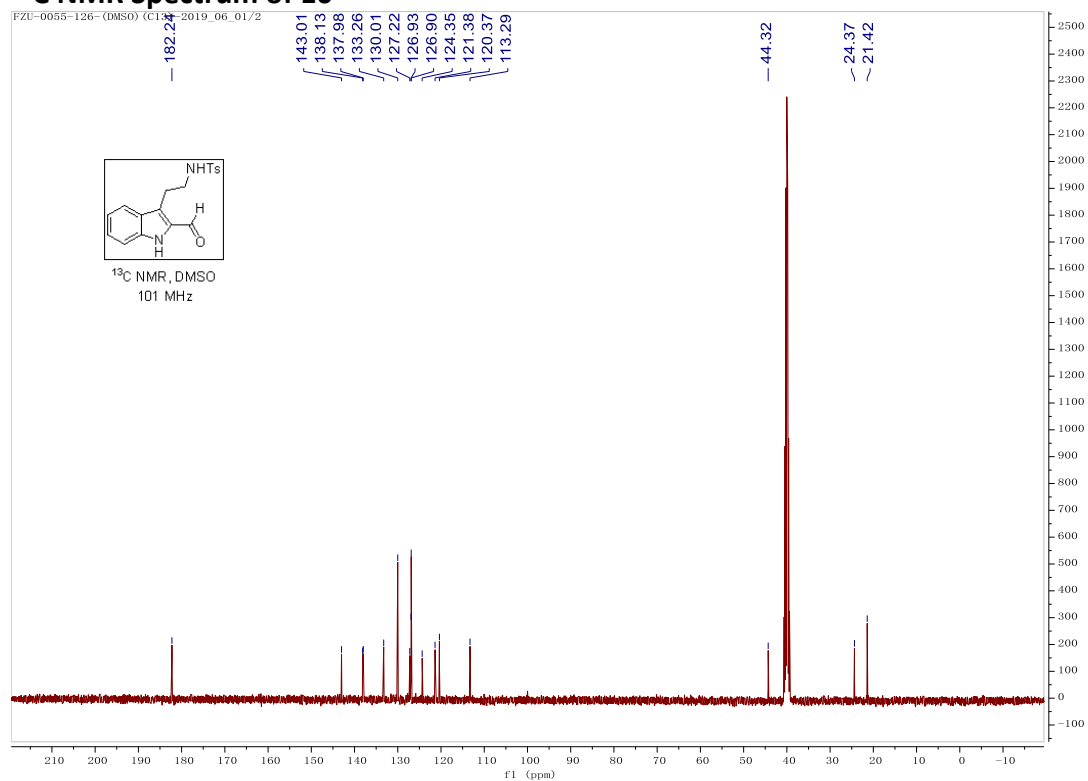

# <sup>1</sup>H NMR Spectrum of 11

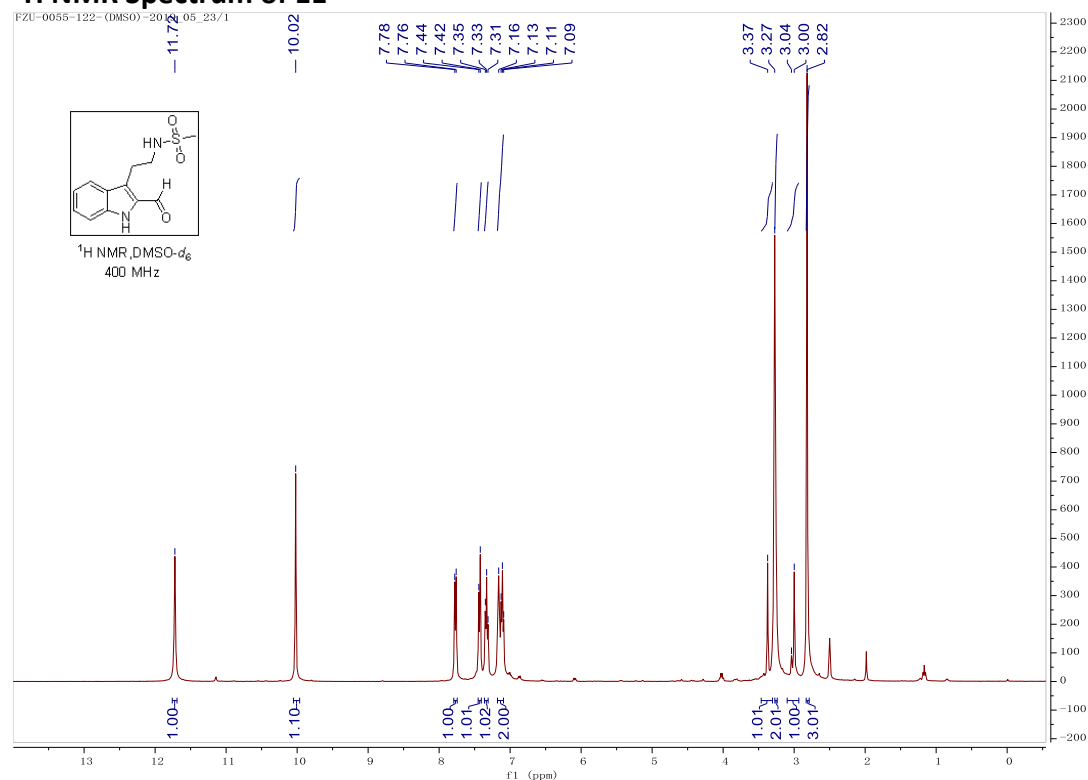

# <sup>13</sup>C NMR Spectrum of 11

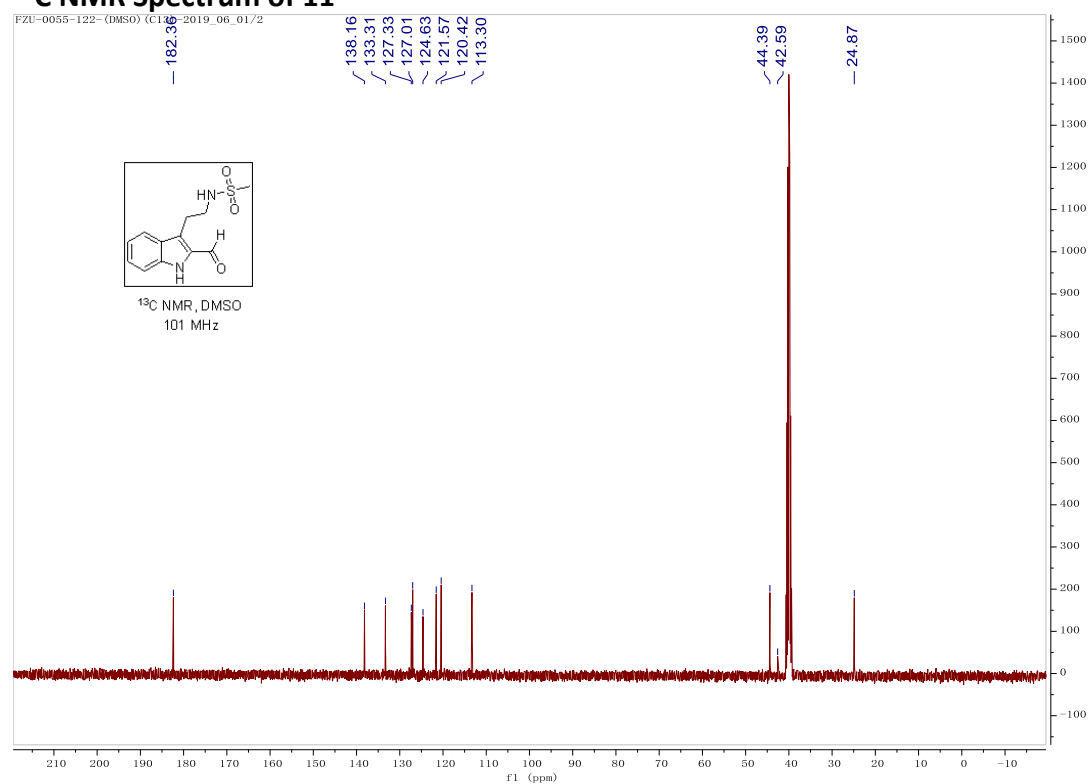



# <sup>1</sup>H NMR Spectrum of 12

FZU-0055-138-2019\_06\_04/1

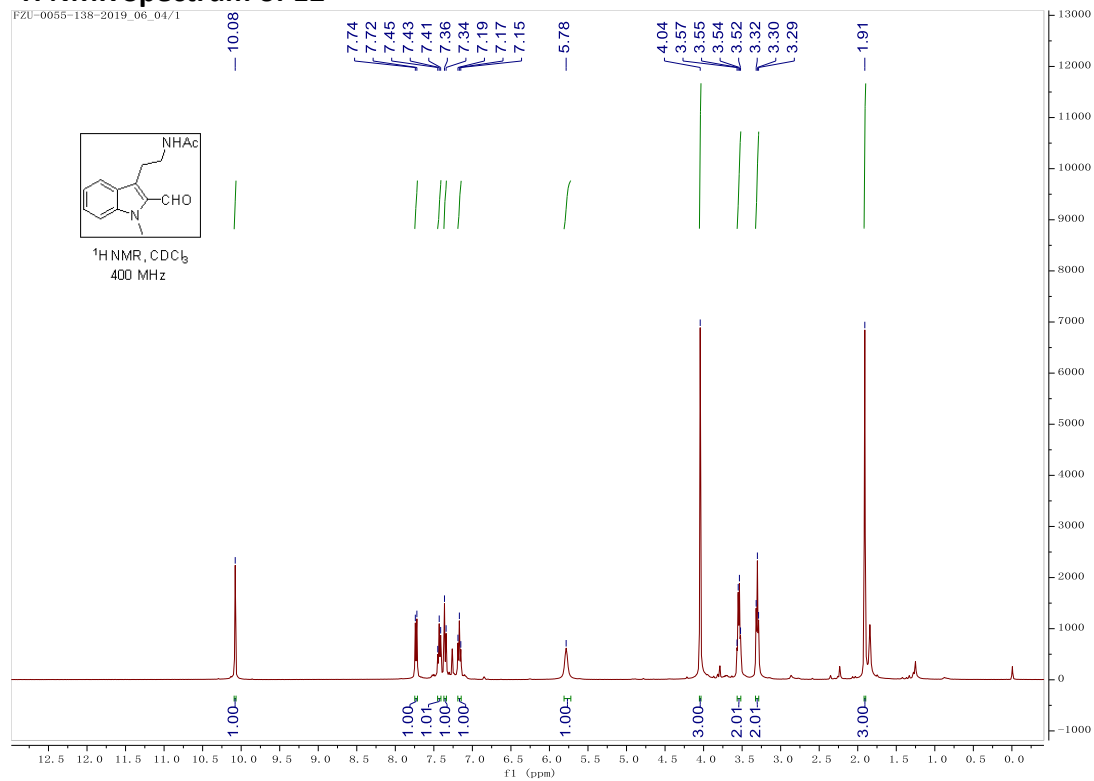

# <sup>13</sup>C NMR Spectrum of 12

FZU-0055-138-(C13)-2019\_06\_06/2

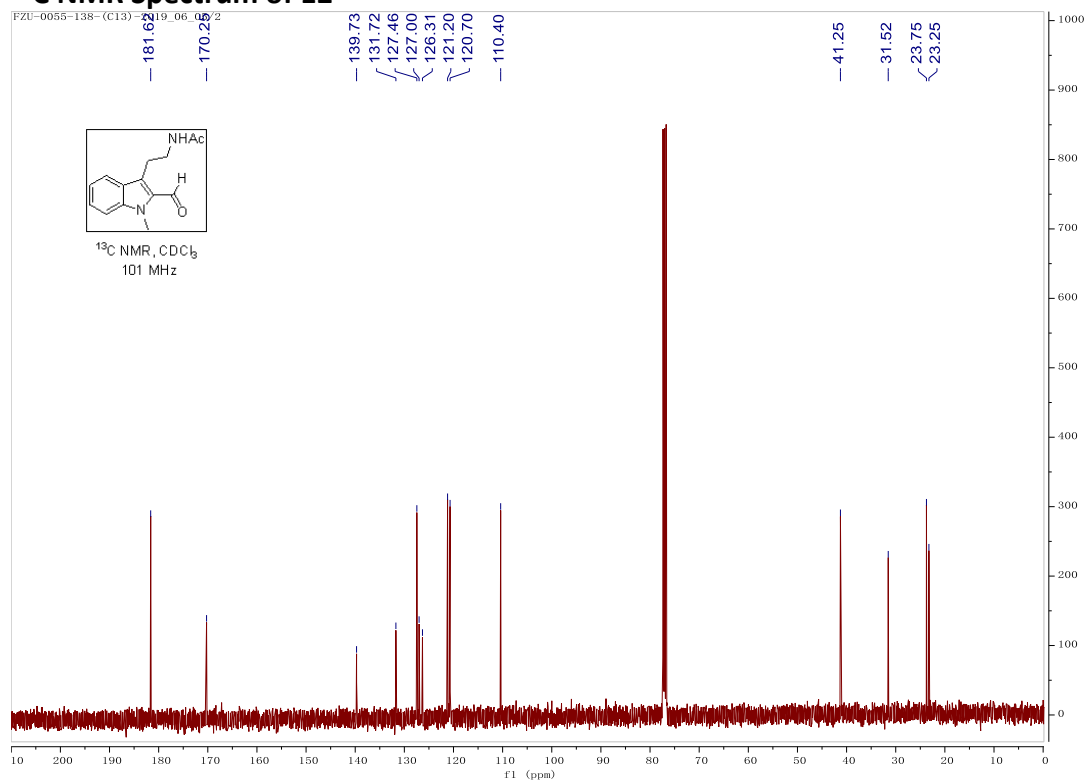

# <sup>1</sup>H NMR Spectrum of 13

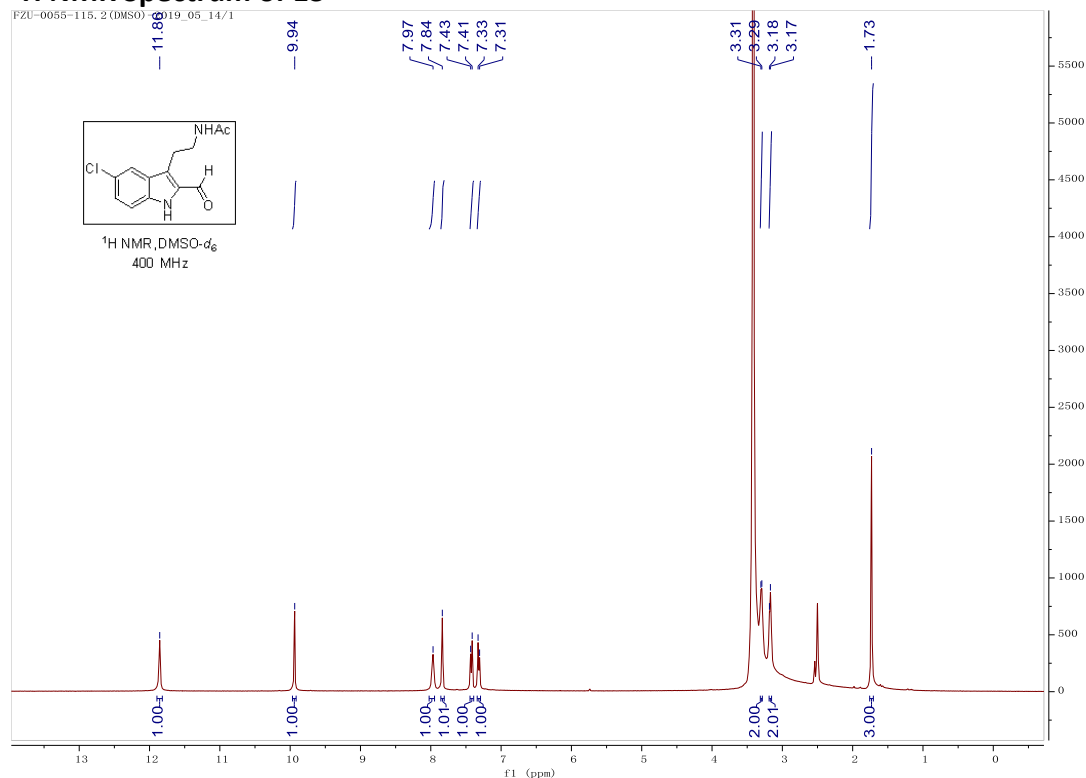

# <sup>13</sup>C NMR Spectrum of 13

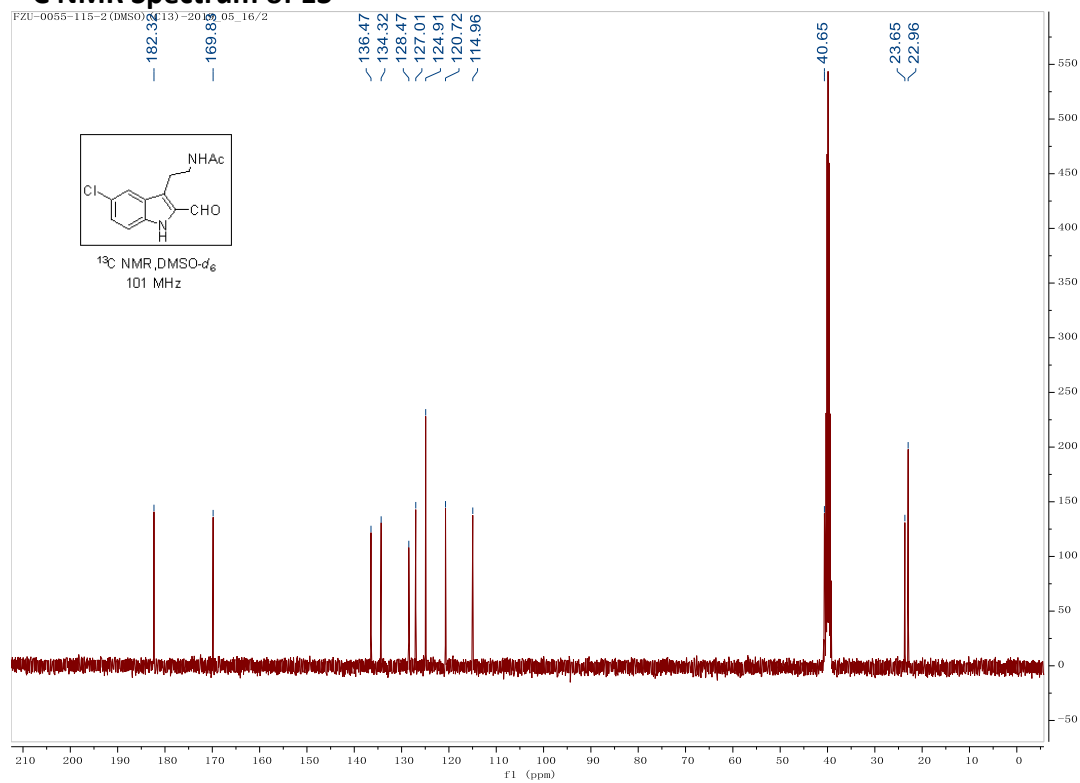

# <sup>1</sup>H NMR Spectrum of 14

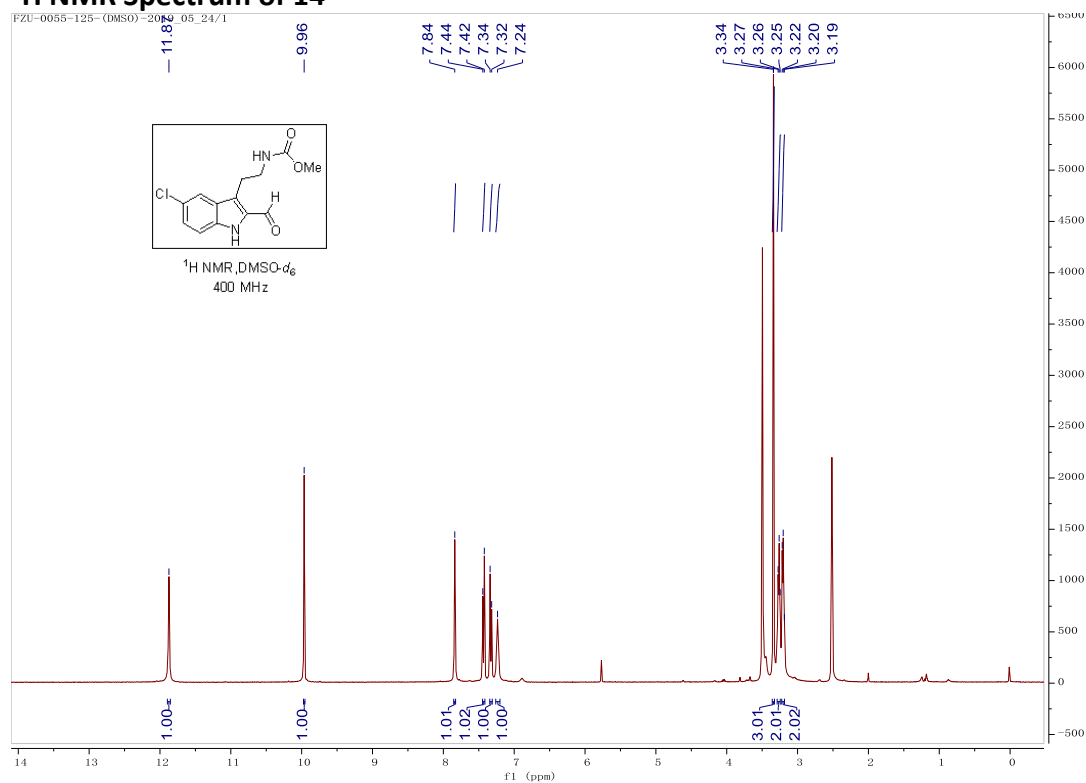

# <sup>13</sup>C NMR Spectrum of 14

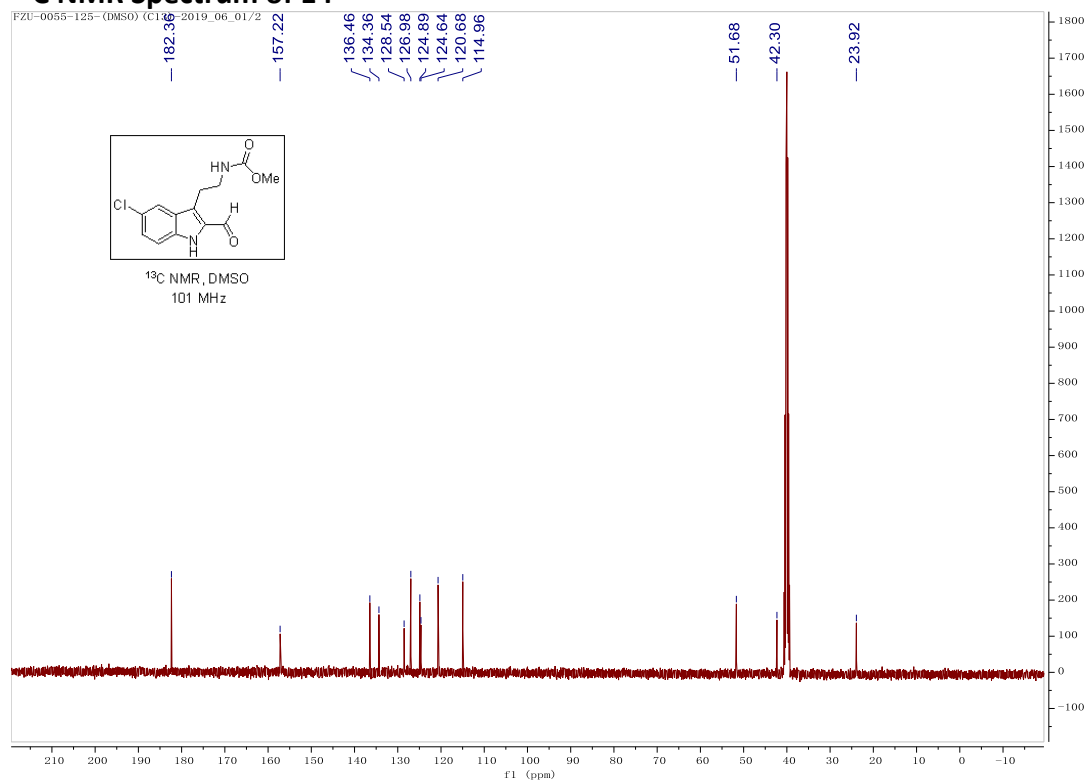

# <sup>1</sup>H NMR Spectrum of 15

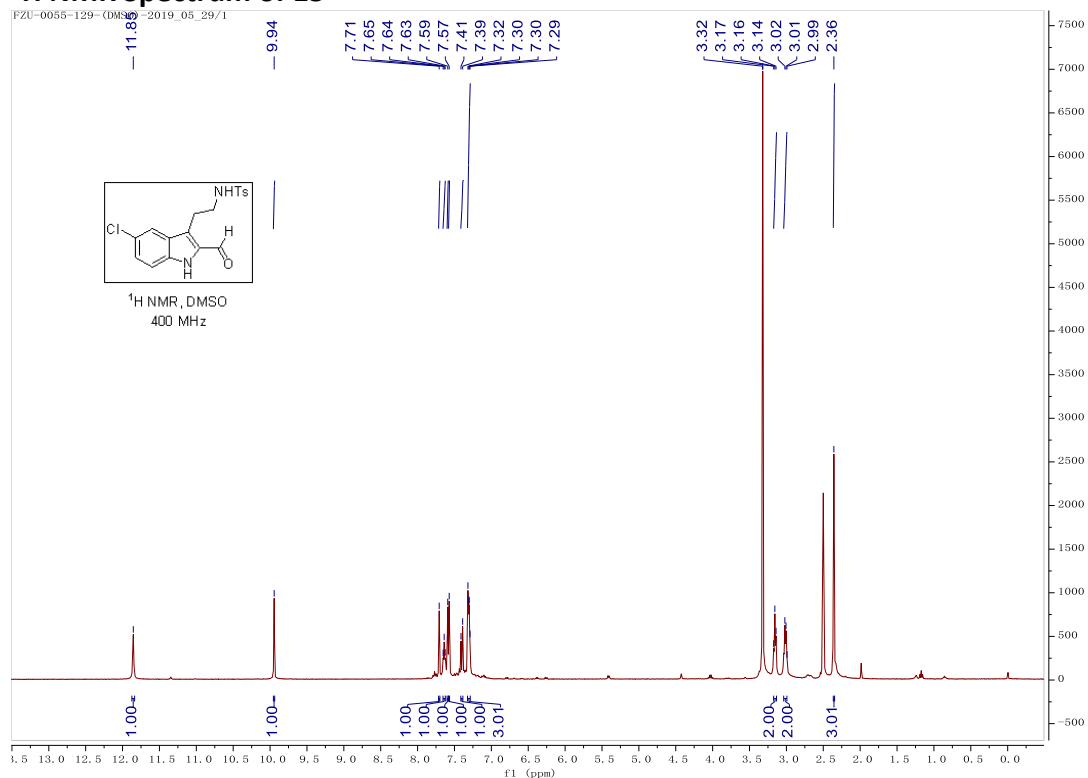

# <sup>13</sup>C NMR Spectrum of 15

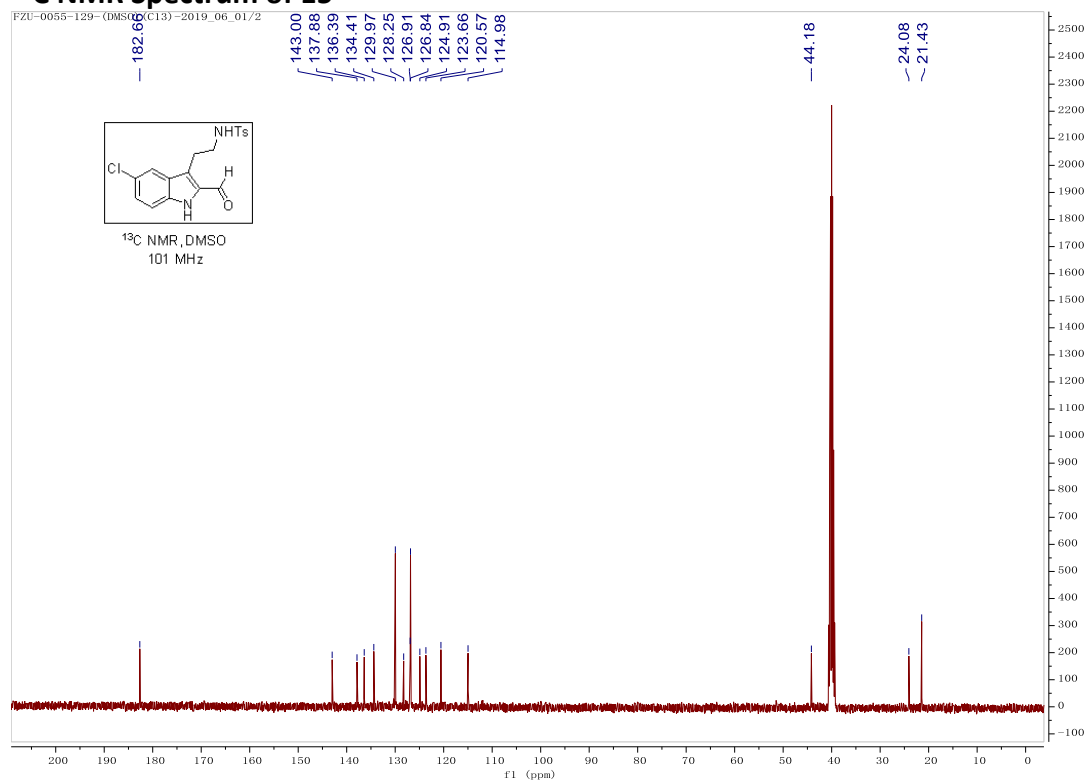

# <sup>1</sup>H NMR Spectrum of 16

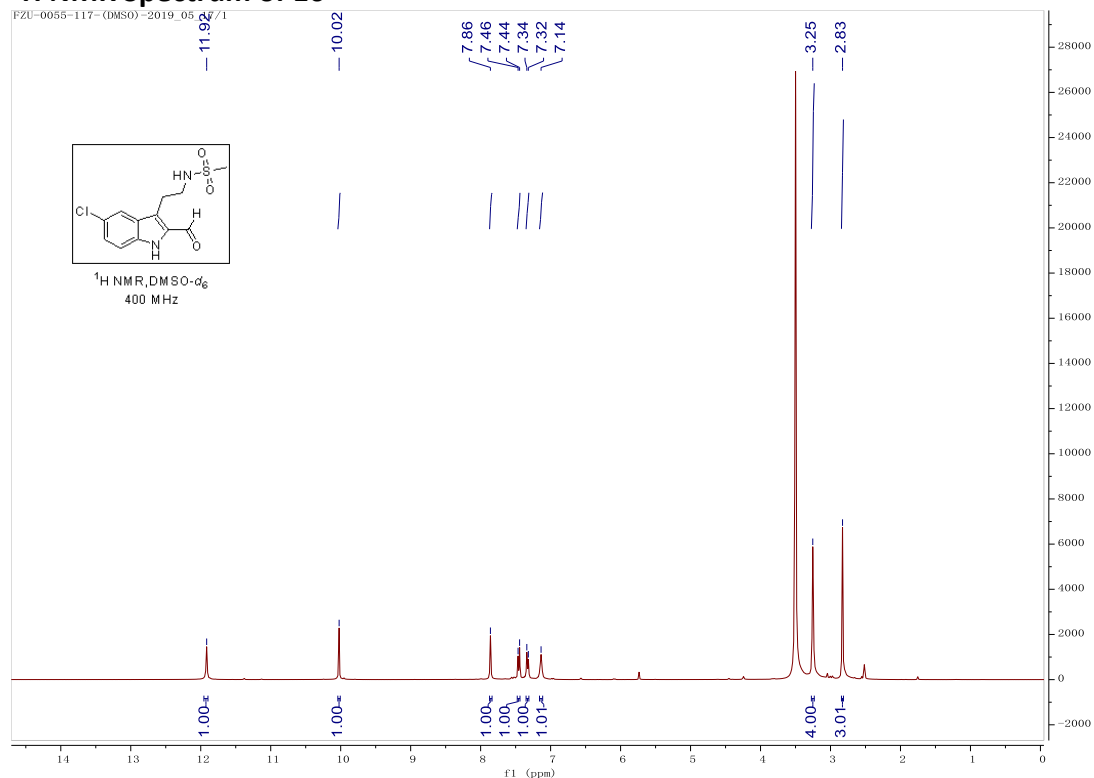

# <sup>13</sup>C NMR Spectrum of 16

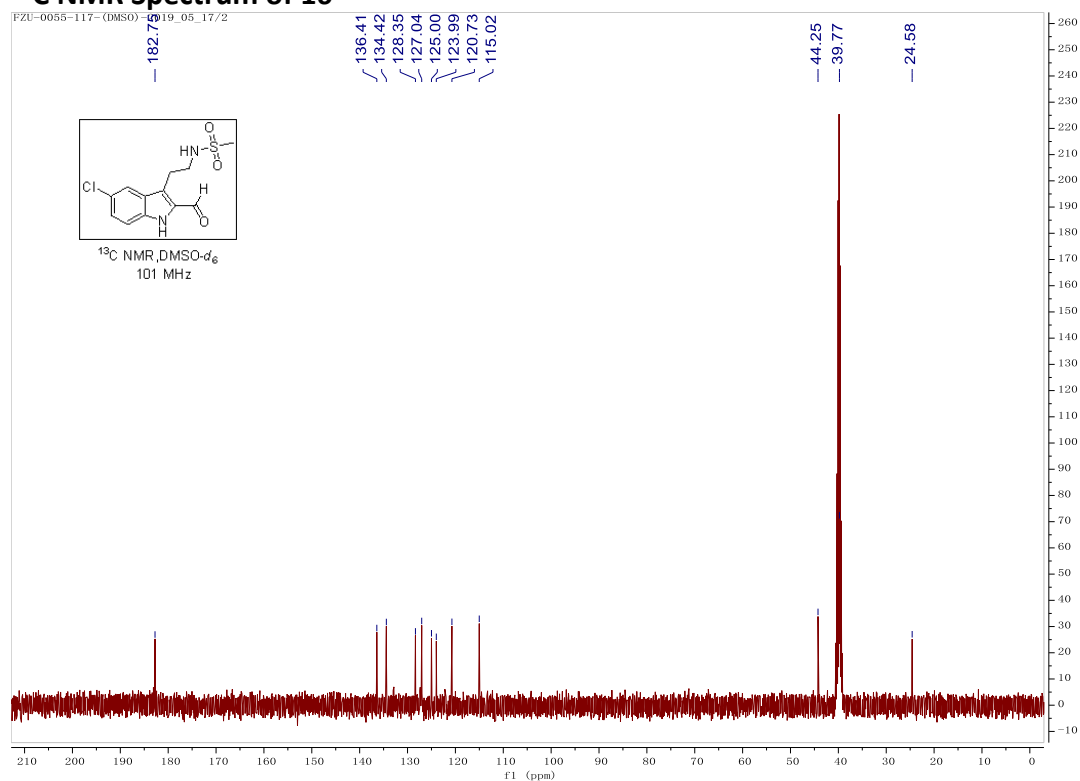

# <sup>1</sup>H NMR Spectrum of 17

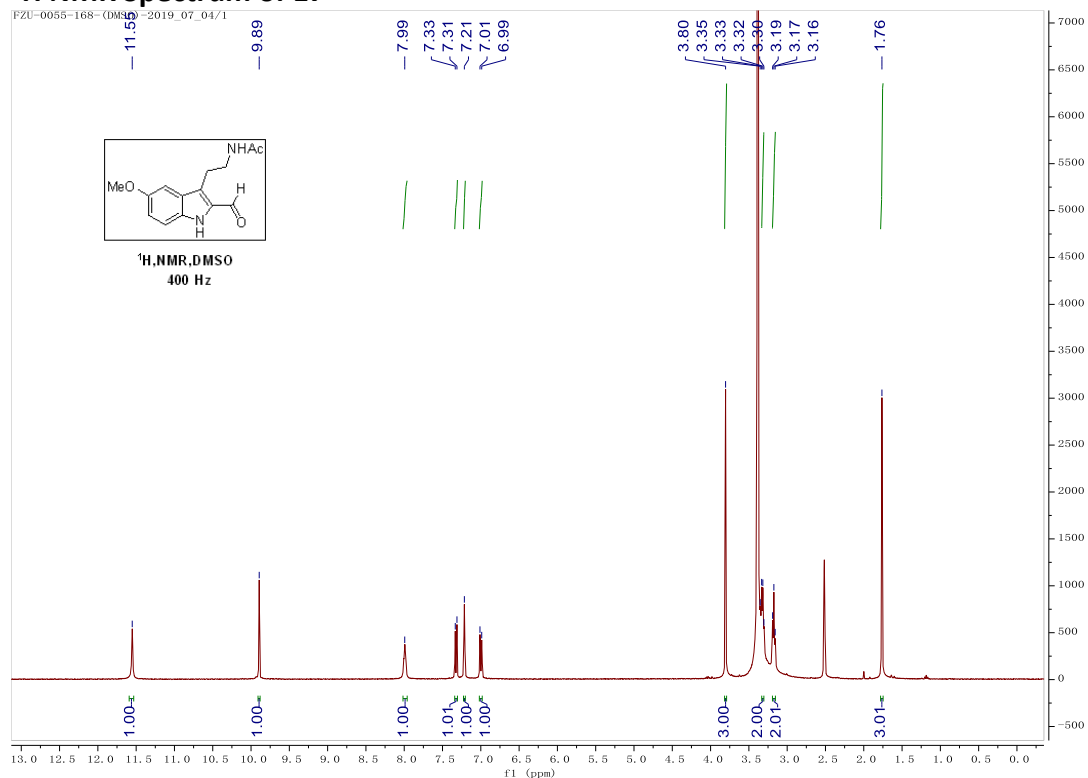

# <sup>13</sup>C NMR Spectrum of 17

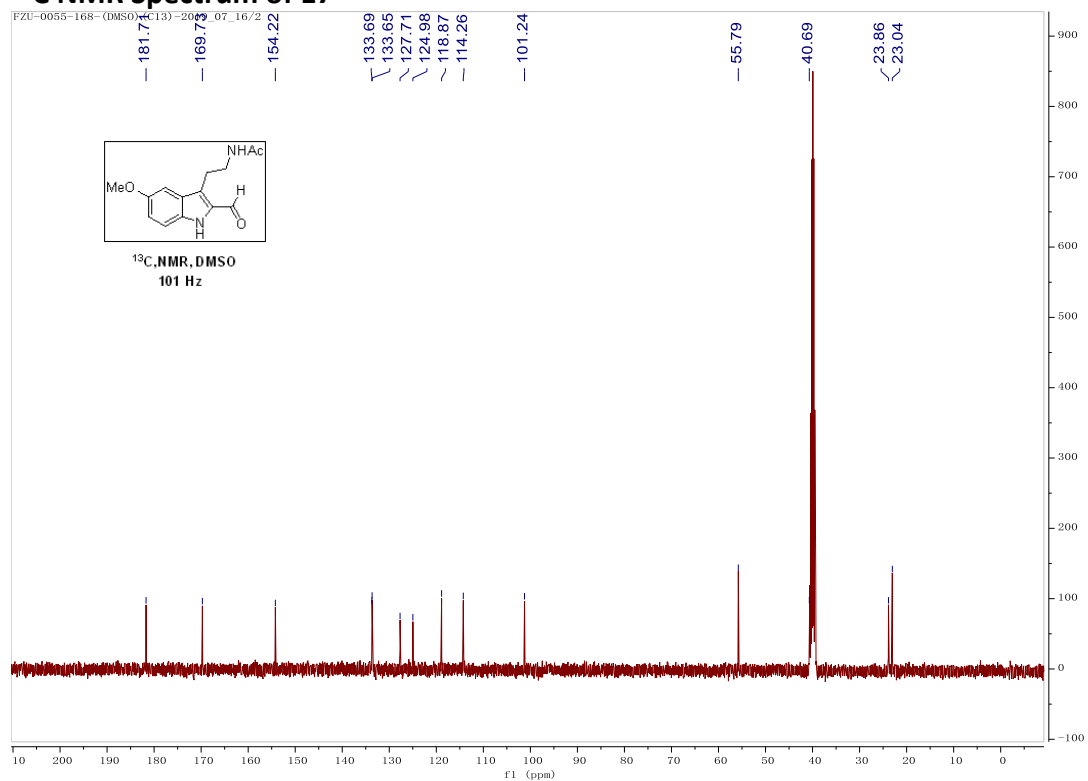

# <sup>1</sup>H NMR Spectrum of 18

FZU-0055-169-2019\_07\_14/1

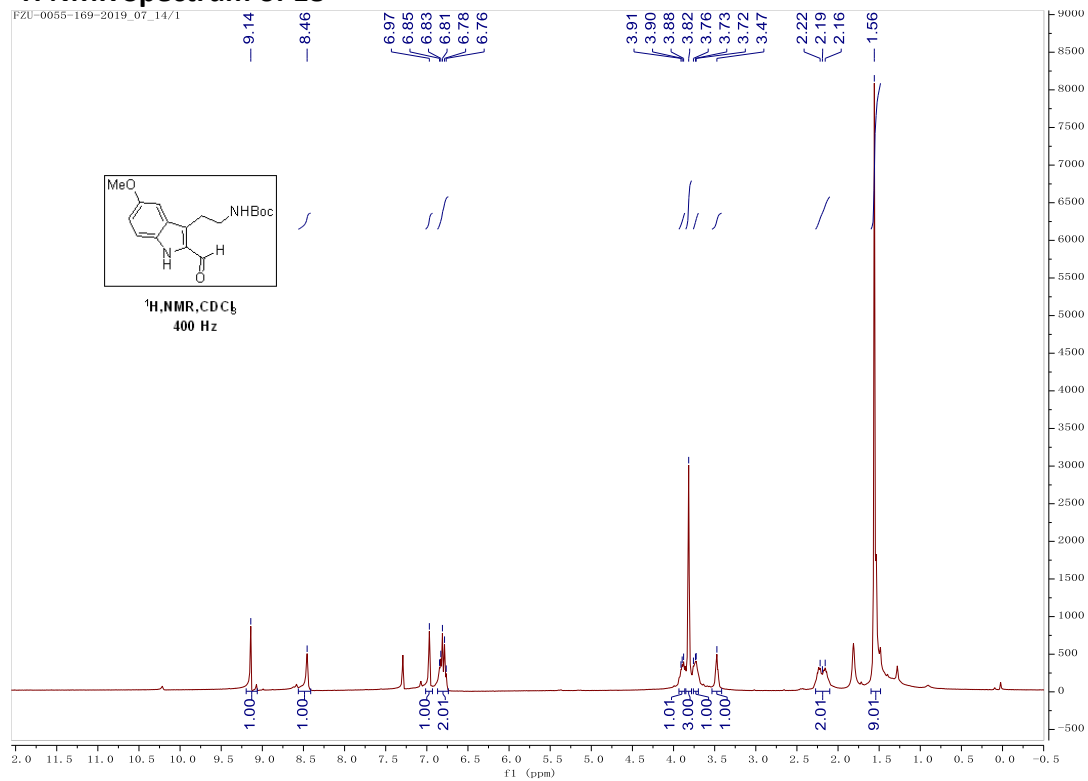

# <sup>13</sup>C NMR Spectrum of 18

FZU-0055-169-(C13)-2019\_07\_11/1

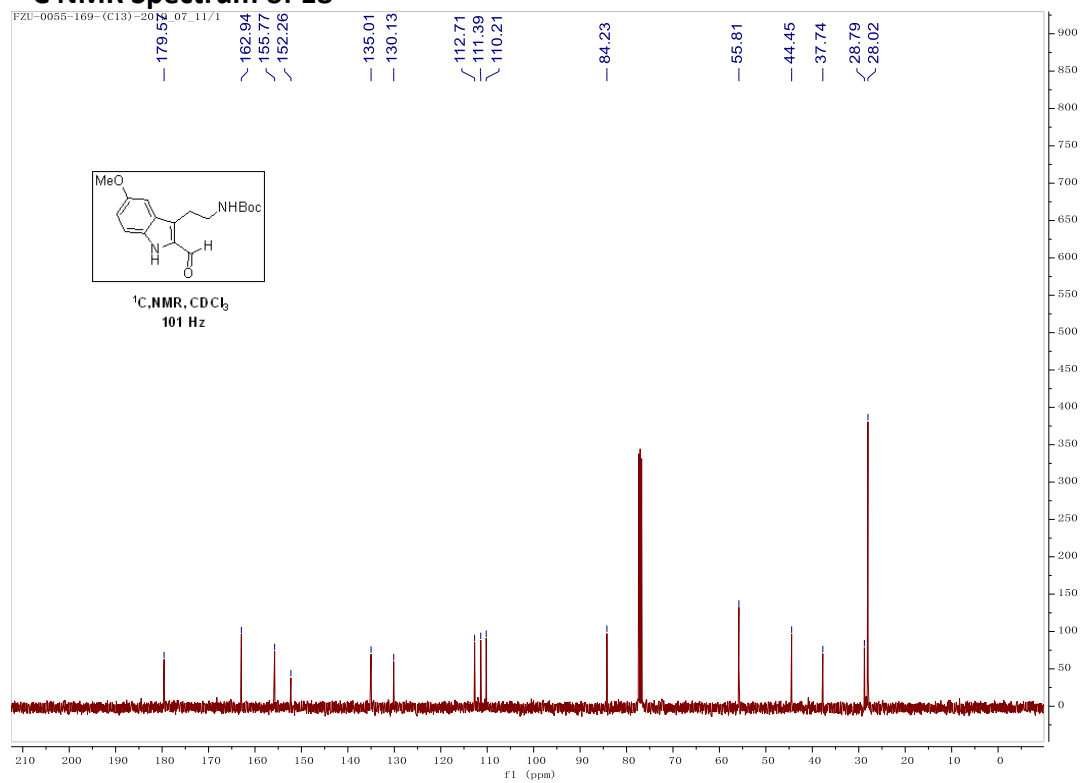

# <sup>1</sup>H NMR Spectrum of 19

FZU-0055-167-2019\_07\_04/1

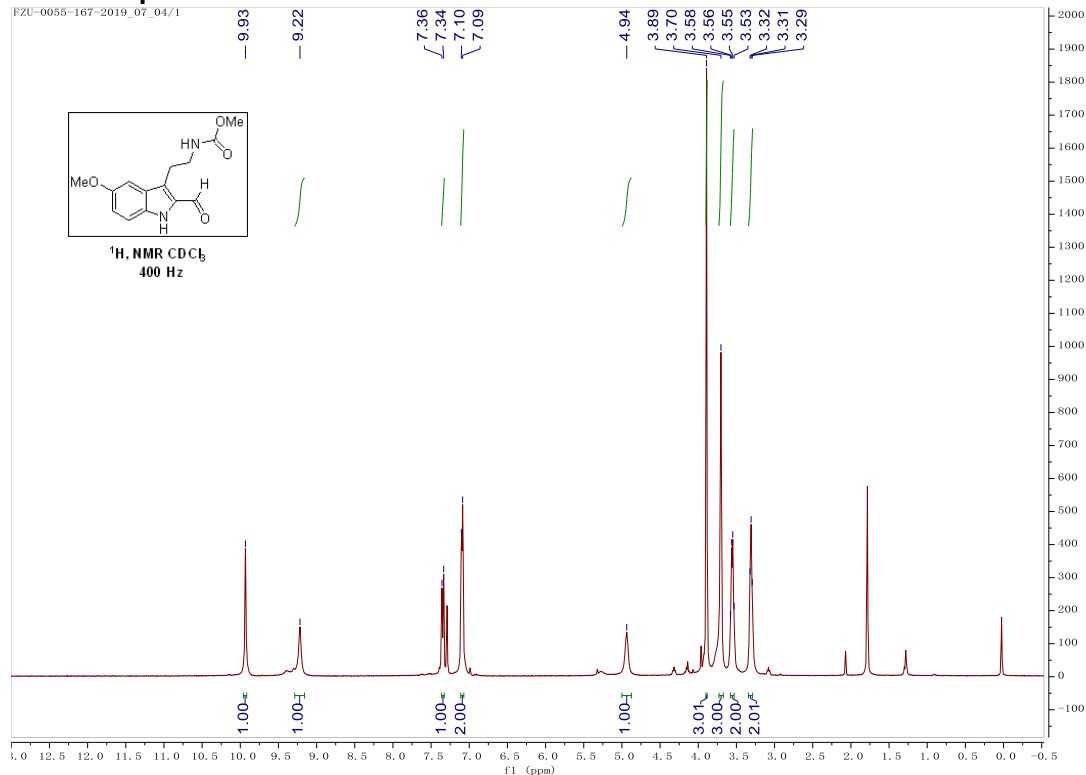

# <sup>13</sup>C NMR Spectrum of 19

FZU-0055-167-(DMSO)-2019\_07\_16/2

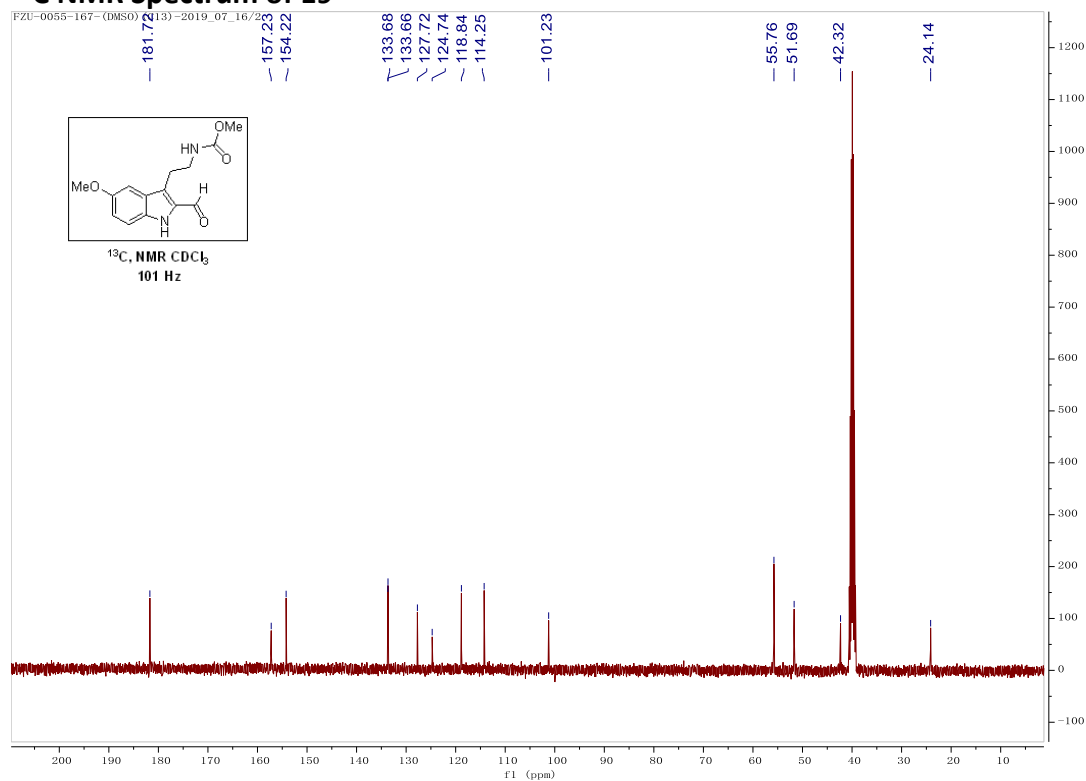



# <sup>1</sup>H NMR Spectrum of 20

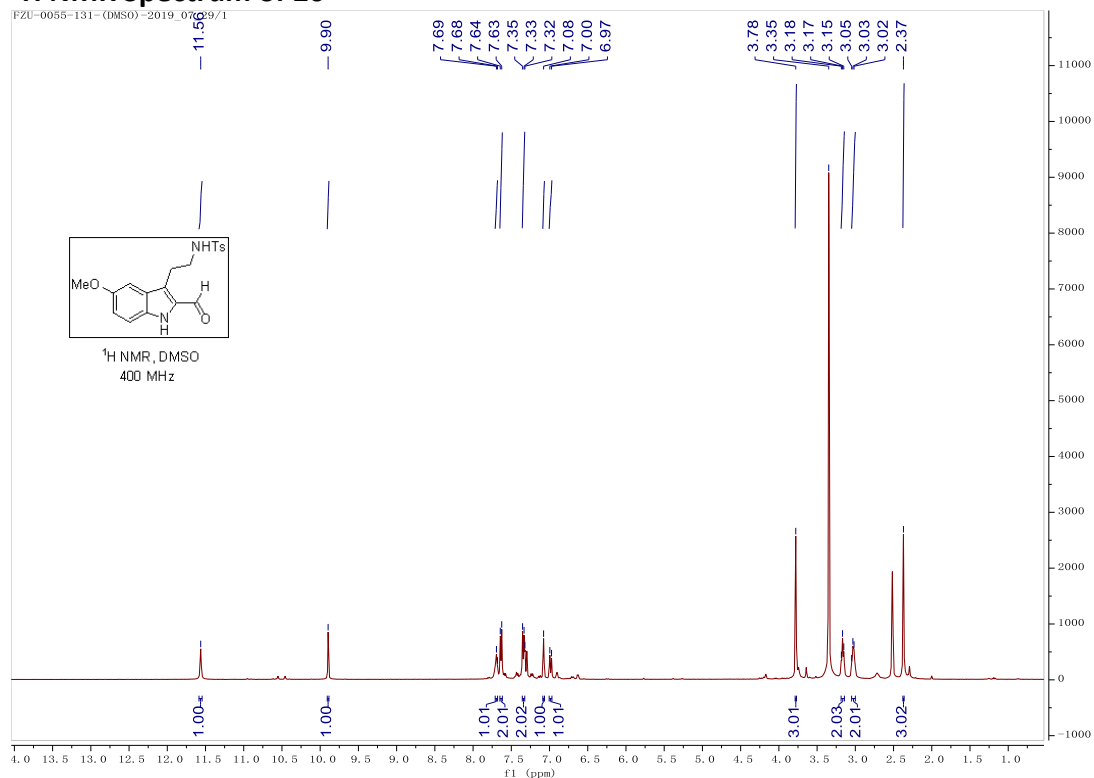

# <sup>13</sup>C NMR Spectrum of 20

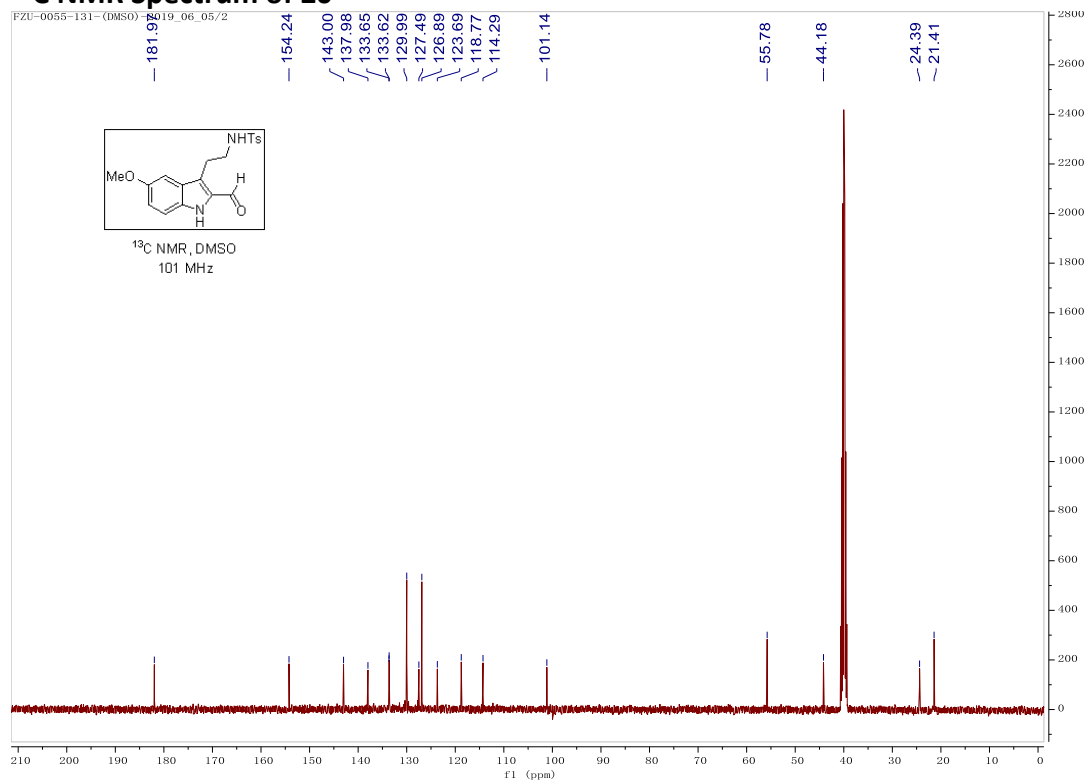

# <sup>1</sup>H NMR Spectrum of 21

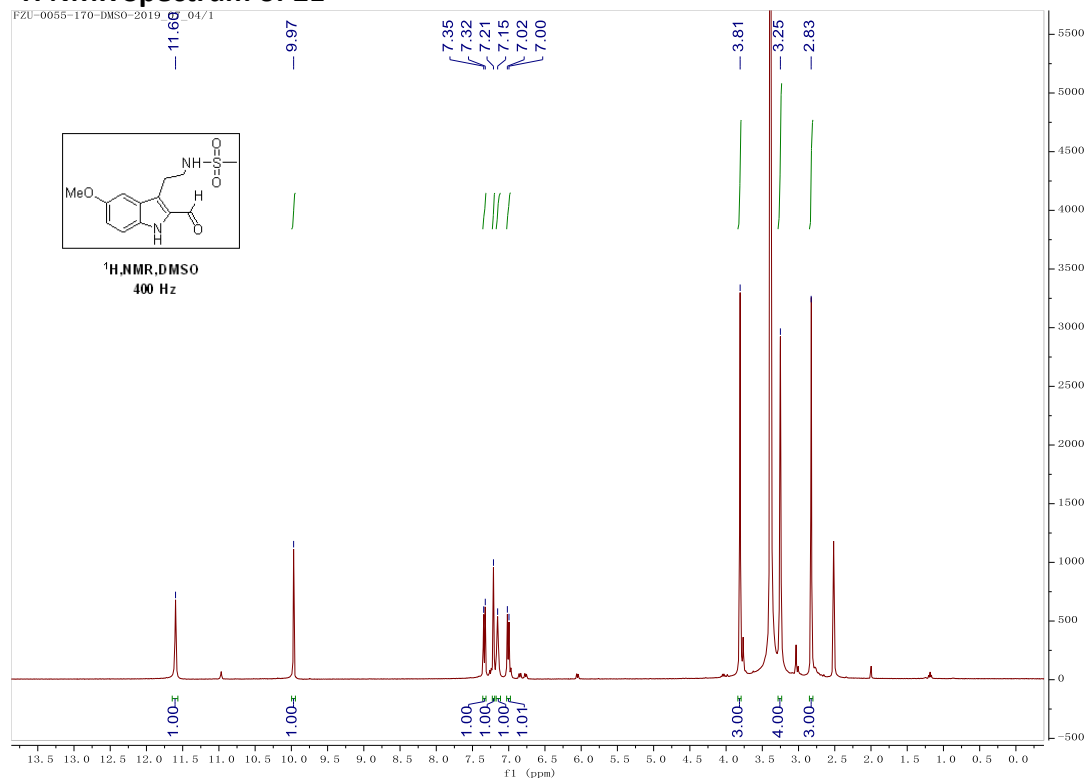

# <sup>13</sup>C NMR Spectrum of 21

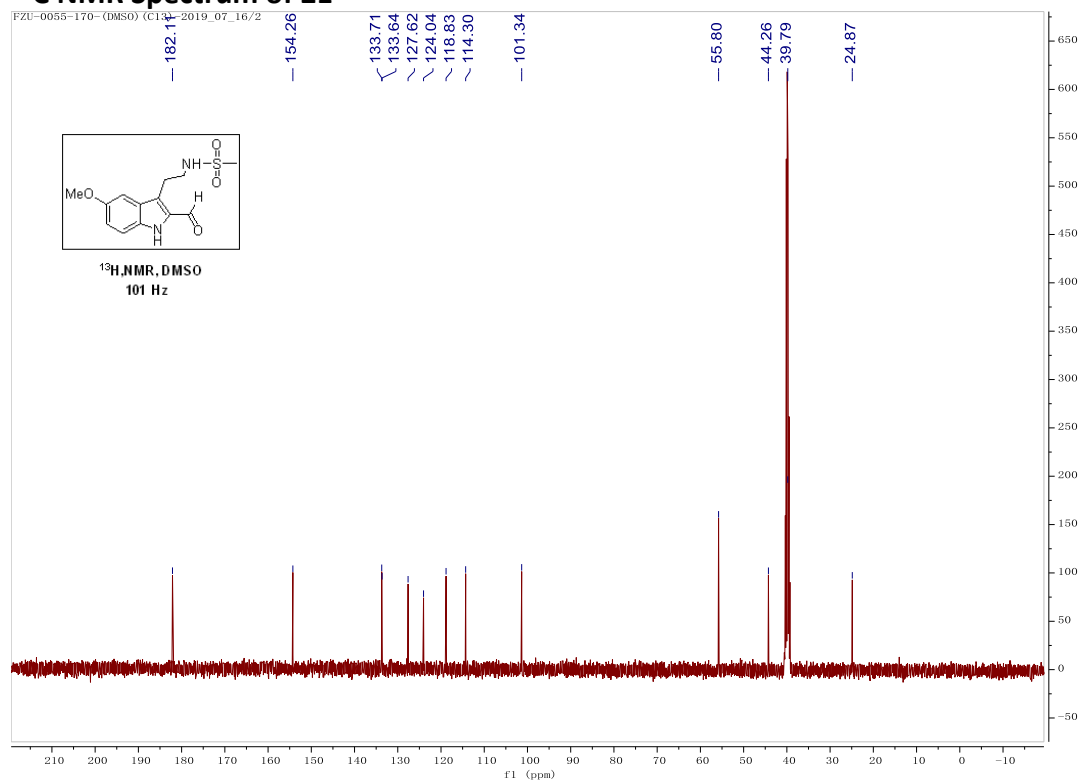

# **<sup>1</sup>H NMR Spectrum of 22**

FZU-0055-176-P2-2019\_07\_11/1

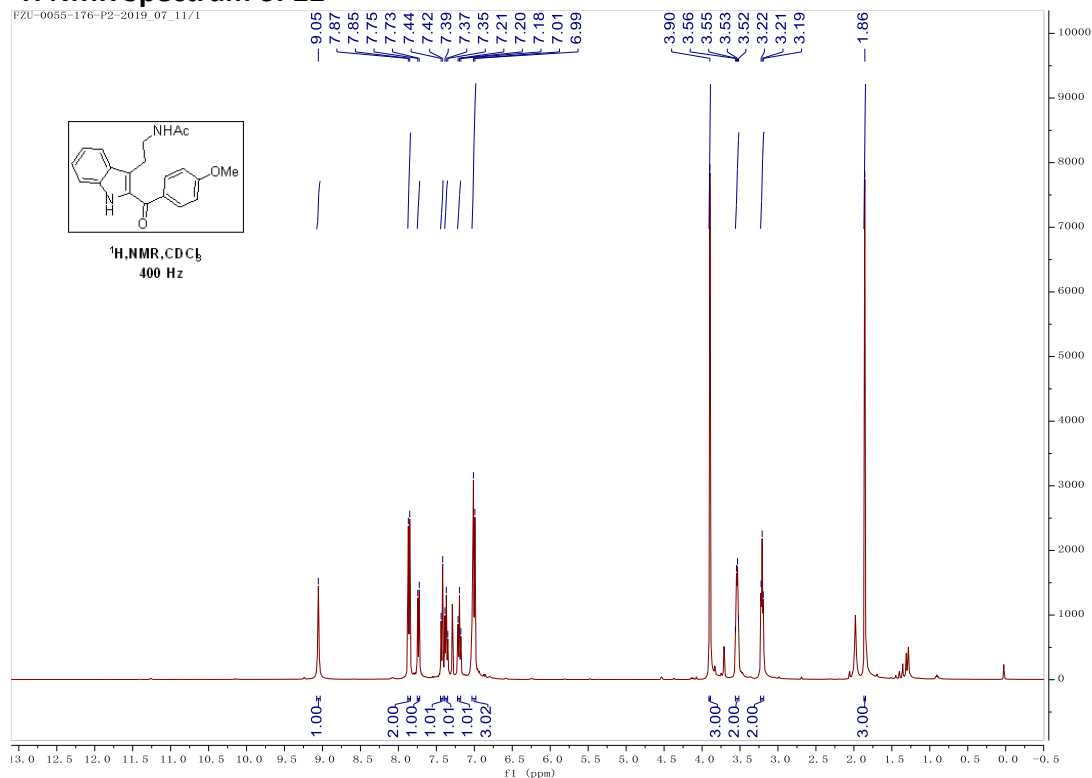

# **<sup>13</sup>C NMR Spectrum of 22**

FZU-0055-175-(C60)-2019\_07\_11

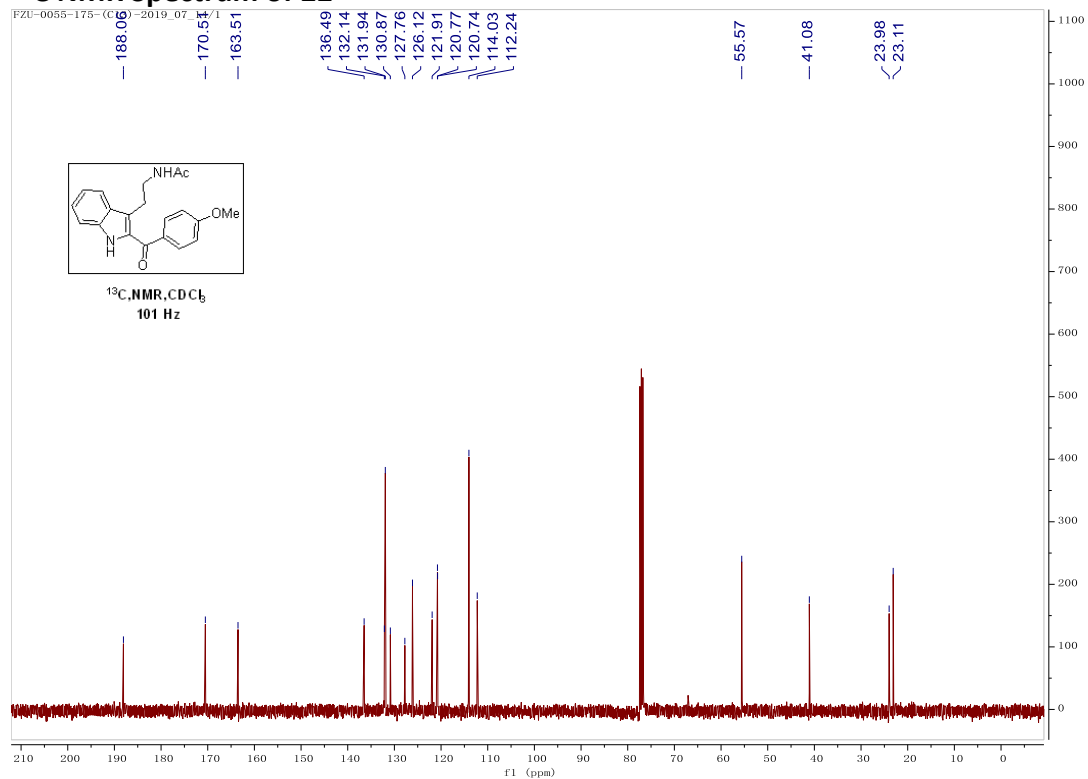



# <sup>1</sup>H NMR Spectrum of 24

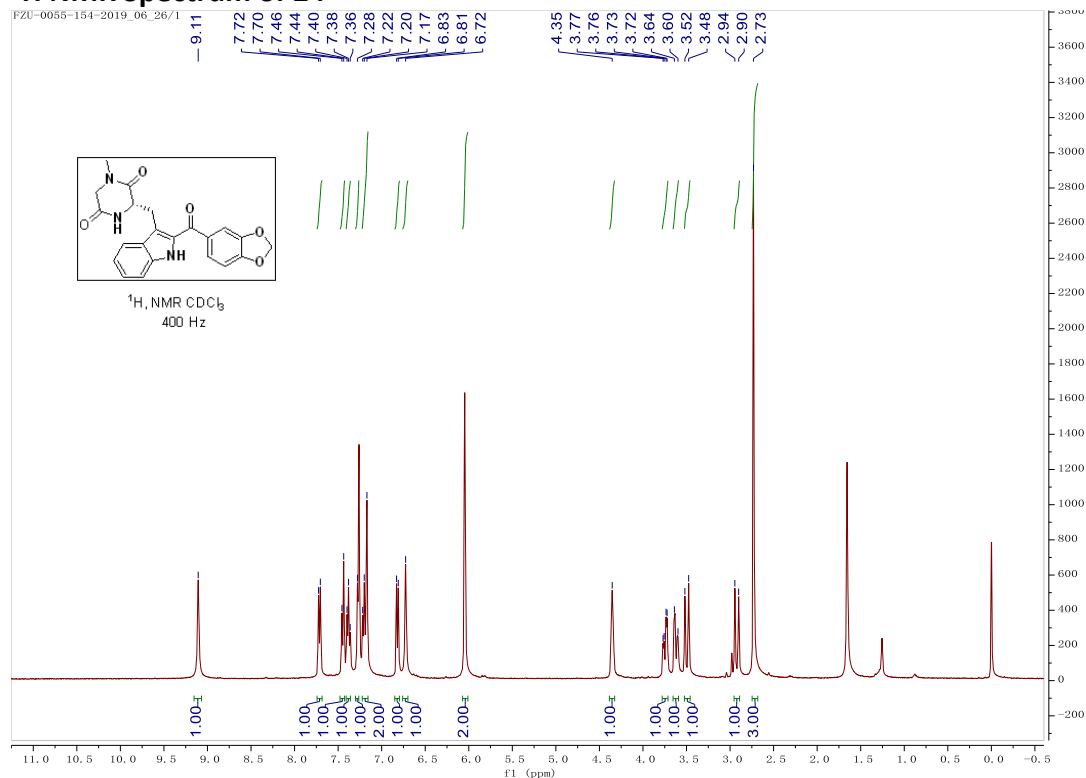

# <sup>13</sup>C NMR Spectrum of 24

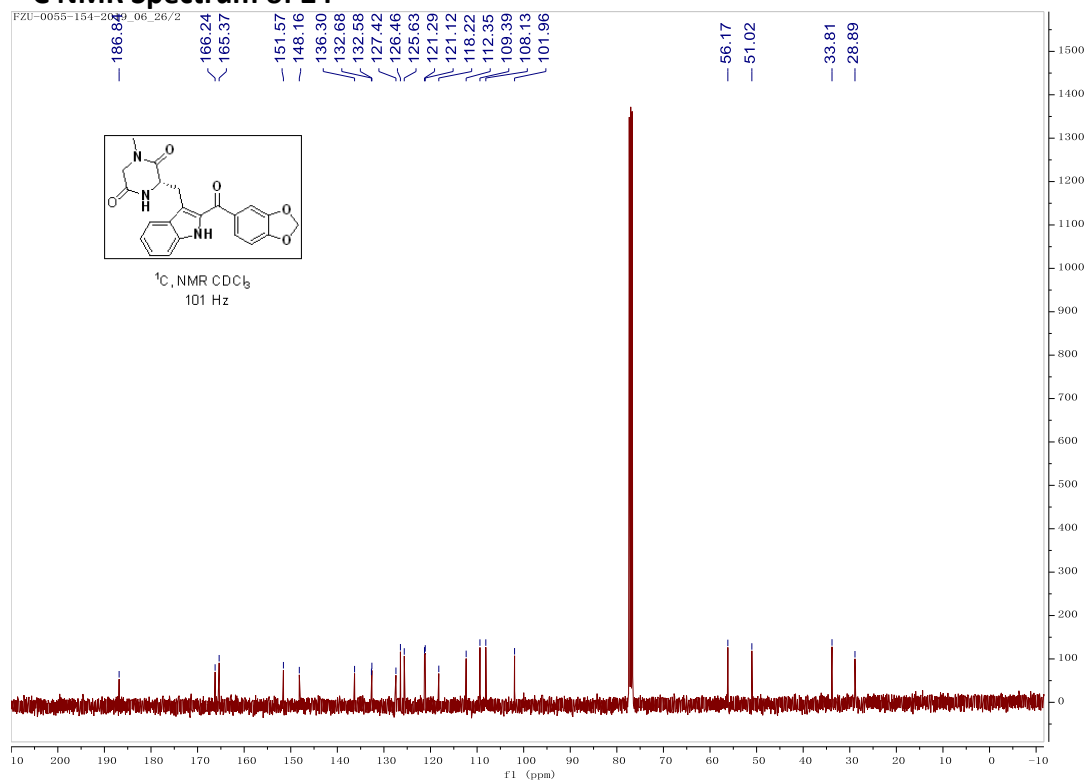

# <sup>1</sup>H NMR Spectrum of 25

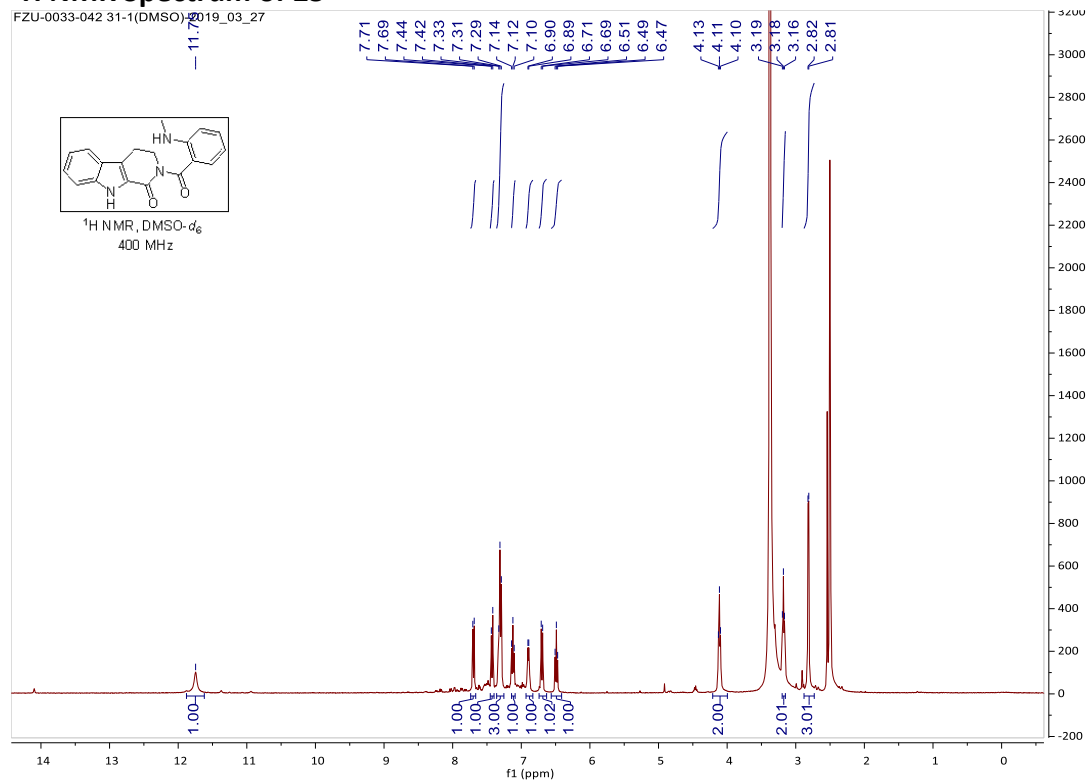

**Note:** Compound 25 is unstable.

# <sup>13</sup>C NMR Spectrum of 25

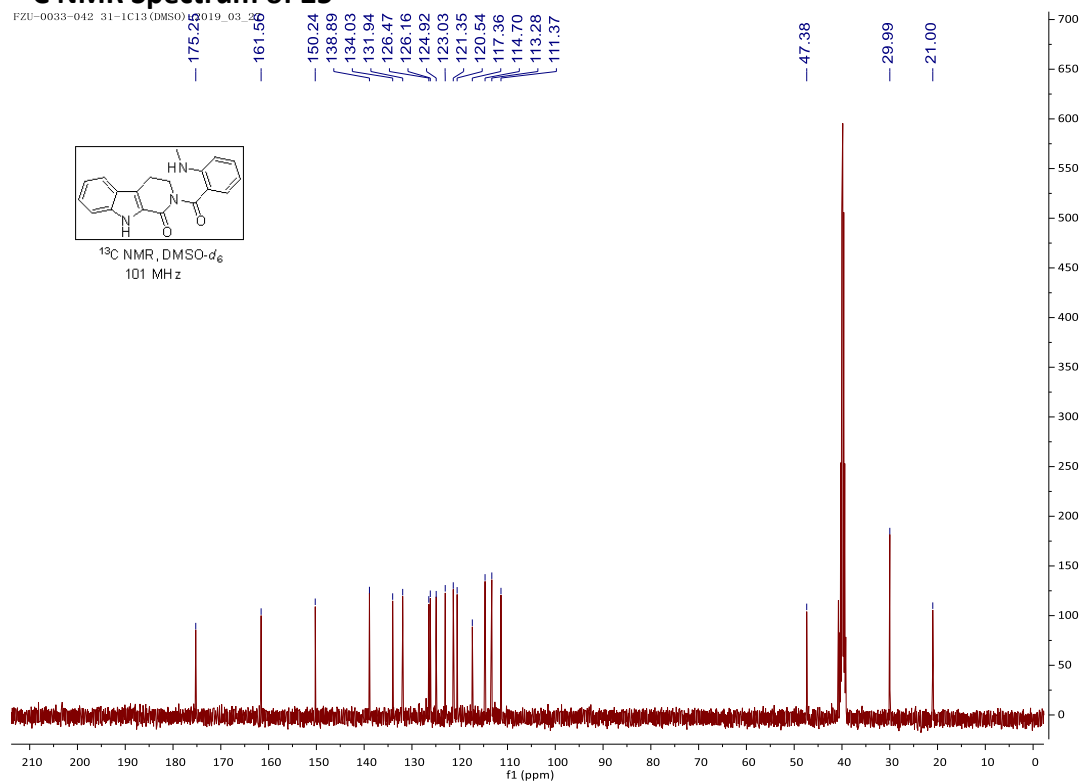

FZU-0055-110-2019 05 15/1

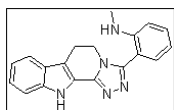

FZU-0055-110-(C13)-2019 05 16

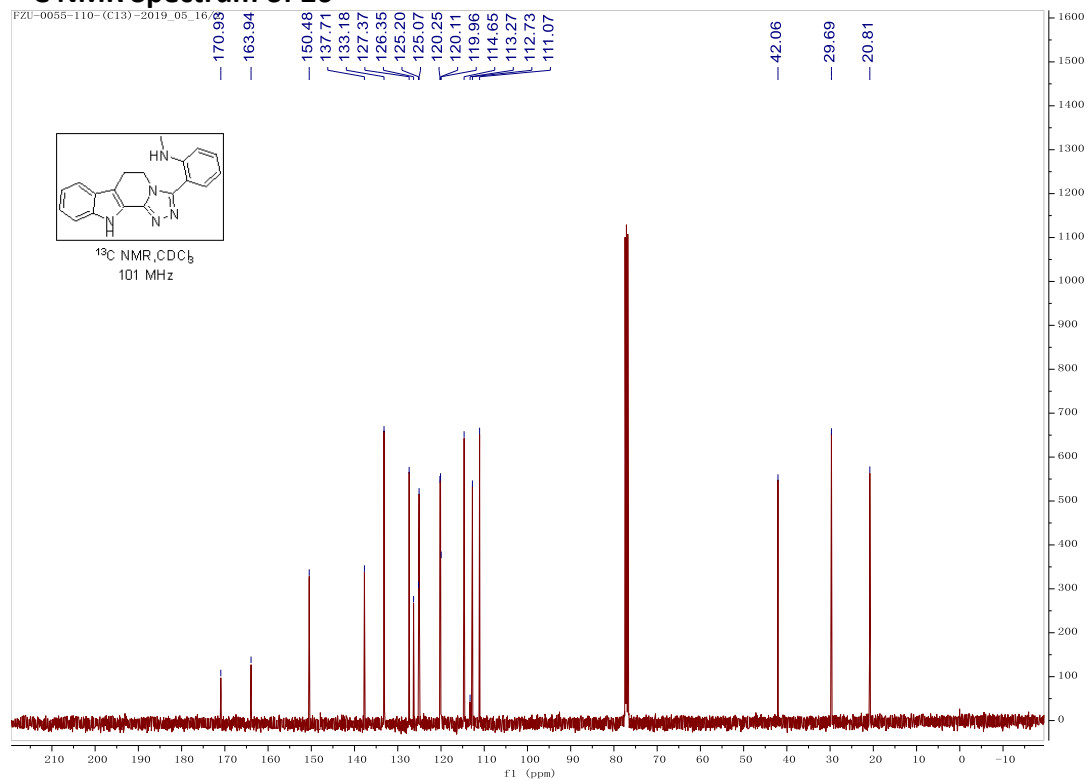

## References

1. Jyoti Chauhan, T. L., Subhabrata Sen., Iodine-Catalyzed Metal-Free Oxidative Ring Opening of 1-Aryltetrahydro- $\beta$ -carbolines: Facile Synthesis of C-2 Aryl and Aryl Methanimino Indole Derivatives. *Eur. J. Org. Chem.* **2018**, 34, 4776-4786.
2. LiZeng, J., Design, synthesis, and evaluation of a novel class of 2,3-disubstituted-tetrahydro- $\beta$ -carboline derivatives. *Bioorg. Med. Chem. Lett.* **2012**, 22, 3718-3722.
3. Wang, L. C. J. X. H. S. Y. L. Y. G. L. W. Q., Design, Synthesis, and Biological Activities of Spirooxindoles Containing Acylhydrazone Fragment Derivatives Based on the Biosynthesis of Alkaloids Derived from Tryptophan. *J. Agric. Food. Chem.* **2016**, 64, 6508-6516.
4. Ye, J.; Lin, Y.; Liu, Q.; Xu, D.; Wu, F.; Liu, B.; Gao, Y.; Chen, H., Biomimetic Oxidative Coupling Cyclization Enabling Rapid Construction of Isochromanoindolenines. *Org. Lett.* **2018**, 20, 5457-5460.
5. Ye, J.; Wu, J.; Lv, T.; Wu, G.; Gao, Y.; Chen, H., Oxidative Rearrangement Coupling Reaction for the Functionalization of Tetrahydro-beta-carbolines with Aromatic Amines. *Angew. Chem. Int. Ed.* **2017**, 56, 14968-14972.
6. Youn, S. W., Development of the Pictet–Spengler Reaction Catalyzed by AuCl<sub>3</sub>/AgOTf. *J. Org. Chem.* **2006**, 71, 2521-2523.
